# Supplementary material for: Rh(iii)-catalyzed C–H/C–C bond annulation of enaminones with iodonium ylides to form isocoumarins
Source: Royal Society of Chemistry journal article supplement (doi:10.1039/d2cc05899e), 2022-01-01

## Supporting information

Rh(III)-catalyzed C-H/C-C bond annulation of enaminones with iodonium ylides to form isocoumarins

Zi Yang,<sup>1</sup> Chaoshui Liu,<sup>2</sup> Jieni Lei,<sup>1</sup> Yi Zhou,<sup>1</sup> Xiaohui Gao,<sup>\*1</sup> Yaqian Li<sup>\*1</sup>

1. Academician Workstation, Changsha Medical University, Changsha 410219, P. R. China
  2. Hunan Key Laboratory of the Research and Development of Novel Pharmaceutical Preparations, Changsha Medical University, Changsha 410219, P. R. China
- Email: yaqianli01@163.com

### Table of Contents

|                                                                                        |     |
|----------------------------------------------------------------------------------------|-----|
| 1. General information.....                                                            | S2  |
| 2. Typical procedure for synthesis of <b>3</b> .....                                   | S2  |
| 3. Mechanism experiments.....                                                          | S2  |
| 4. Characterization of compounds <b>3</b> .....                                        | S7  |
| 5. References.....                                                                     | S16 |
| 6. Copies of <sup>1</sup> H, <sup>13</sup> C, and <sup>19</sup> F NMR of products..... | S17 |

## 1. General Information

All chemicals were analytically pure and used directly after purchased. All solvents were used without any particular precautions to extrude moisture.  $^1\text{H}$  NMR spectra were recorded on 400 MHz spectrometer, and  $^{13}\text{C}$  NMR spectra were recorded on a 100 MHz spectrometer. All spectra were referenced to the solvent peaks ( $^1\text{H}$ : residual  $\text{CDCl}_3 = 7.26$  ppm,  $^{13}\text{C}$ :  $\text{CDCl}_3 = 77.00$  ppm). High-resolution mass spectra (HRMS) were equipped with an ESI source and a TOF detector. Column chromatography was performed on silica gel (70-230 mesh ASTM) using the reported eluents. Thin-layer chromatography (TLC) was carried out on  $4 \times 15$  cm plates with a layer thickness of 0.2 mm (silica gel 60 F254). enaminones<sup>[1]</sup> and aryl iodonium ylide<sup>[2]</sup> were synthesized according to the previously reported procedure.

## 2. Typical procedure for synthesis of 3

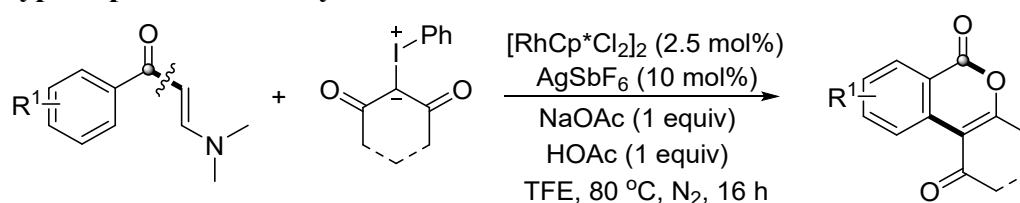

To a tube equipped with magnetic stir bar, enaminone (**1**, 0.20 mmol), iodonium ylides (**2**, 0.30 mmol),  $[\text{RhCp}^*\text{Cl}_2]_2$  (2.5 mol %),  $\text{AgSbF}_6$  (10 mol%), NaOAc (1 equiv.) and HOAc (1 equiv.) in TFE (2.0 mL) were added and stirred at 80 °C for 16 h under  $\text{N}_2$  atmosphere. After removal of the solvent under reduced pressure, purification was performed by flash column chromatography on silica gel with petroleum ether/ethyl acetate (gradient mixture ratio from 10:1 to 1:1) as eluent to afford the corresponding products.

## 3. Mechanism Experiments

### (1) H/D exchange

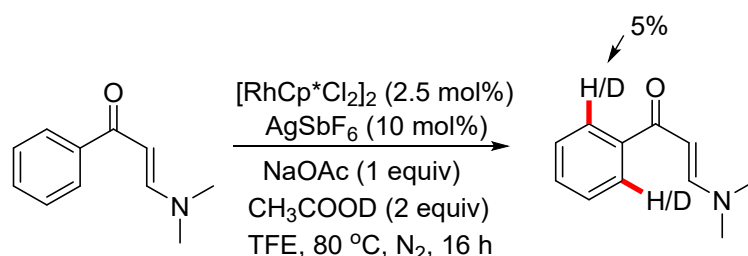

To a tube equipped with magnetic stir bar, enaminone (**1a**, 0.20 mmol),  $[\text{RhCp}^*\text{Cl}_2]_2$  (2.5 mol %),  $\text{AgSbF}_6$  (10 mol%), NaOAc (1 equiv.) and  $\text{CH}_3\text{COOD}$  (0.40 mmol, 2 equiv.) in TFE (2.0 mL) were added and stirred at 80 °C for 16 h under  $\text{N}_2$  atmosphere. After removal of the solvent under reduced pressure, purification was performed by flash column chromatography on silica gel with petroleum ether/ethyl acetate (gradient

mixture ratio from 10:1 to 1:1) as eluent to afford the corresponding products.

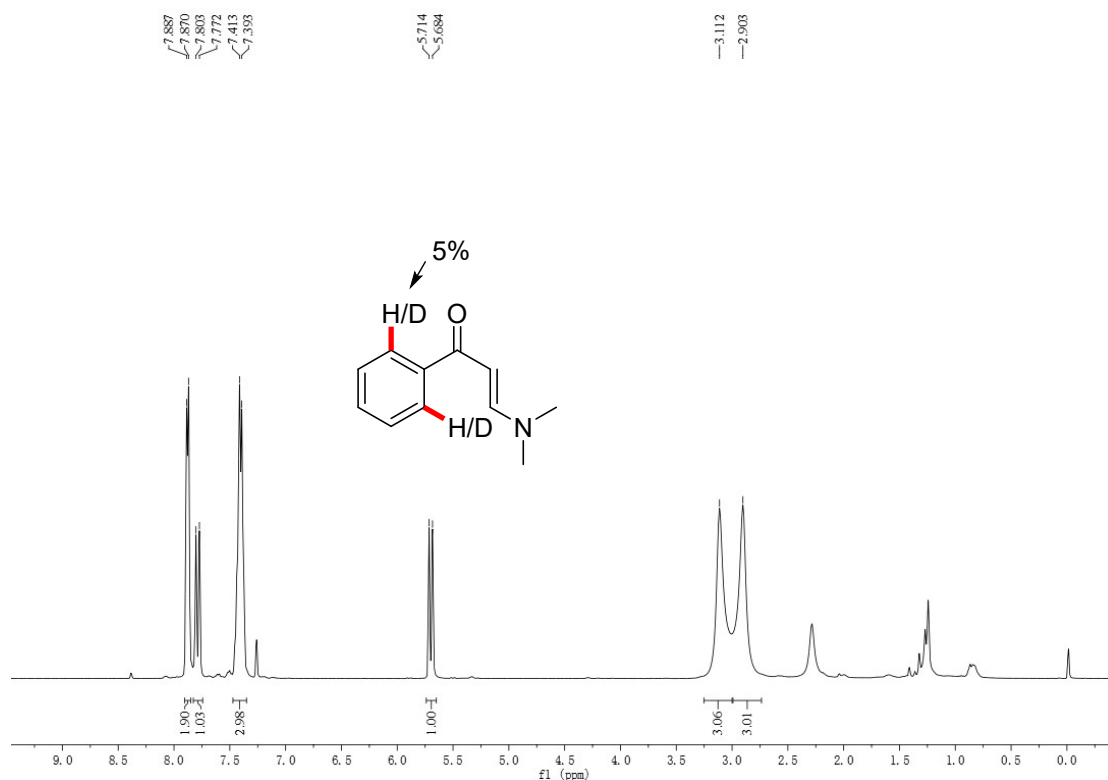

## (2) General procedure for estimation of the KIE:

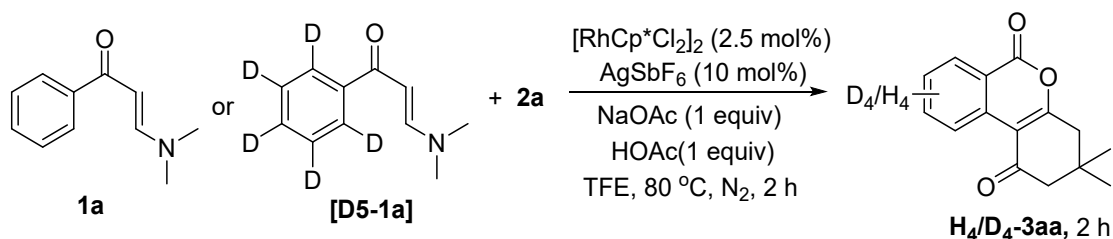

To two separated tube charged with enaminones (**1a**, 0.20 mmol) or **D<sub>5</sub>-1a** (0.20 mmol), iodonium ylide (**2a**, 0.3 mmol), [RhCp\*Cl<sub>2</sub>]<sub>2</sub> (2.5 mol %), AgSbF<sub>6</sub> (10 mol%), NaOAc (1 equiv.) and HOAc (1 equiv.) in TFE(2.0 mL) were added and stirred at 80 °C for 2 h under N<sub>2</sub> atmosphere. After removal of the solvent under reduced pressure, purification was performed by flash column chromatography on silica gel with petroleum ether/ethyl acetate (gradient mixture ratio from 20:1 to 4:1) as eluent to afford the corresponding products.

## (3) Intermolecular competition reaction with differently substituted enaminones

A suspension of enaminone **1e** (41.0 mg, 0.2 mmol) and **1k** (48.6 mg, 0.2 mmol), (4,4-dimethyl-2,6-dimethylenecyclohexylidene)(phenyl)-λ<sup>3</sup>-iodane **2a** (68.4 mg, 0.2

mmol),  $[\text{RhCp}^*\text{Cl}_2]_2$  (2.5 mol %),  $\text{AgSbF}_6$  (10 mol%),  $\text{NaOAc}$  (1 equiv.) and  $\text{HOAc}$  (1 equiv.) in  $\text{TFE}$  (2.0 mL) were added and stirred at 80 °C for 16 h under  $\text{N}_2$  atmosphere. After removal of the solvent under reduced pressure, purification was performed by flash column chromatography on silica gel with petroleum ether/ethyl acetate (gradient mixture ratio from 20:1 to 4:1) as eluent to afford the corresponding products **3ea** and **3ka** at a ratio of 1:0.25.

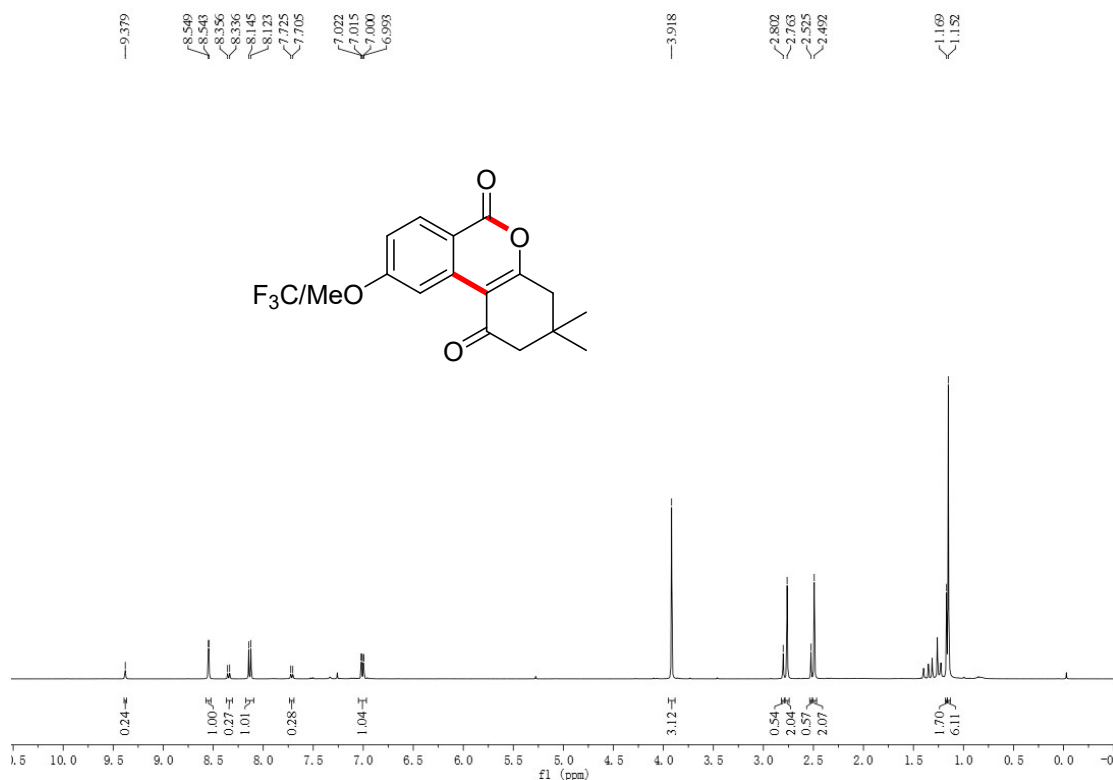

#### (4) Control experiments

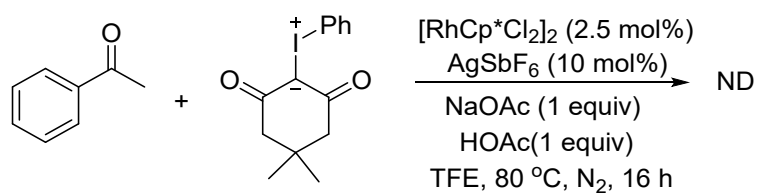

To a tube equipped with magnetic stir bar, acetophenone (0.20 mmol), iodonium ylides (**2a**, 0.30 mmol),  $[\text{RhCp}^*\text{Cl}_2]_2$  (2.5 mol %),  $\text{AgSbF}_6$  (10 mol%),  $\text{NaOAc}$  (1 equiv.) and  $\text{HOAc}$  (1 equiv.) in  $\text{TFE}$  (2.0 mL) were added and stirred at 80 °C for 16 h under  $\text{N}_2$  atmosphere.

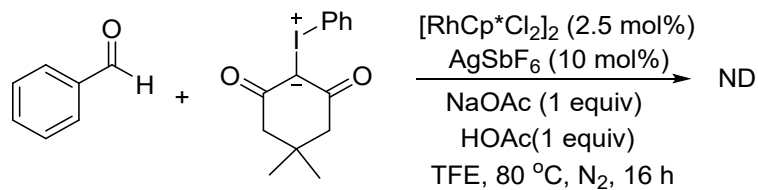

To a tube equipped with magnetic stir bar, benzaldehyde (0.20 mmol), iodonium ylides (**2a**, 0.30 mmol),  $[\text{RhCp}^*\text{Cl}_2]_2$  (2.5 mol %),  $\text{AgSbF}_6$  (10 mol%), NaOAc (1 equiv.) and HOAc (1 equiv.) in TFE (2.0 mL) were added and stirred at 80 °C for 16 h under  $\text{N}_2$  atmosphere.

### (5) Intermediate detection

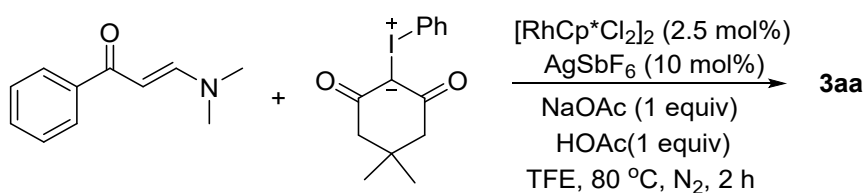

To a tube equipped with magnetic stir bar, enaminone (**1a**, 0.20 mmol), iodonium ylides (**2a**, 0.30 mmol),  $[\text{RhCp}^*\text{Cl}_2]_2$  (2.5 mol %),  $\text{AgSbF}_6$  (10 mol%), NaOAc (1 equiv.) and HOAc (1 equiv.) in TFE (2.0 mL) were added and stirred at 80 °C for 2 h under  $\text{N}_2$  atmosphere. Then we detected the reaction mixture by HRMS.

|             |             |                        |                                   |                 |             |
|-------------|-------------|------------------------|-----------------------------------|-----------------|-------------|
| Sample Name | Unavailable | Position               | Unavailable                       | Instrument Name | Unavailable |
| User Name   | Unavailable | Inj Vol                | Unavailable                       | InjPosition     | Unavailable |
| Sample Type | Unavailable | IRM Calibration Status | Success                           | Data Filename   | YZ-2H.d     |
| ACQ Method  |             | Comment                | Sample information is unavailable | Acquired Time   | Unavailable |

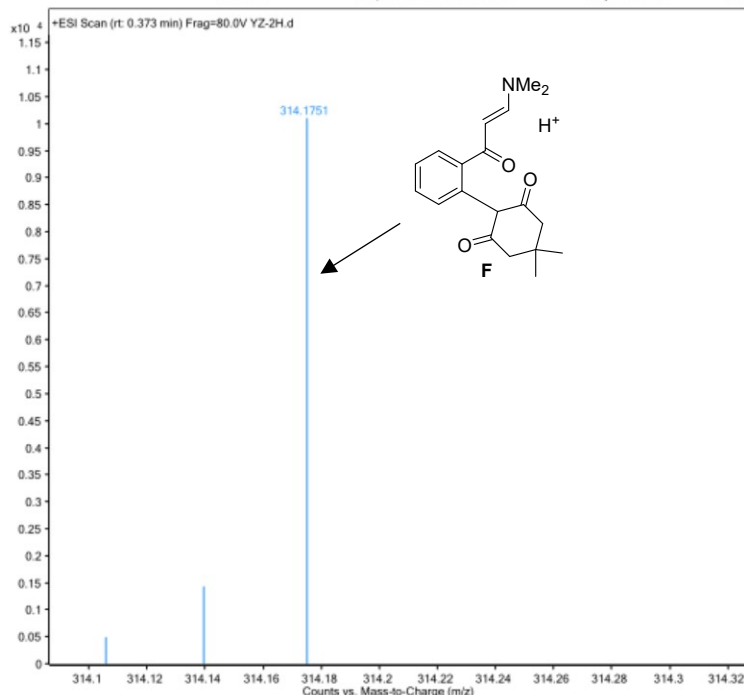

Sample Name  
User Name  
Sample Type  
ACQ Method

Sample34  
shui20jachun80 3min.m

Position P1-D7  
Inj Vol 5  
IRM Calibration Status Success  
Comment

Instrument Name Instrument 1  
InjPosition  
Data Filename YZ-2H.d  
Acquired Time 10/27/2022 6:14:17 PM

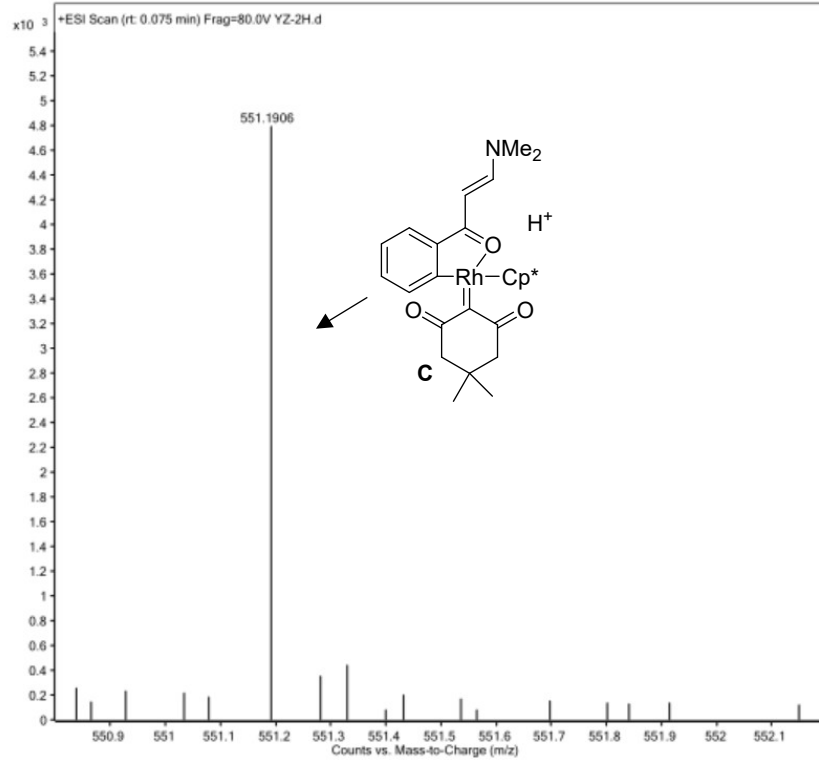

Sample Name  
User Name  
Sample Type  
ACQ Method

Sample34  
shui20jachun80 3min.m

Position P1-D7  
Inj Vol 5  
IRM Calibration Status Success  
Comment

Instrument Name Instrument 1  
InjPosition  
Data Filename YZ-2H.d  
Acquired Time 10/27/2022 6:14:17 PM

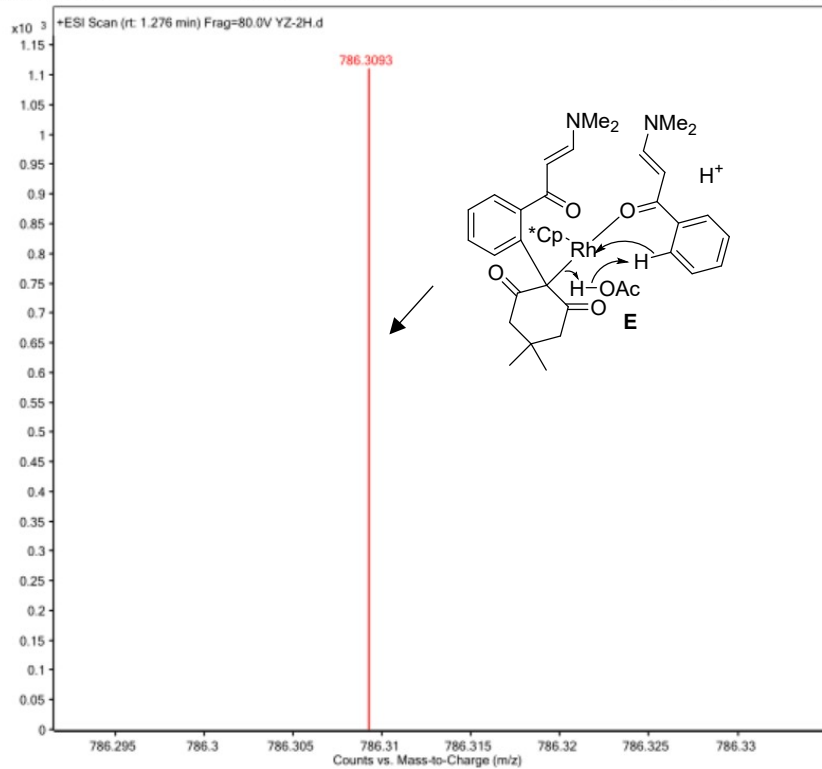

#### 4. Characterization of compounds 3

##### 3,3-Dimethyl-3,4-dihydro-1*H*-benzo[*c*]chromene-1,6(2*H*)-dione (3aa)<sup>[3]</sup>

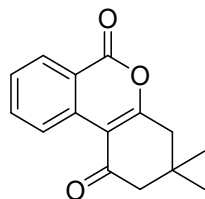

silica gel column chromatography (petroleum ether/ethyl acetate = 4:1), 38.7 mg, 80% yield, pale yellow solid. <sup>1</sup>H NMR (400 MHz, CDCl<sub>3</sub>) δ 9.03 (d, *J* = 8.3 Hz, 1H), 8.27 (d, *J* = 7.9 Hz, 1H), 7.78 (t, *J* = 8.2 Hz, 1H), 7.52 (t, *J* = 7.6 Hz, 1H), 2.79 (s, 2H), 2.51 (s, 2H), 1.17 (s, 6H). <sup>13</sup>C NMR (100 MHz, CDCl<sub>3</sub>) δ 196.89, 167.91, 160.67, 135.59, 133.80, 129.53, 128.35, 125.77, 119.71, 110.52, 52.80, 42.49, 31.91, 28.10.

##### 3,3,9-Trimethyl-3,4-dihydro-1*H*-benzo[*c*]chromene-1,6(2*H*)-dione (3ba)

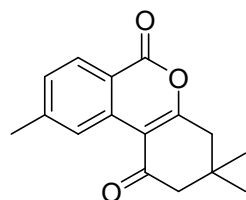

silica gel column chromatography (petroleum ether/ethyl acetate = 4:1), 48.1 mg, 94% yield, pale yellow solid. m.p. 142-144 °C. <sup>1</sup>H NMR (400 MHz, CDCl<sub>3</sub>) δ 8.81 (s, 1H), 8.12 (d, *J* = 8.1 Hz, 1H), 7.30 (d, *J* = 8.1 Hz, 1H), 2.76 (s, 2H), 2.49 (s, 2H), 2.48 (s, 3H), 1.15 (s, 6H). <sup>13</sup>C NMR (100 MHz, CDCl<sub>3</sub>) δ 196.98, 168.02, 160.63, 146.88, 133.72, 129.52, 129.46, 125.73, 117.15, 110.40, 52.82, 42.48, 31.84, 28.04, 22.41. HRMS (ESI): Calcd for C<sub>16</sub>H<sub>16</sub>O<sub>3</sub> [M+H]<sup>+</sup>: 257.1172; found: 257.1171

##### 9-Ethyl-3,3-dimethyl-3,4-dihydro-1*H*-benzo[*c*]chromene-1,6(2*H*)-dione (3ca)

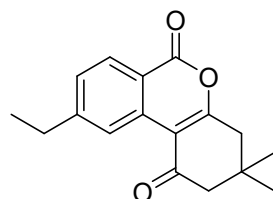

silica gel column chromatography (petroleum ether/ethyl acetate = 4:1), 51.3 mg, 95% yield, yellow solid. m.p. 100-102 °C. <sup>1</sup>H NMR (400 MHz, CDCl<sub>3</sub>) δ 8.86 (s, 1H), 8.16 (d, *J* = 8.1 Hz, 1H), 7.34 (d, *J* = 9.4 Hz, 1H), 2.81 – 2.73 (m, 4H), 2.49 (s, 2H), 1.27 (t, *J* = 7.6 Hz, 3H), 1.15 (s, 6H). <sup>13</sup>C NMR (100 MHz, CDCl<sub>3</sub>) δ 197.02, 167.99, 160.64, 152.98, 133.88, 129.61, 128.40, 124.72, 117.36, 110.49, 52.84, 42.48, 31.85, 29.61, 28.05, 15.13. HRMS (ESI): Calcd for C<sub>17</sub>H<sub>18</sub>O<sub>3</sub> [M+H]<sup>+</sup>: 271.1329; found: 271.1329

##### 9-(Tert-butyl)-3,3-dimethyl-3,4-dihydro-1*H*-benzo[*c*]chromene-1,6(2*H*)-dione

**(3da)**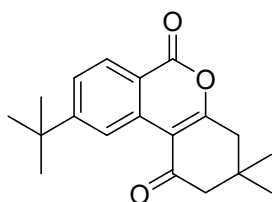

silica gel column chromatography (petroleum ether/ethyl acetate = 4:1), 49.5 mg, 83% yield, white solid. m.p. 160-162 °C.  $^1\text{H NMR}$  (400 MHz,  $\text{CDCl}_3$ )  $\delta$  9.11 (s, 1H), 8.18 (d,  $J = 8.4$  Hz, 1H), 7.56 (d,  $J = 8.4$  Hz, 1H), 2.77 (s, 2H), 2.50 (s, 2H), 1.37 (s, 9H), 1.16 (s, 6H).  $^{13}\text{C NMR}$  (100 MHz,  $\text{CDCl}_3$ )  $\delta$  197.13, 167.98, 160.60, 159.72, 133.74, 129.30, 126.01, 122.34, 117.13, 110.67, 52.92, 42.52, 35.72, 31.89, 30.97, 28.07. **HRMS (ESI)**: Calcd for  $\text{C}_{19}\text{H}_{22}\text{O}_3$   $[\text{M}+\text{H}]^+$ : 299.1642; found: 299.1639

**9-Methoxy-3,3-dimethyl-3,4-dihydro-1H-benzo[c]chromene-1,6(2H)-dione (3ea)**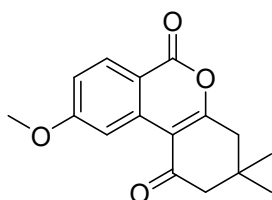

silica gel column chromatography (petroleum ether/ethyl acetate = 2:1), 52.2 mg, 96% yield, pale yellow solid. m.p. 124-126 °C.  $^1\text{H NMR}$  (400 MHz,  $\text{CDCl}_3$ )  $\delta$  8.54 (d,  $J = 2.3$  Hz, 1H), 8.13 (d,  $J = 8.9$  Hz, 1H), 7.01 (dd,  $J = 8.9, 2.4$  Hz, 1H), 3.92 (s, 3H), 2.76 (s, 2H), 2.49 (s, 2H), 1.15 (s, 6H).  $^{13}\text{C NMR}$  (100 MHz,  $\text{CDCl}_3$ )  $\delta$  197.12, 168.87, 165.34, 160.27, 136.16, 131.53, 116.92, 112.47, 110.20, 107.87, 55.64, 52.79, 42.53, 31.82, 28.04. **HRMS (ESI)**: Calcd for  $\text{C}_{16}\text{H}_{16}\text{O}_4$   $[\text{M}+\text{H}]^+$ : 273.1121; found: 273.1120

**9-Fluoro-3,3-dimethyl-3,4-dihydro-1H-benzo[c]chromene-1,6(2H)-dione (3fa)**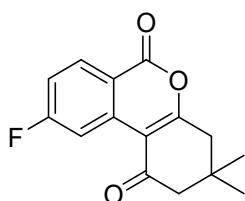

silica gel column chromatography (petroleum ether/ethyl acetate = 4:1), 45.8 mg, 88% yield, yellow solid. m.p. 119-121 °C.  $^1\text{H NMR}$  (400 MHz,  $\text{CDCl}_3$ )  $\delta$  8.75 (dd,  $J = 11.3, 2.4$  Hz, 1H), 8.26 (dd,  $J = 8.8, 5.9$  Hz, 1H), 7.19 (td,  $J = 8.6, 2.5$  Hz, 1H), 2.78 (s, 2H), 2.51 (s, 2H), 1.16 (s, 6H).  $^{13}\text{C NMR}$  (100 MHz,  $\text{CDCl}_3$ )  $\delta$  196.49, 169.13, 167.18 (d,  $J_{\text{C-F}} = 256.1$  Hz), 159.66, 136.47 (d,  $J_{\text{C-F}} = 12.3$  Hz), 132.62 (d,  $J_{\text{C-F}} = 10.6$  Hz), 116.56 (d,  $J_{\text{C-F}} = 23.6$  Hz), 116.14 (d,  $J_{\text{C-F}} = 2.3$  Hz), 112.34 (d,  $J_{\text{C-F}} = 26.2$  Hz), 109.89 (d,  $J_{\text{C-F}}$



= 3.1 Hz), 52.54, 42.45, 31.86, 28.06. <sup>19</sup>F NMR (376 MHz, CDCl<sub>3</sub>) δ -98.88. HRMS (ESI): Calcd for C<sub>15</sub>H<sub>13</sub>FO<sub>3</sub> [M+H]<sup>+</sup>: 261.0921; found: 261.0921

**9-Chloro-3,3-dimethyl-3,4-dihydro-1H-benzo[c]chromene-1,6(2H)-dione (3ga)**

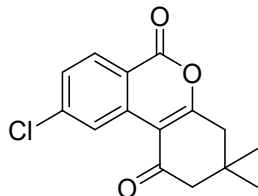

silica gel column chromatography (petroleum ether/ethyl acetate = 4:1), 40.3 mg, 73% yield, white solid. m.p. 157-159 °C. <sup>1</sup>H NMR (400 MHz, CDCl<sub>3</sub>) δ 9.07 (d, *J* = 1.8 Hz, 1H), 8.16 (d, *J* = 8.5 Hz, 1H), 7.45 (dd, *J* = 8.5, 1.9 Hz, 1H), 2.78 (s, 2H), 2.51 (s, 2H), 1.16 (s, 6H). <sup>13</sup>C NMR (100 MHz, CDCl<sub>3</sub>) δ 196.43, 169.06, 159.83, 142.65, 134.99, 130.95, 128.86, 125.65, 117.96, 109.65, 52.58, 42.49, 31.86, 28.06. HRMS (ESI): Calcd for C<sub>15</sub>H<sub>13</sub>ClO<sub>3</sub> [M+H]<sup>+</sup>: 277.0626; found: 277.0624

**9-Bromo-3,3-dimethyl-3,4-dihydro-1H-benzo[c]chromene-1,6(2H)-dione (3ha)**

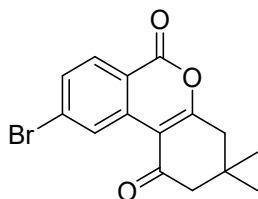

silica gel column chromatography (petroleum ether/ethyl acetate = 4:1), 49.3 mg, 77% yield, white solid. m.p. 167-169 °C. <sup>1</sup>H NMR (400 MHz, CDCl<sub>3</sub>) δ 9.23 (d, *J* = 1.6 Hz, 1H), 8.06 (d, *J* = 8.5 Hz, 1H), 7.61 (dd, *J* = 8.5, 1.8 Hz, 1H), 2.78 (s, 2H), 2.50 (s, 2H), 1.16 (s, 6H). <sup>13</sup>C NMR (100 MHz, CDCl<sub>3</sub>) δ 196.40, 169.02, 159.97, 134.98, 131.75, 131.61, 130.87, 128.66, 118.32, 109.51, 52.57, 42.49, 31.85, 28.05. HRMS (ESI): Calcd for C<sub>15</sub>H<sub>13</sub>BrO<sub>3</sub> [M+H]<sup>+</sup>: 321.0121; found: 321.0210

**9-Iodo-3,3-dimethyl-3,4-dihydro-1H-benzo[c]chromene-1,6(2H)-dione (3ia)**

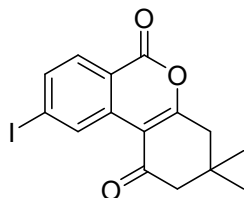

silica gel column chromatography (petroleum ether/ethyl acetate = 4:1), 55.2 mg, 75% yield, white solid. m.p. 178-180 °C. <sup>1</sup>H NMR (400 MHz, CDCl<sub>3</sub>) δ 9.42 (s, 1H), 7.86 (d, *J* = 8.4 Hz, 1H), 7.81 (dd, *J* = 8.4, 1.0 Hz, 1H), 2.77 (s, 2H), 2.49 (s, 2H), 1.15 (s, 6H). <sup>13</sup>C NMR (100 MHz, CDCl<sub>3</sub>) δ 196.35, 168.83, 160.16, 137.54, 134.68, 134.58,

130.43, 118.72, 109.23, 104.87, 52.55, 42.46, 31.81, 28.03. **HRMS (ESI):** Calcd for  $C_{15}H_{13}IO_3$   $[M+H]^+$ : 368.9982; found: 368.9981

**3,3-Dimethyl-9-nitro-3,4-dihydro-1H-benzo[c]chromene-1,6(2H)-dione (3ja)**

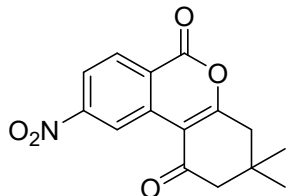

silica gel column chromatography (petroleum ether/ethyl acetate = 2:1), 28.1 mg, 49% yield, yellow solid. m.p. 167-169 °C.  $^1H$  NMR (400 MHz,  $CDCl_3$ )  $\delta$  9.92 (d,  $J$  = 1.8 Hz, 1H), 8.43 (d,  $J$  = 8.7 Hz, 1H), 8.28 (dd,  $J$  = 8.7, 2.0 Hz, 1H), 2.84 (s, 2H), 2.56 (s, 2H), 1.20 (s, 6H).  $^{13}C$  NMR (100 MHz,  $CDCl_3$ )  $\delta$  196.06, 169.67, 158.95, 152.10, 135.11, 131.21, 123.76, 122.39, 121.38, 109.64, 52.40, 42.45, 31.96, 28.08. Calcd for  $C_{15}H_{13}NO_5$   $[M+Na]^+$ : 310.0686; found: 310.0682

**3,3-Dimethyl-9-(trifluoromethyl)-3,4-dihydro-1H-benzo[c]chromene-1,6(2H)-dione (3ka)**

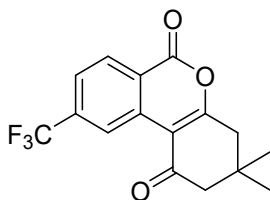

silica gel column chromatography (petroleum ether/ethyl acetate = 4:1), 52.1 mg, 84% yield, white solid. m.p. 175-177 °C.  $^1H$  NMR (400 MHz,  $CDCl_3$ )  $\delta$  9.39 (s, 1H), 8.36 (d,  $J$  = 8.3 Hz, 1H), 7.72 (d,  $J$  = 8.3 Hz, 1H), 2.81 (s, 2H), 2.53 (s, 2H), 1.18 (s, 6H).  $^{13}C$  NMR (100 MHz,  $CDCl_3$ )  $\delta$  196.44, 169.07, 159.50, 136.75 (q,  $J_{C-F}$  = 32.7 Hz), 134.30, 130.28, 124.66 (q,  $J_{C-F}$  = 3.4 Hz), 123.78 (q,  $J_{C-F}$  = 248.1 Hz), 123.26 (q,  $J_{C-F}$  = 4.1 Hz), 122.15, 109.83, 52.55, 42.45, 31.91, 28.04.  $^{19}F$  NMR (376 MHz,  $CDCl_3$ )  $\delta$  -63.39. **HRMS (ESI):** Calcd for  $C_{16}H_{13}F_3O_3$   $[M+Na]^+$ : 333.0709; found: 333.0707

**3,3-Dimethyl-1,6-dioxo-2,3,4,6-tetrahydro-1H-benzo[c]chromene-9-carbonitrile (3la)**

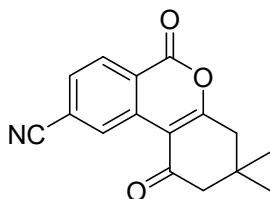

silica gel column chromatography (petroleum ether/ethyl acetate = 2:1), 27.2 mg, 51% yield, white solid. m.p. 144-146 °C. <sup>1</sup>H NMR (400 MHz, CDCl<sub>3</sub>) δ 9.45 (d, *J* = 0.9 Hz, 1H), 8.35 (d, *J* = 8.2 Hz, 1H), 7.74 (dd, *J* = 8.2, 1.4 Hz, 1H), 2.82 (s, 2H), 2.54 (s, 2H), 1.18 (s, 6H). <sup>13</sup>C NMR (100 MHz, CDCl<sub>3</sub>) δ 196.29, 169.49, 159.13, 134.29, 130.68, 130.26, 130.26, 122.44, 118.97, 117.59, 109.29, 52.45, 42.46, 31.93, 28.06. HRMS (ESI): Calcd for C<sub>16</sub>H<sub>13</sub>NO<sub>3</sub> [M+Na]<sup>+</sup>: 290.0788; found: 290.0785

**3,3-Dimethyl-9-(trifluoromethoxy)-3,4-dihydro-1*H*-benzo[*c*]chromene-1,6(2*H*)-dione (3ma)**

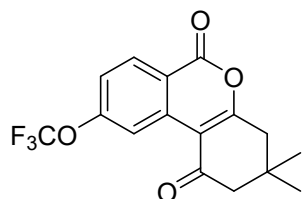

silica gel column chromatography (petroleum ether/ethyl acetate = 4:1), 43.7 mg, 67% yield, yellow solid. m.p. 99-101 °C. <sup>1</sup>H NMR (400 MHz, CDCl<sub>3</sub>) δ 8.97 (s, 1H), 8.30 (d, *J* = 8.8 Hz, 1H), 7.33 (d, *J* = 8.8 Hz, 1H), 2.80 (s, 2H), 2.52 (s, 2H), 1.17 (s, 6H). <sup>13</sup>C NMR (100 MHz, CDCl<sub>3</sub>) δ 196.46, 169.29, 159.51, 154.54, 135.96, 131.99, 120.23, 120.20 (q, *J*<sub>C-F</sub> = 259.8 Hz), 117.78, 116.90, 109.78, 52.55, 42.49, 31.90, 28.06. <sup>19</sup>F NMR (376 MHz, CDCl<sub>3</sub>) δ -57.41. HRMS (ESI): Calcd for C<sub>16</sub>H<sub>13</sub>F<sub>3</sub>O<sub>4</sub> [M+H]<sup>+</sup>: 327.0839; found: 327.0842

**3,3-Dimethyl-9-phenyl-3,4-dihydro-1*H*-benzo[*c*]chromene-1,6(2*H*)-dione (3na)**

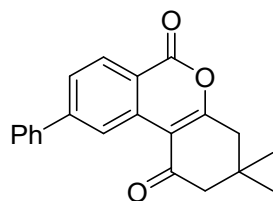

silica gel column chromatography (petroleum ether/ethyl acetate = 4:1), 55.4 mg, 87% yield, pale yellow solid. m.p. 158-160 °C. <sup>1</sup>H NMR (400 MHz, CDCl<sub>3</sub>) δ 9.33 (s, 1H), 8.31 (d, *J* = 8.3 Hz, 1H), 7.75 (dd, *J* = 8.3, 1.2 Hz, 1H), 7.71 (d, *J* = 7.3 Hz, 2H), 7.49 (t, *J* = 7.4 Hz, 2H), 7.42 (t, *J* = 7.2 Hz, 1H), 2.80 (s, 2H), 2.53 (s, 2H), 1.18 (s, 6H). <sup>13</sup>C NMR (100 MHz, CDCl<sub>3</sub>) δ 196.96, 168.31, 160.58, 148.18, 139.52, 134.26, 130.09, 128.97, 128.66, 127.54, 127.11, 124.07, 118.30, 110.54, 52.85, 42.54, 31.91, 28.10. HRMS (ESI): Calcd for C<sub>21</sub>H<sub>18</sub>O<sub>3</sub> [M+H]<sup>+</sup>: 319.1329; found: 319.1328

**3,3,7-Trimethyl-3,4-dihydro-1*H*-benzo[*c*]chromene-1,6(2*H*)-dione (3oa)**

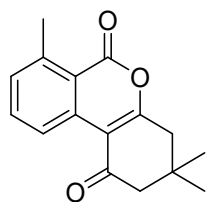

silica gel column chromatography (petroleum ether/ethyl acetate = 4:1), 19.5 mg, 38% yield, white solid. m.p. 127-129 °C.  $^1\text{H NMR}$  (400 MHz,  $\text{CDCl}_3$ )  $\delta$  8.94 (d,  $J = 8.3$  Hz, 1H), 7.62 (t,  $J = 7.9$  Hz, 1H), 7.31 (d,  $J = 7.4$  Hz, 1H), 2.79 (s, 3H), 2.76 (s, 2H), 2.50 (s, 2H), 1.16 (s, 6H).  $^{13}\text{C NMR}$  (100 MHz,  $\text{CDCl}_3$ )  $\delta$  196.82, 167.86, 159.71, 143.36, 135.29, 134.78, 131.40, 123.57, 118.15, 110.55, 53.07, 42.46, 31.81, 28.10, 23.73. **HRMS (ESI)**: Calcd for  $\text{C}_{16}\text{H}_{16}\text{O}_3$   $[\text{M}+\text{H}]^+$ : 257.1172; found: 257.1169

### 8-Chloro-3,3-dimethyl-3,4-dihydro-1H-benzo[c]chromene-1,6(2H)-dione (3pa)

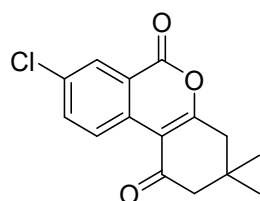

silica gel column chromatography (petroleum ether/ethyl acetate = 4:1), 11.6 mg, 21% yield, white solid. m.p. 170-172 °C.  $^1\text{H NMR}$  (400 MHz,  $\text{CDCl}_3$ )  $\delta$  9.03 (d,  $J = 8.9$  Hz, 1H), 8.24 (d,  $J = 2.4$  Hz, 1H), 7.72 (dd,  $J = 8.9, 2.4$  Hz, 1H), 2.80 (s, 2H), 2.52 (s, 2H), 1.18 (s, 6H).  $^{13}\text{C NMR}$  (100 MHz,  $\text{CDCl}_3$ )  $\delta$  196.66, 168.05, 159.58, 135.79, 134.40, 132.23, 128.90, 127.62, 121.22, 110.12, 52.69, 42.45, 31.95, 28.12. **HRMS (ESI)**: Calcd for  $\text{C}_{15}\text{H}_{13}\text{ClO}_3$   $[\text{M}+\text{H}]^+$ : 277.0626; found: 277.0624

### 3,3-Dimethyl-3,4-dihydro-1H-naphtho[2,3-c]chromene-1,6(2H)-dione (3qa)

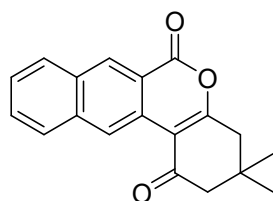

silica gel column chromatography (petroleum ether/ethyl acetate = 4:1), 43.2 mg, 74% yield, white solid. m.p. 181-183 °C.  $^1\text{H NMR}$  (400 MHz,  $\text{CDCl}_3$ )  $\delta$  9.48 (s, 1H), 8.86 (s, 1H), 7.97 (t,  $J = 9.1$  Hz, 2H), 7.63 (t,  $J = 7.5$  Hz, 1H), 7.55 (t,  $J = 7.5$  Hz, 1H), 2.80 (s, 2H), 2.55 (s, 2H), 1.19 (s, 6H).  $^{13}\text{C NMR}$  (100 MHz,  $\text{CDCl}_3$ )  $\delta$  197.24, 166.76, 160.90, 136.79, 131.90, 131.67, 129.45, 129.15, 128.92, 127.68, 127.14, 125.30, 117.92, 110.51, 52.84, 42.50, 31.90, 28.14. **HRMS (ESI)**: Calcd for  $\text{C}_{19}\text{H}_{16}\text{O}_3$   $[\text{M}+\text{H}]^+$ : 293.1172; found: 293.1169

**3,3-Dimethyl-3,4-dihydro-1*H*-[1,3]dioxolo[4',5':4,5]benzo[1,2-*c*]chromene-1,6(2*H*)-dione (3ra)**

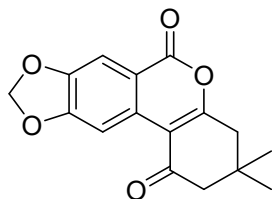

silica gel column chromatography (petroleum ether/ethyl acetate = 2:1), 30.9 mg, 54% yield, yellow solid. m.p. 163-165 °C. <sup>1</sup>H NMR (400 MHz, CDCl<sub>3</sub>) δ 7.95 (d, *J* = 8.4 Hz, 1H), 7.00 (d, *J* = 8.4 Hz, 1H), 6.14 (s, 2H), 2.73 (s, 2H), 2.53 (s, 2H), 1.16 (s, 6H). <sup>13</sup>C NMR (100 MHz, CDCl<sub>3</sub>) δ 193.90, 165.82, 160.03, 154.13, 142.26, 126.93, 115.33, 114.58, 111.05, 109.61, 102.04, 52.31, 42.31, 32.45, 28.29. HRMS (ESI): Calcd for C<sub>16</sub>H<sub>14</sub>O<sub>5</sub> [M+H]<sup>+</sup>: 287.0914; found: 287.0911

**7,7-Dimethyl-7,8-dihydro-4*H*-thieno[2,3-*c*]chromene-4,9(6*H*)-dione (3sa)**

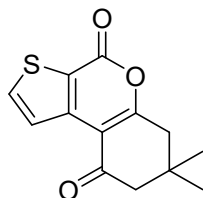

silica gel column chromatography (petroleum ether/ethyl acetate = 4:1), 42.2 mg, 85% yield, white solid. m.p. 125-127 °C. <sup>1</sup>H NMR (400 MHz, CDCl<sub>3</sub>) δ 8.18 (d, *J* = 5.2 Hz, 1H), 7.89 (d, *J* = 5.2 Hz, 1H), 2.80 (s, 2H), 2.48 (s, 2H), 1.16 (s, 6H). <sup>13</sup>C NMR (100 MHz, CDCl<sub>3</sub>) δ 194.99, 169.29, 156.70, 143.41, 137.69, 125.94, 122.75, 111.32, 51.43, 41.71, 32.35, 28.15. HRMS (ESI): Calcd for C<sub>13</sub>H<sub>12</sub>O<sub>3</sub>S [M+H]<sup>+</sup>: 249.0580; found: 249.0576

**7,7-Dimethyl-7,8-dihydro-4*H*-furo[2,3-*c*]chromene-4,9(6*H*)-dione (3ta)**

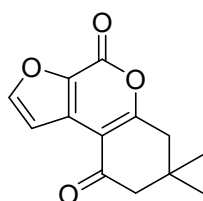

silica gel column chromatography (petroleum ether/ethyl acetate = 2:1), 17.2 mg, 37% yield, white solid. m.p. 148-150 °C. <sup>1</sup>H NMR (400 MHz, CDCl<sub>3</sub>) δ 7.85 (d, *J* = 1.0 Hz, 1H), 7.37 (d, *J* = 1.0 Hz, 1H), 2.78 (s, 2H), 2.47 (s, 2H), 1.17 (s, 6H). <sup>13</sup>C NMR (100 MHz, CDCl<sub>3</sub>) δ 195.02, 168.98, 151.34, 136.82, 132.47, 110.12, 109.10, 99.95, 50.97, 41.60, 32.85, 28.24. HRMS (ESI): Calcd for C<sub>13</sub>H<sub>12</sub>O<sub>4</sub> [M+H]<sup>+</sup>: 233.0808; found: 233.0807

**8,9-Dichloro-3,3-dimethyl-3,4-dihydro-1*H*-benzo[*c*]chromene-1,6(2*H*)-dione (3ua)**

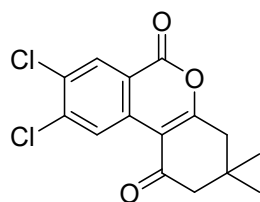

silica gel column chromatography (petroleum ether/ethyl acetate = 4:1), 18.6 mg, 30% yield, yellow solid. m.p. 163-165 °C. <sup>1</sup>H NMR (400 MHz, CDCl<sub>3</sub>) δ 9.24 (s, 1H), 8.32 (s, 1H), 2.79 (s, 2H), 2.52 (s, 2H), 1.18 (s, 6H). <sup>13</sup>C NMR (100 MHz, CDCl<sub>3</sub>) δ 196.30, 169.07, 158.91, 141.00, 132.96, 132.92, 130.81, 127.87, 119.34, 109.31, 52.51, 42.49, 31.93, 28.09. HRMS (ESI): Calcd for C<sub>15</sub>H<sub>12</sub>Cl<sub>2</sub>O<sub>3</sub> [M+H]<sup>+</sup>: 311.0236; found: 311.0235

**7,7-Dimethyl-4-phenyl-7,8-dihydro-2*H*-chromene-2,5(6*H*)-dione (3va)**

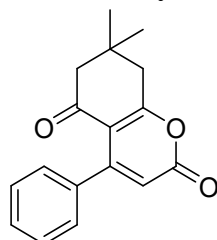

silica gel column chromatography (petroleum ether/ethyl acetate = 4:1), 29.5 mg, 55% yield, yellow liquid. m.p. 110-112 °C. <sup>1</sup>H NMR (400 MHz, CDCl<sub>3</sub>) δ 7.43 – 7.35 (m, 3H), 7.22 – 7.14 (m, 2H), 6.08 (s, 1H), 2.81 (s, 2H), 2.42 (s, 2H), 1.16 (s, 6H). <sup>13</sup>C NMR (100 MHz, CDCl<sub>3</sub>) δ 193.31, 173.37, 159.77, 156.35, 136.99, 128.88, 127.87, 127.07, 114.15, 113.18, 52.21, 42.71, 32.01, 28.15. HRMS (ESI): Calcd for C<sub>17</sub>H<sub>16</sub>O<sub>3</sub> [M+H]<sup>+</sup>: 269.1172; found: 269.1172

**3,4-Dihydro-1*H*-benzo[*c*]chromene-1,6(2*H*)-dione (3ab)<sup>[3]</sup>**

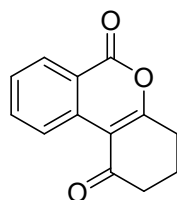

silica gel column chromatography (petroleum ether/ethyl acetate = 4:1), 31.3 mg, 73% yield, pale yellow solid. <sup>1</sup>H NMR (400 MHz, CDCl<sub>3</sub>) δ 9.01 (d, *J* = 8.2 Hz, 1H), 8.24 (d, *J* = 7.8 Hz, 1H), 7.76 (t, *J* = 7.6 Hz, 1H), 7.50 (t, *J* = 7.5 Hz, 1H), 2.92 (t, *J* = 5.5 Hz, 2H), 2.64 (t, *J* = 5.9 Hz, 2H), 2.26 – 2.04 (m, 2H). <sup>13</sup>C NMR (100 MHz, CDCl<sub>3</sub>) δ 196.83, 169.40, 160.37, 135.54, 133.95, 129.47, 128.33, 125.95, 119.78, 111.49, 38.87, 28.90, 19.92.

### 3-Methyl-3,4-dihydro-1*H*-benzo[*c*]chromene-1,6(2*H*)-dione (3ac)<sup>[3]</sup>

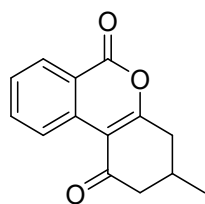

silica gel column chromatography (petroleum ether/ethyl acetate = 4:1), 36.9 mg, 81% yield, yellow solid. <sup>1</sup>H NMR (400 MHz, CDCl<sub>3</sub>) δ 9.02 (d, *J* = 8.3 Hz, 1H), 8.24 (d, *J* = 7.9 Hz, 1H), 7.76 (t, *J* = 7.7 Hz, 1H), 7.50 (t, *J* = 7.5 Hz, 1H), 2.92 (d, *J* = 18.4 Hz, 1H), 2.80 – 2.56 (m, 2H), 2.52 – 2.26 (m, 2H), 1.17 (d, *J* = 5.6 Hz, 3H). <sup>13</sup>C NMR (100 MHz, CDCl<sub>3</sub>) δ 196.83, 168.84, 160.45, 135.54, 133.86, 129.48, 128.33, 125.82, 119.71, 111.04, 47.07, 36.76, 27.62, 20.71.

### 3-Isopropyl-3,4-dihydro-1*H*-benzo[*c*]chromene-1,6(2*H*)-dione (3ad)<sup>[4]</sup>

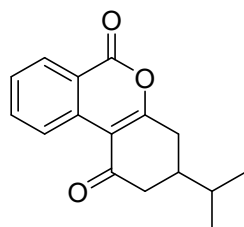

silica gel column chromatography (petroleum ether/ethyl acetate = 4:1), 40.9 mg, 80% yield, white solid. <sup>1</sup>H NMR (400 MHz, CDCl<sub>3</sub>) δ 8.99 (d, *J* = 8.3 Hz, 1H), 8.22 (d, *J* = 7.9 Hz, 1H), 7.75 (t, *J* = 8.3 Hz, 1H), 7.49 (t, *J* = 7.6 Hz, 1H), 2.88 (dd, *J* = 18.2, 4.6 Hz, 1H), 2.76 - 2.63 (m, 2H), 2.36 (dd, *J* = 15.8, 13.3 Hz, 1H), 2.04 (qd, *J* = 11.1, 4.5 Hz, 1H), 1.67 (dq, *J* = 13.4, 6.7 Hz, 1H), 0.98 (d, *J* = 6.7 Hz, 6H). <sup>13</sup>C NMR (100 MHz, CDCl<sub>3</sub>) δ 197.20, 169.42, 160.40, 135.50, 133.80, 129.44, 128.28, 125.73, 119.62, 110.98, 43.02, 38.69, 32.72, 31.73, 19.41, 19.35.

### 3-Phenyl-3,4-dihydro-1*H*-benzo[*c*]chromene-1,6(2*H*)-dione (3ae)<sup>[3]</sup>

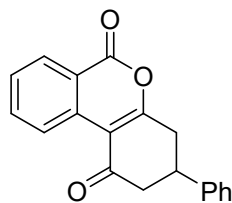

silica gel column chromatography (petroleum ether/ethyl acetate = 4:1), 48.1 mg, 83% yield, yellow solid. <sup>1</sup>H NMR (400 MHz, CDCl<sub>3</sub>) δ 9.08 (d, *J* = 8.2 Hz, 1H), 8.29 (d, *J* = 7.9 Hz, 1H), 7.81 (t, *J* = 7.7 Hz, 1H), 7.55 (t, *J* = 7.5 Hz, 1H), 7.39 (t, *J* = 7.2 Hz, 2H), 7.30 (d, *J* = 7.1 Hz, 3H), 3.56 (s, 1H), 3.27 – 3.00 (m, 2H), 3.03 – 2.76 (m, 2H). <sup>13</sup>C NMR (100 MHz, CDCl<sub>3</sub>) δ 195.99, 168.55, 160.34, 141.36, 135.69, 133.75, 129.61, 129.00, 128.54, 127.47, 126.53, 125.92, 119.78, 111.29, 45.84, 37.91, 36.30.

### 3-(*p*-tolyl)-3,4-dihydro-1H-benzo[*c*]chromene-1,6(2H)-dione (3af)<sup>[5]</sup>

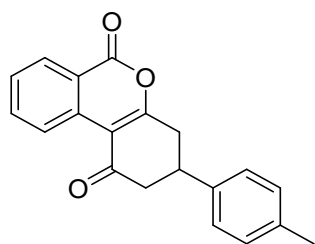

silica gel column chromatography (petroleum ether/ethyl acetate = 4:1), 31.0 mg, 51% yield, white solid. <sup>1</sup>H NMR (400 MHz, CDCl<sub>3</sub>) δ 9.08 (d, *J* = 8.3 Hz, 1H), 8.29 (d, *J* = 7.9 Hz, 1H), 7.80 (t, *J* = 8.4 Hz, 1H), 7.54 (t, *J* = 7.6 Hz, 1H), 3.60 – 3.45 (m, 1H), 3.20 – 3.08 (m, 2H), 2.98 – 2.78 (m, 2H), 2.36 (s, 3H). <sup>13</sup>C NMR (100 MHz, CDCl<sub>3</sub>) δ 196.13, 168.63, 160.37, 138.39, 137.15, 135.67, 133.77, 129.62, 129.59, 128.50, 126.39, 125.91, 119.76, 111.25, 45.96, 37.55, 36.43, 21.00.

### 2,3-Dihydrocyclopenta[*c*]isochromene-1,5-dione (3ag)<sup>[3]</sup>

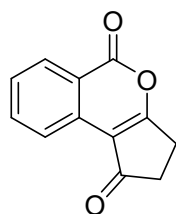

silica gel column chromatography (petroleum ether/ethyl acetate = 4:1), 23.6 mg, 59% yield, white solid. <sup>1</sup>H NMR (400 MHz, CDCl<sub>3</sub>) δ 8.48 (d, *J* = 7.8 Hz, 1H), 8.26 (d, *J* = 7.9 Hz, 1H), 7.80 (t, *J* = 7.4 Hz, 1H), 7.56 (t, *J* = 7.5 Hz, 1H), 3.02 (s, 2H), 2.75 (d, *J* = 3.7 Hz, 2H). <sup>13</sup>C NMR (100 MHz, CDCl<sub>3</sub>) δ 200.32, 180.41, 161.05, 135.83, 131.84, 130.39, 129.04, 123.21, 118.57, 114.51, 34.56, 25.76.

## 5. References

- (1) Yu, Q.; Zhang, Y.-T.; Wan, J.-P. *Green Chem.* **2019**, *21*, 3436
- (2) Moriarty, R. M.; Tyagi, S.; Ivanov, D.; Constantinescu, M. *J. Am. Chem. Soc.* **2008**, *130*, 7564
- (3) Z. Dong, P. Li, X.-W. Li, B.-X. Liu, *Chin. J. Chem.* **2021**, *39*, 2489
- (4) X. Fan, Y. He, L. Cui, S. Guo, J. Wang, X. Zhang, *Eur. J. Org. Chem.* **2012**, *2012*, 673
- (5) S. Kumar, S. Nunewar, V. Kanchupalli, *Asian J. Org. Chem.* **2021**, *11*, e202100689

## 6. Copies of <sup>1</sup>H, <sup>13</sup>C, and <sup>19</sup>F NMR of products



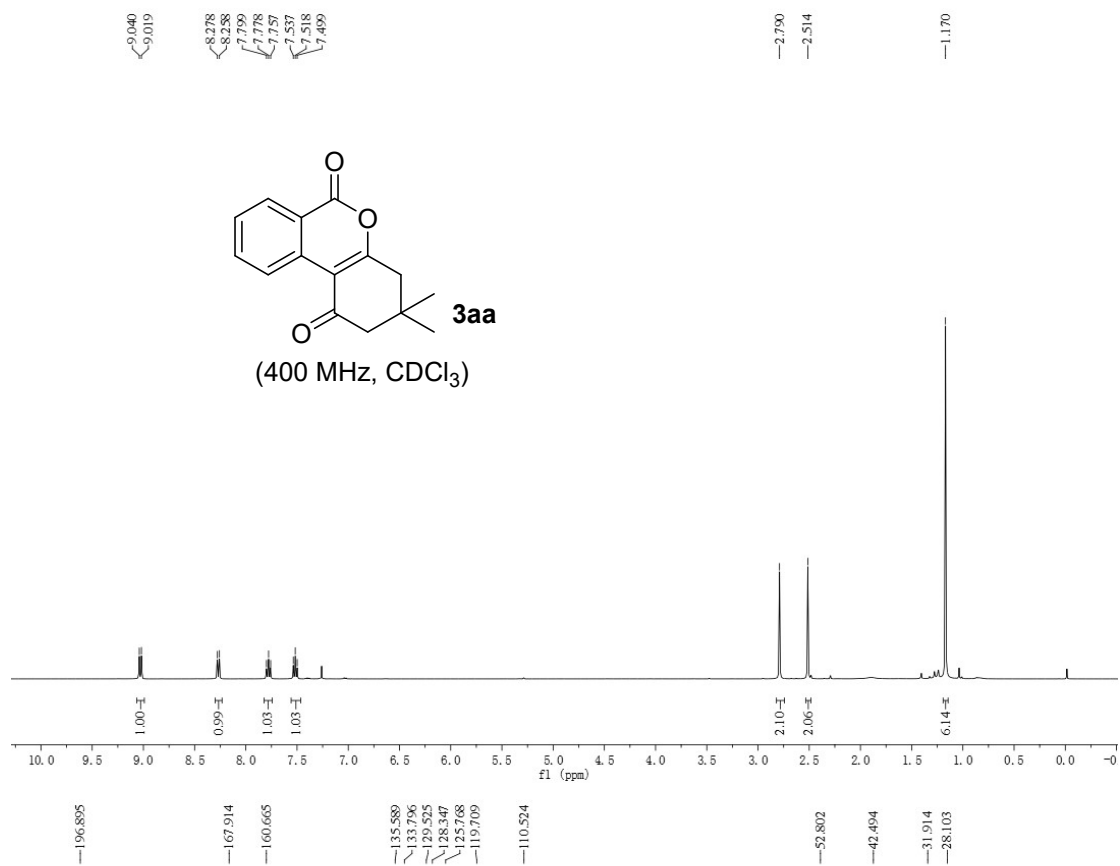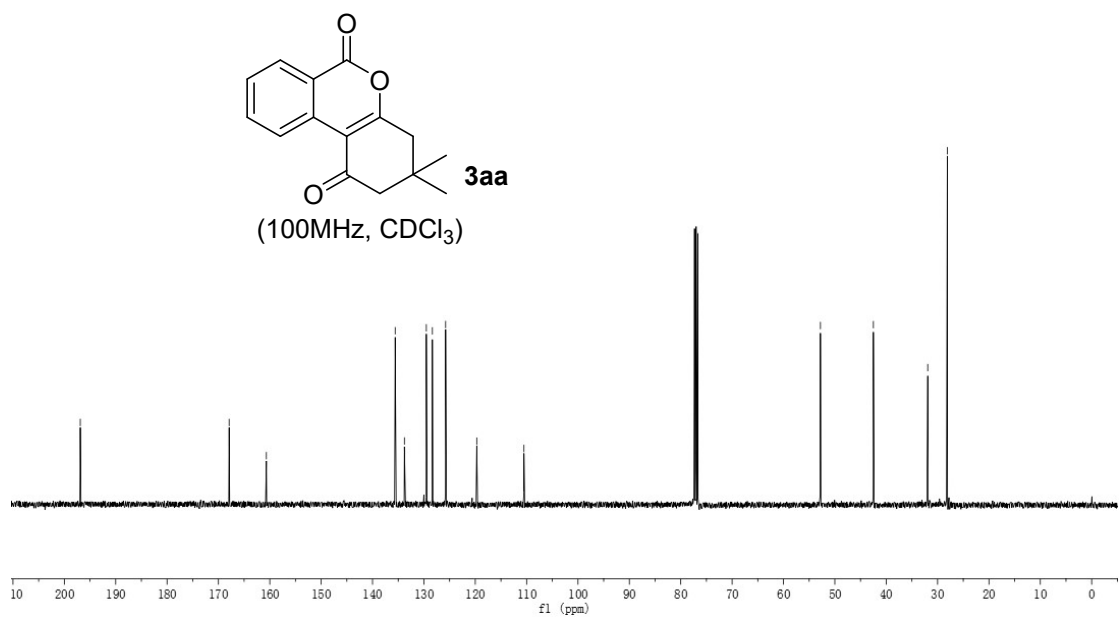

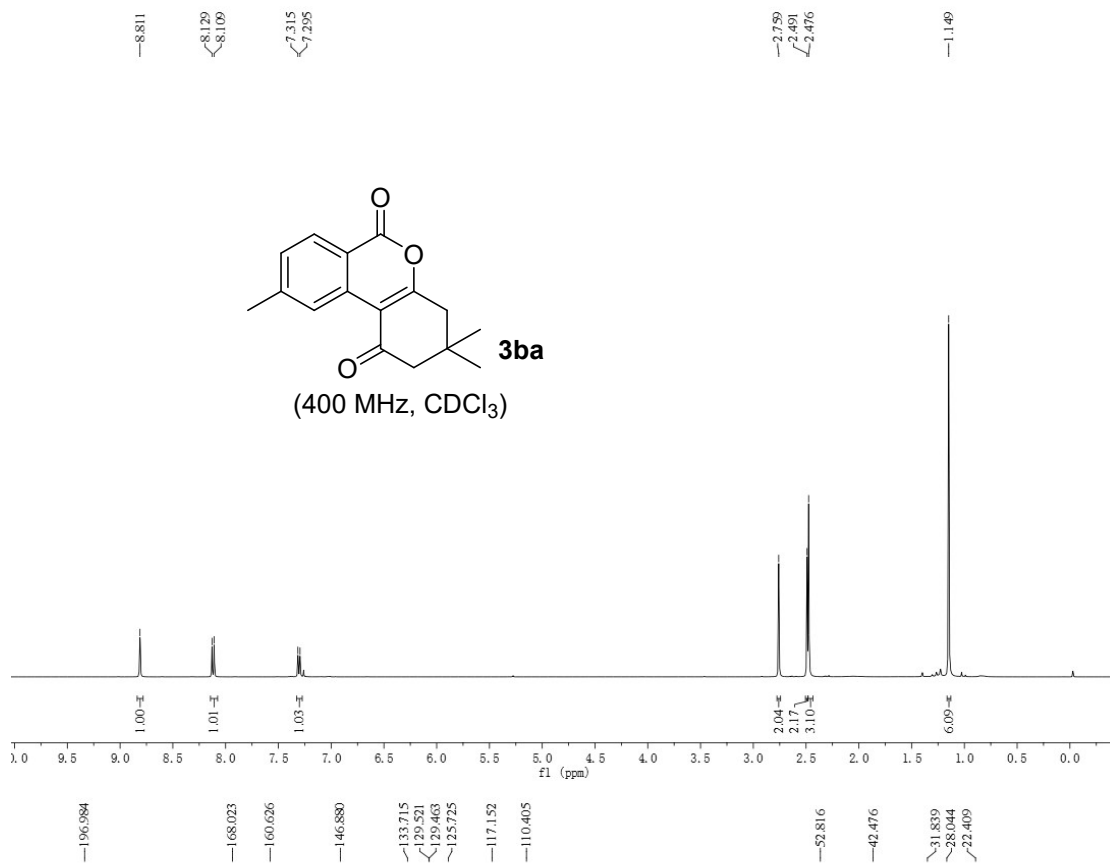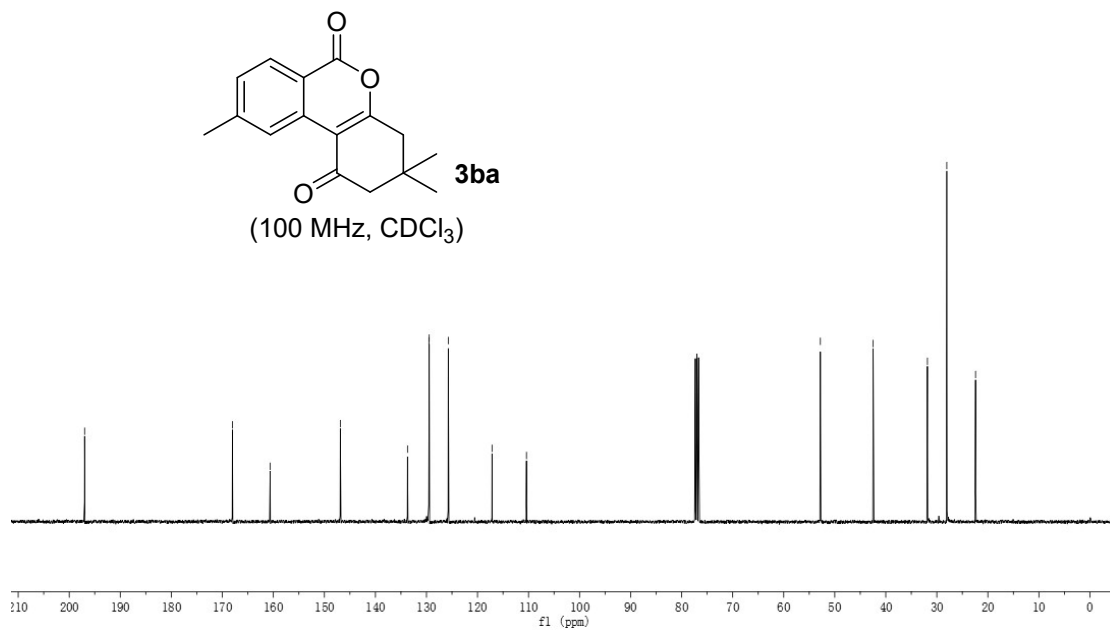

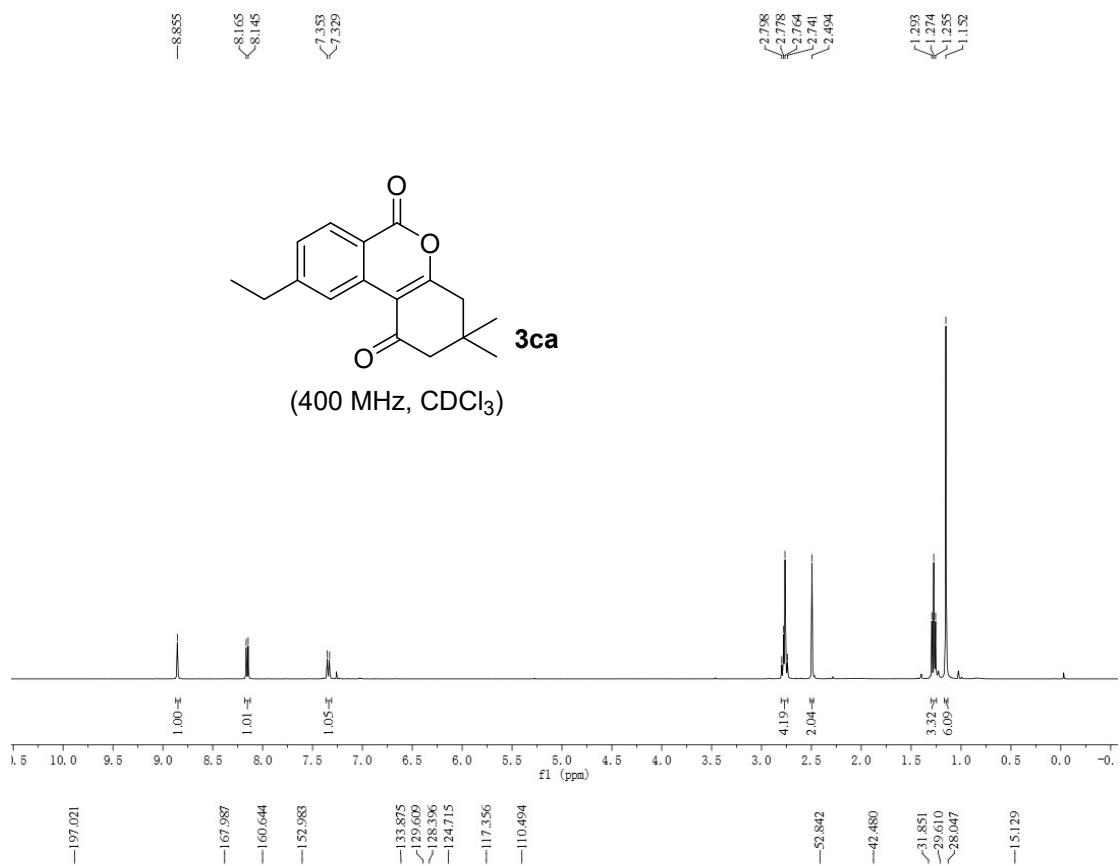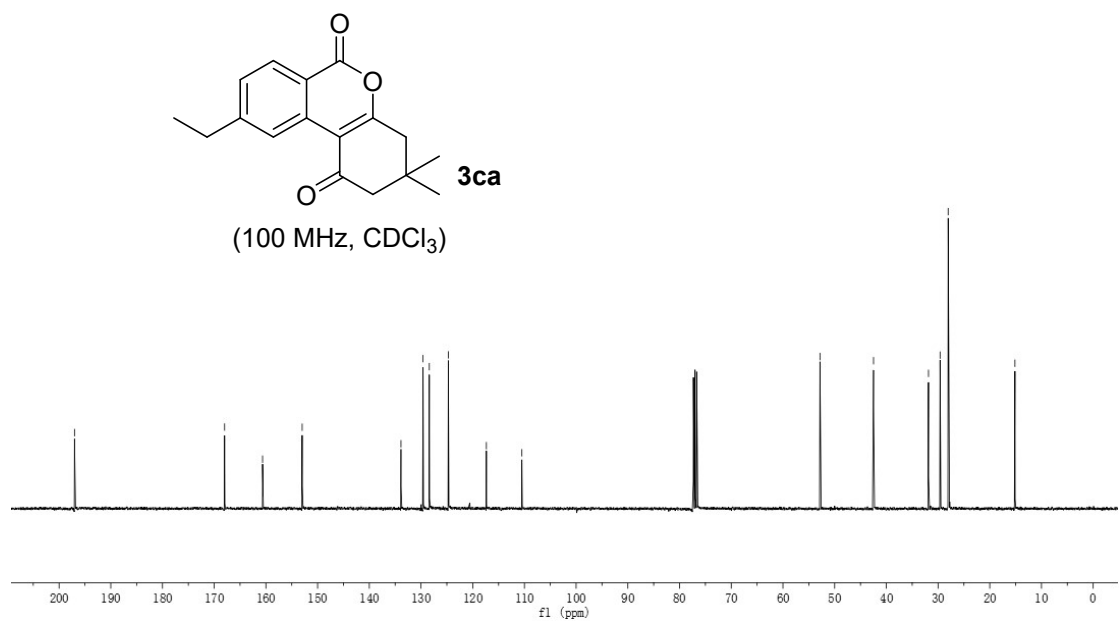

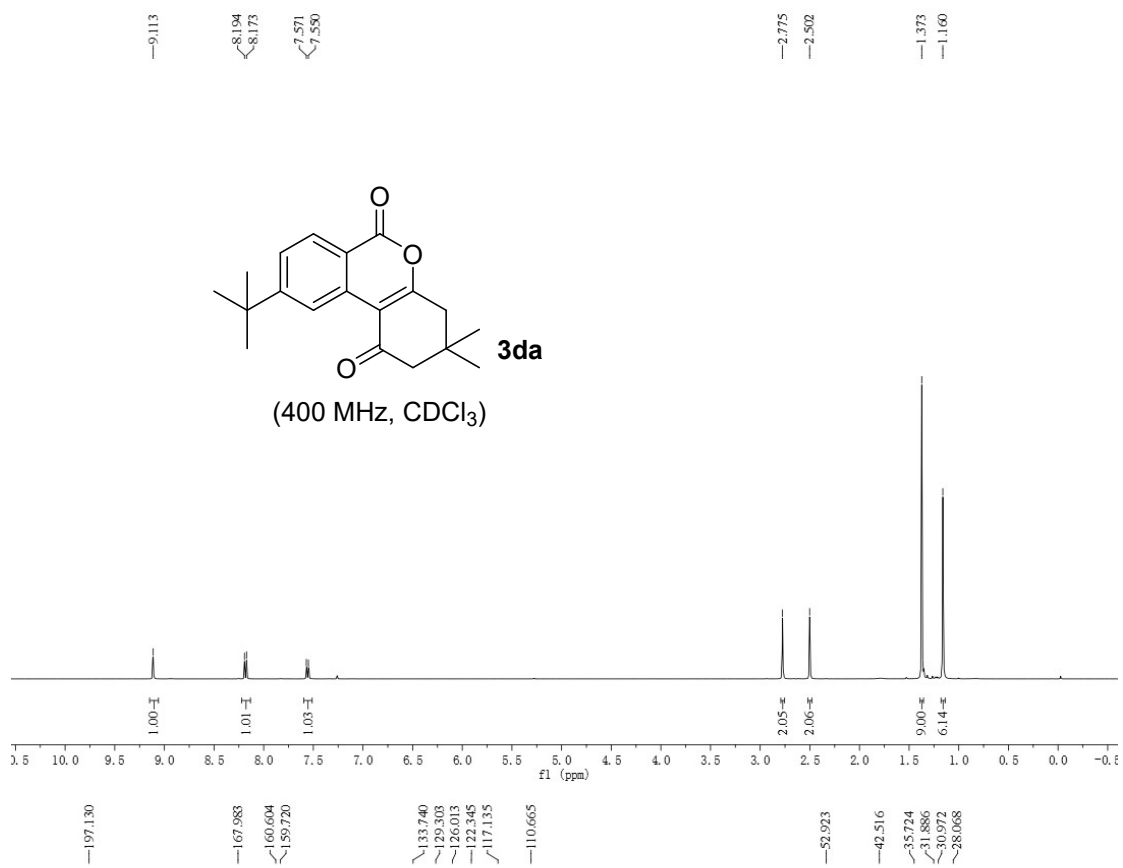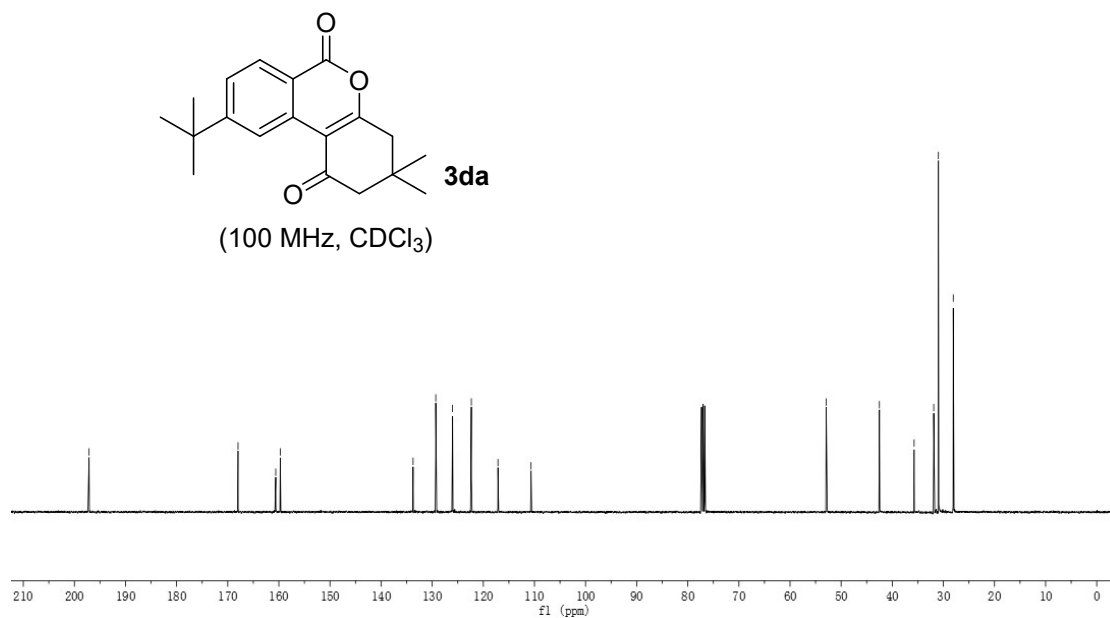

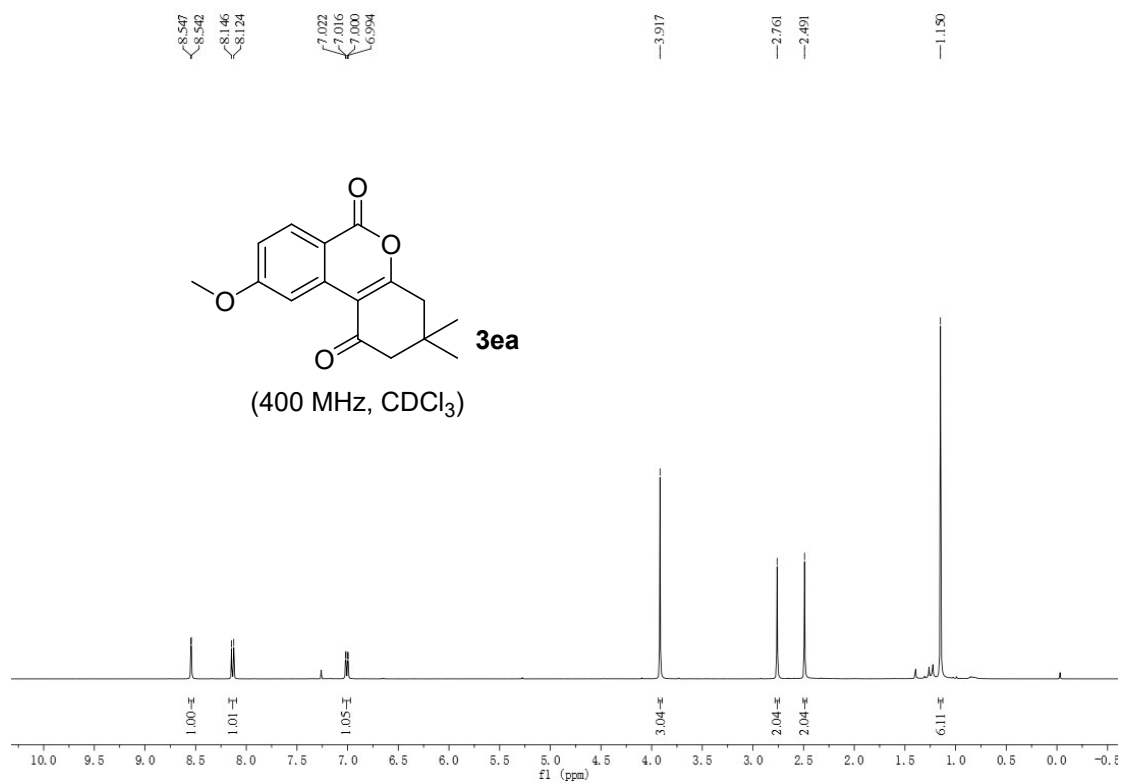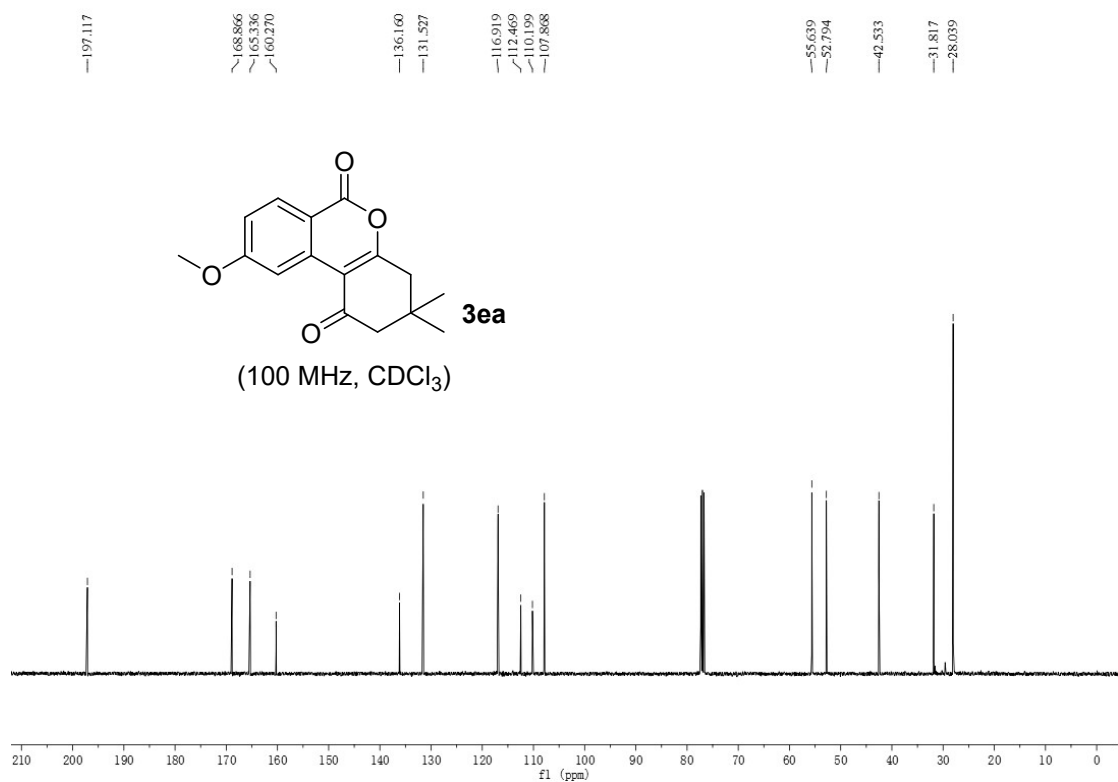

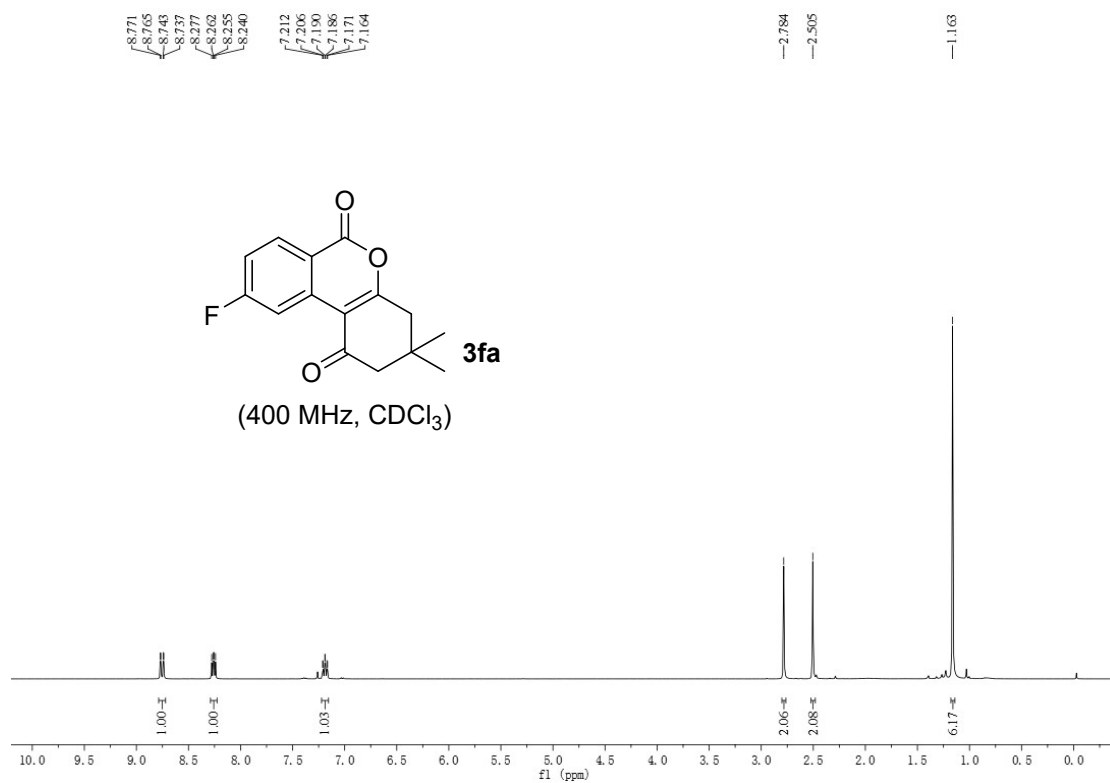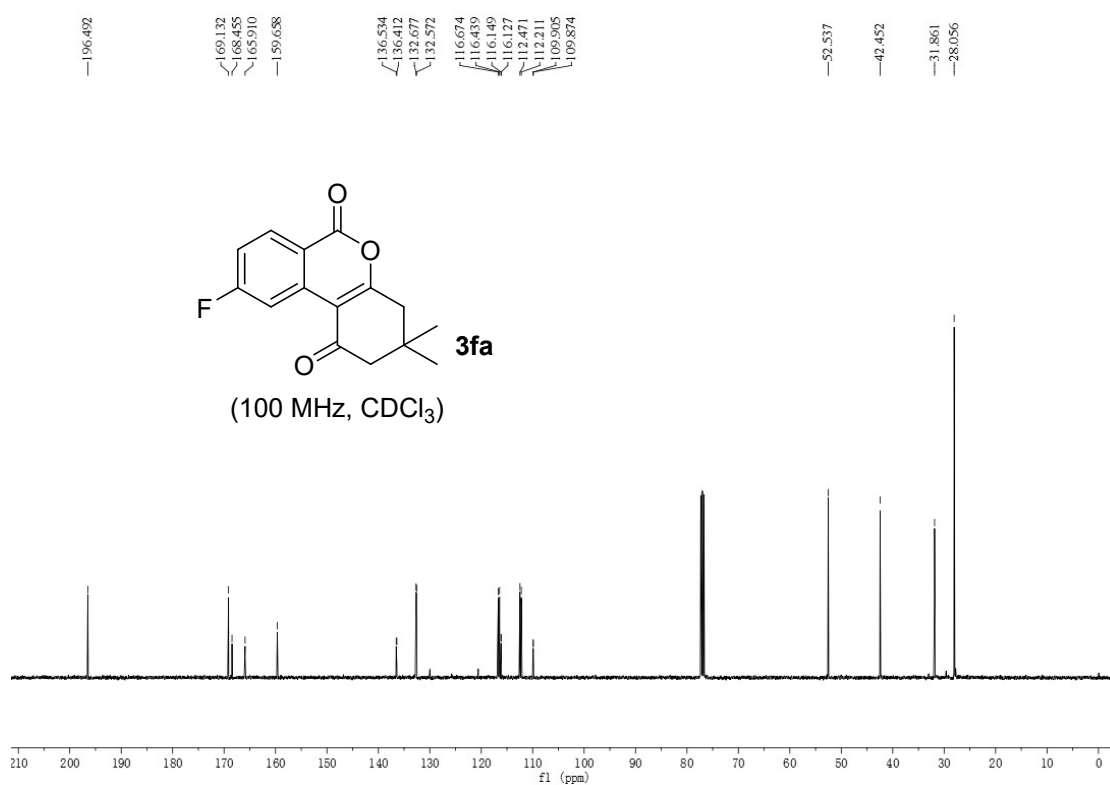

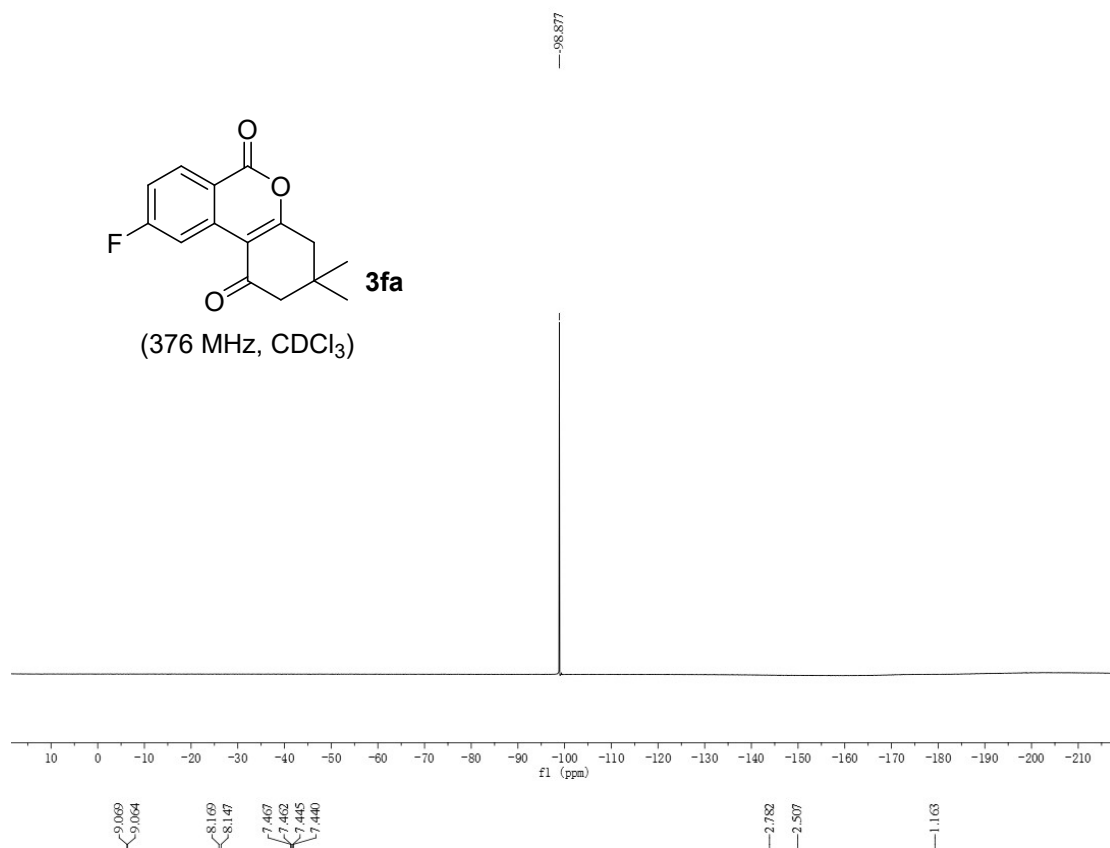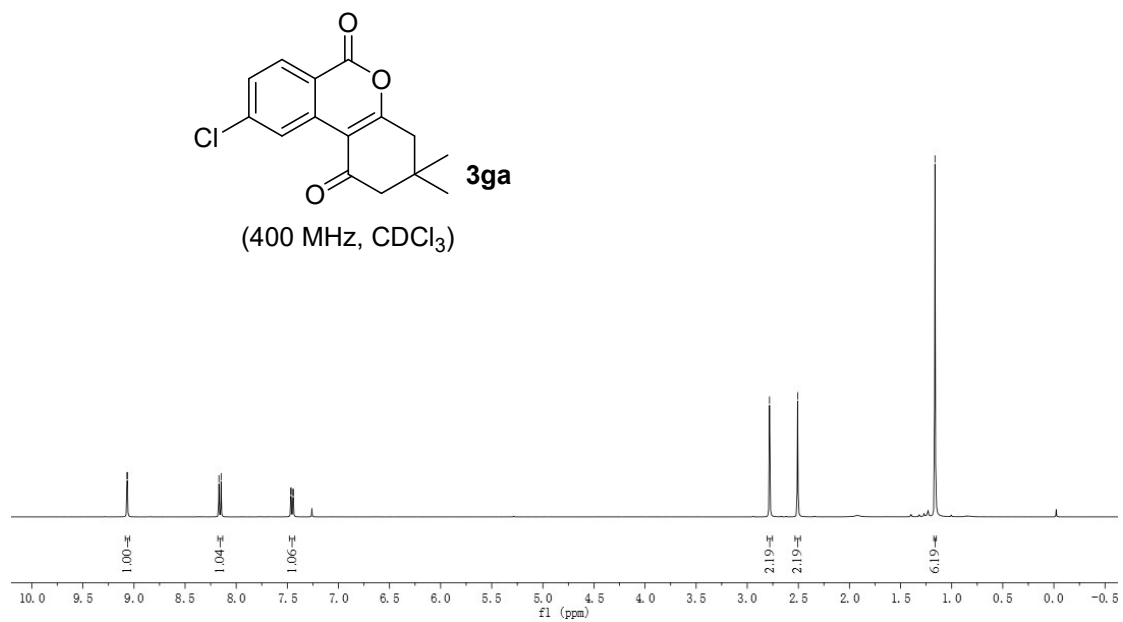

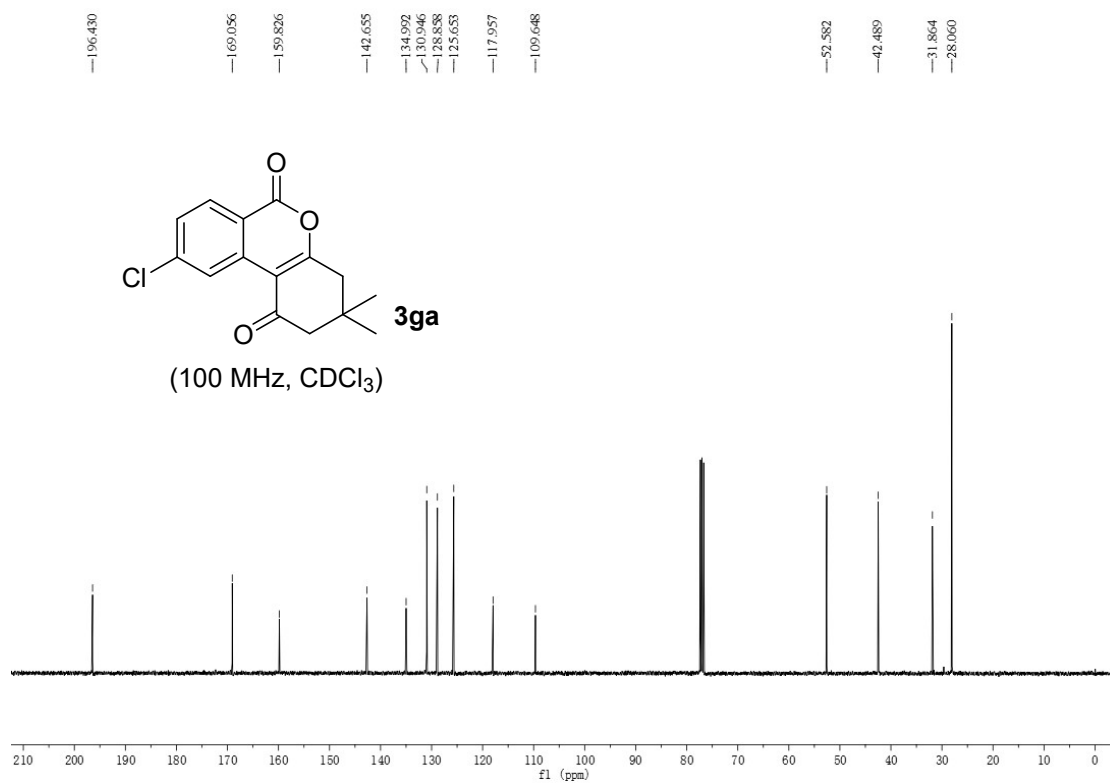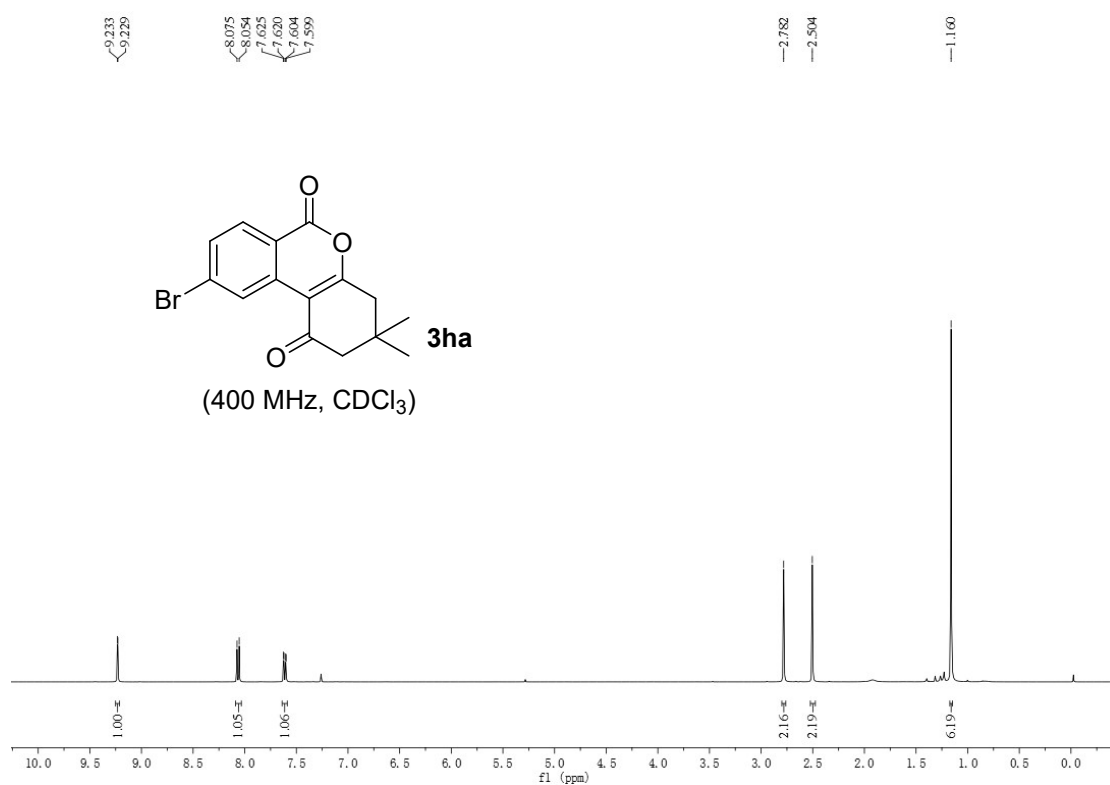



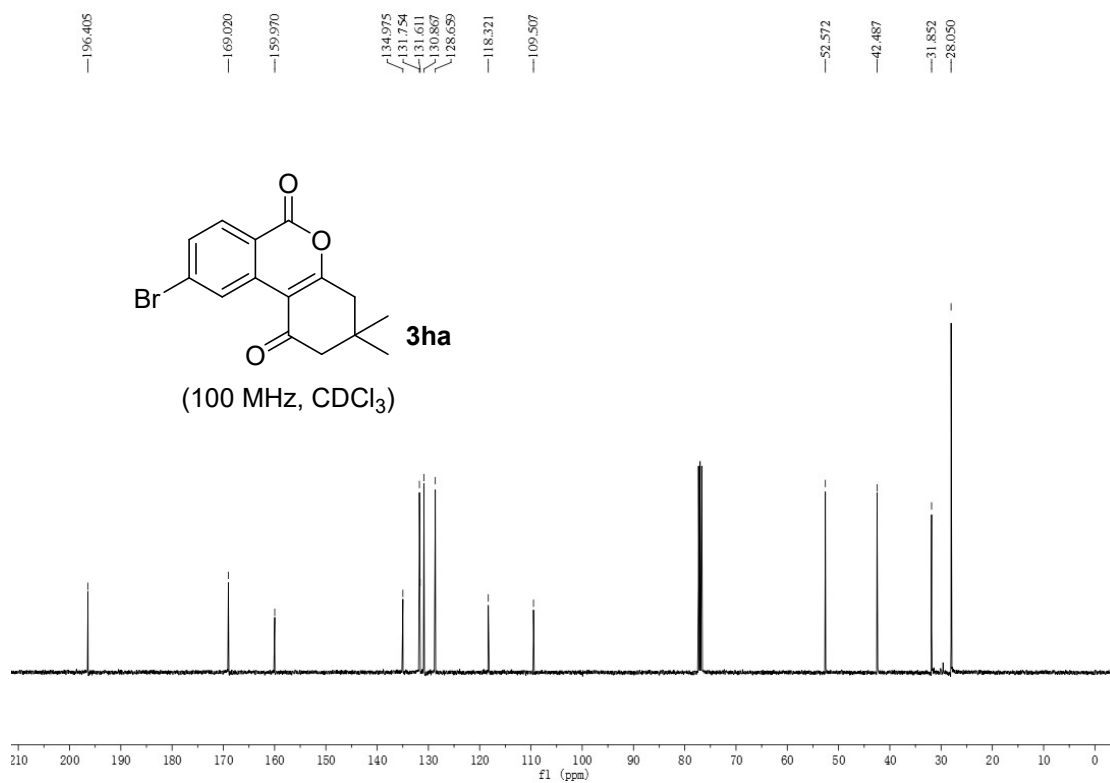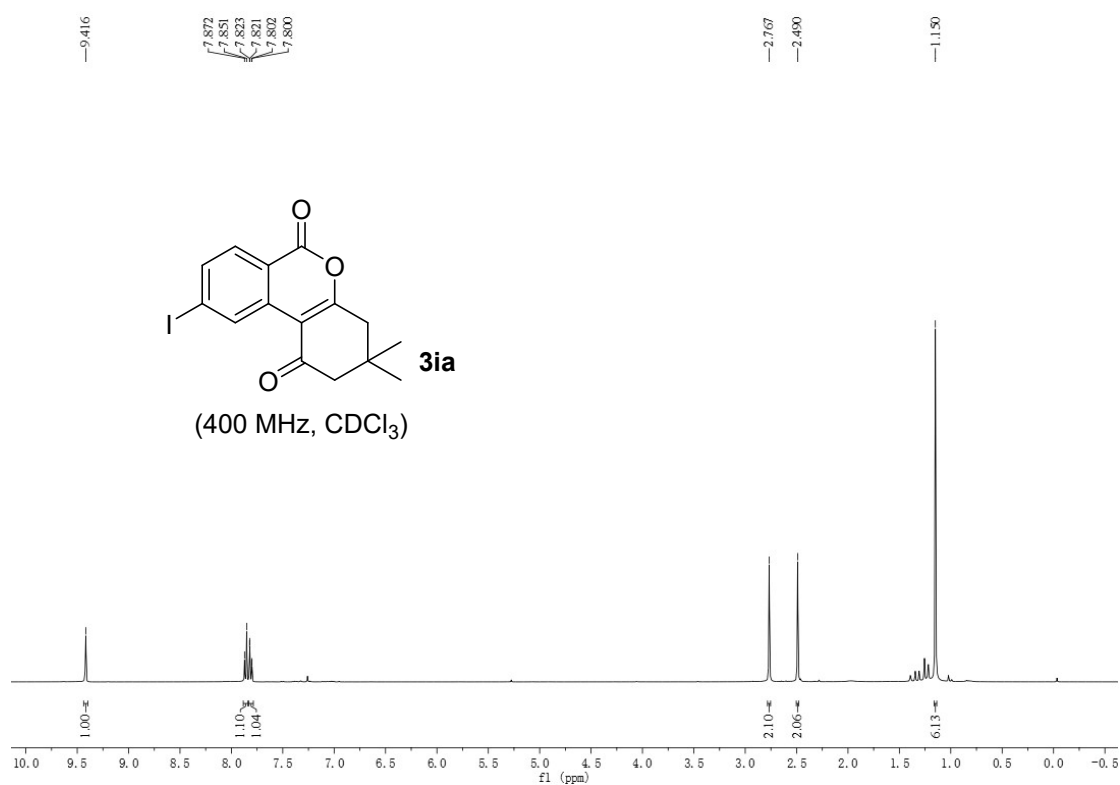

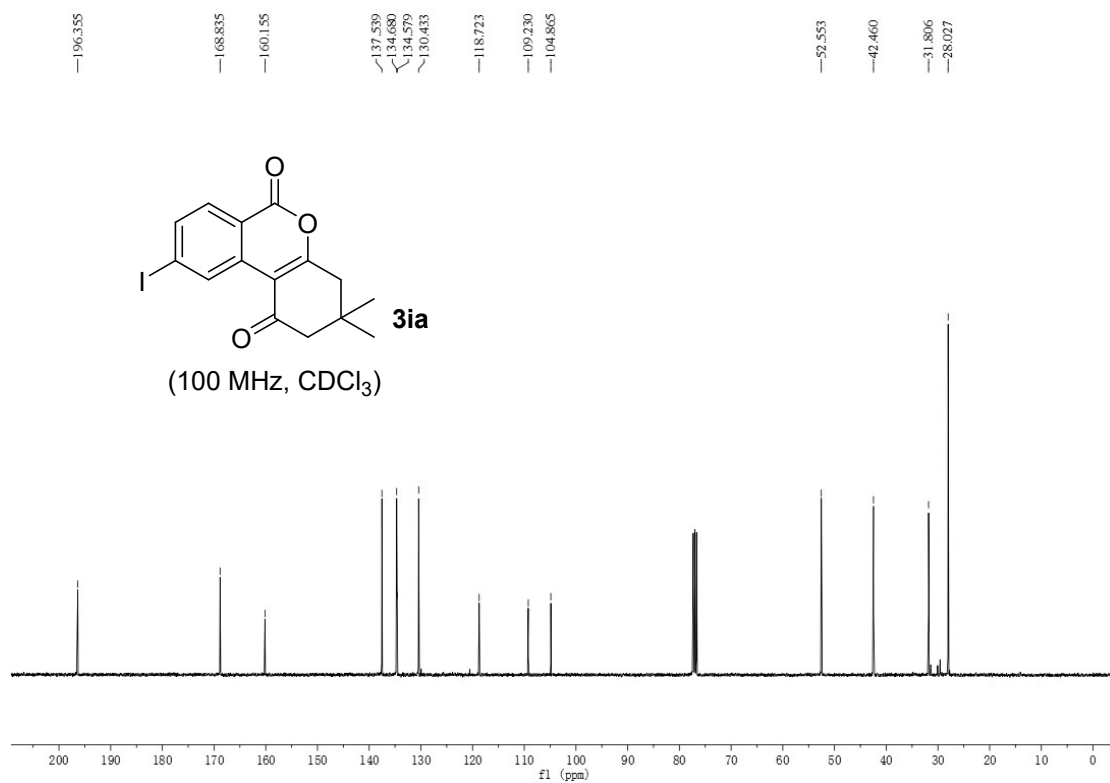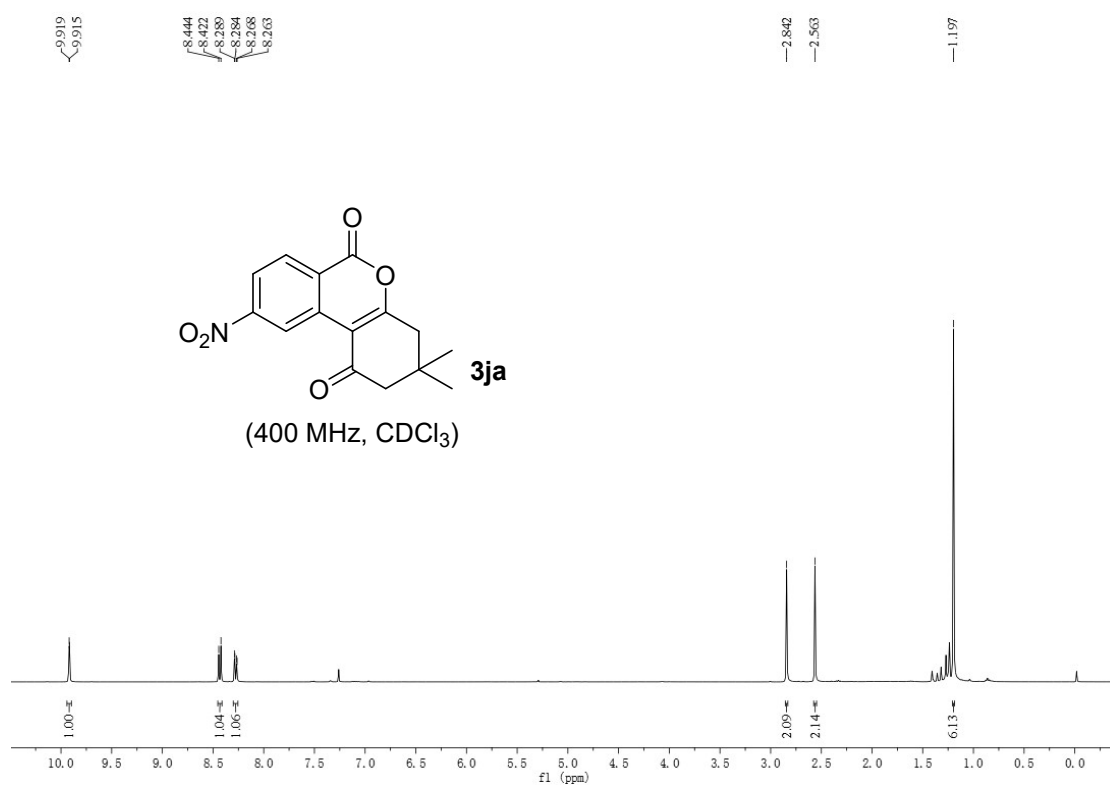

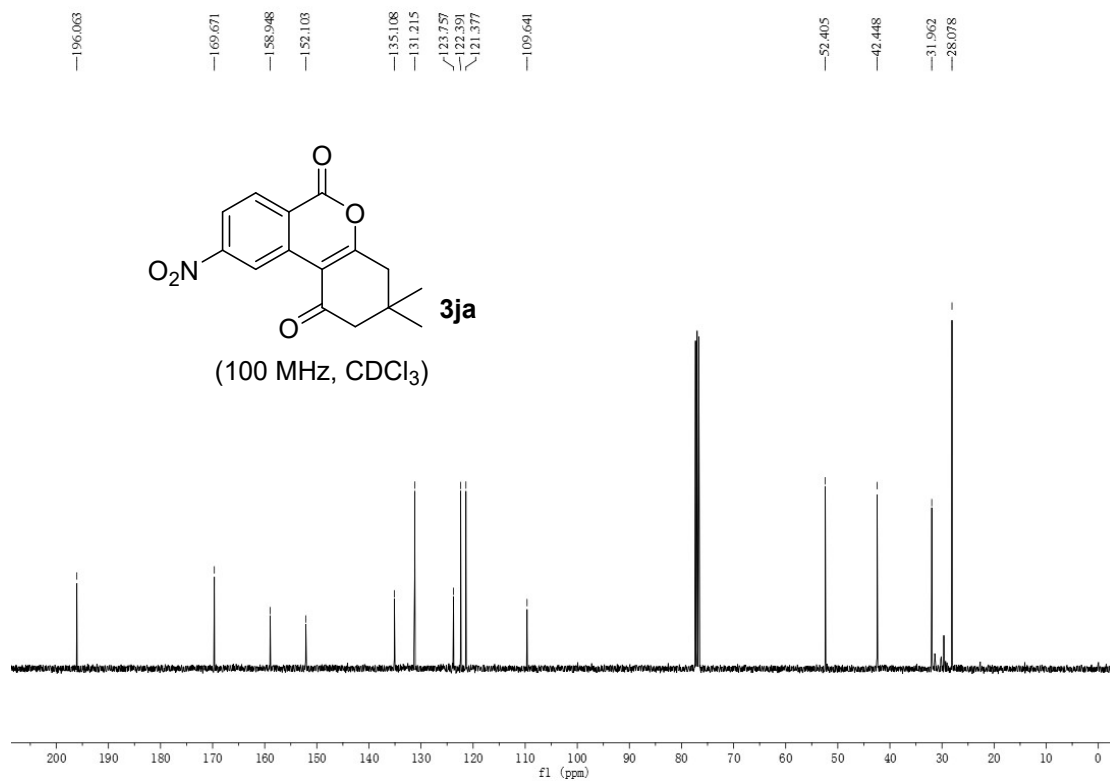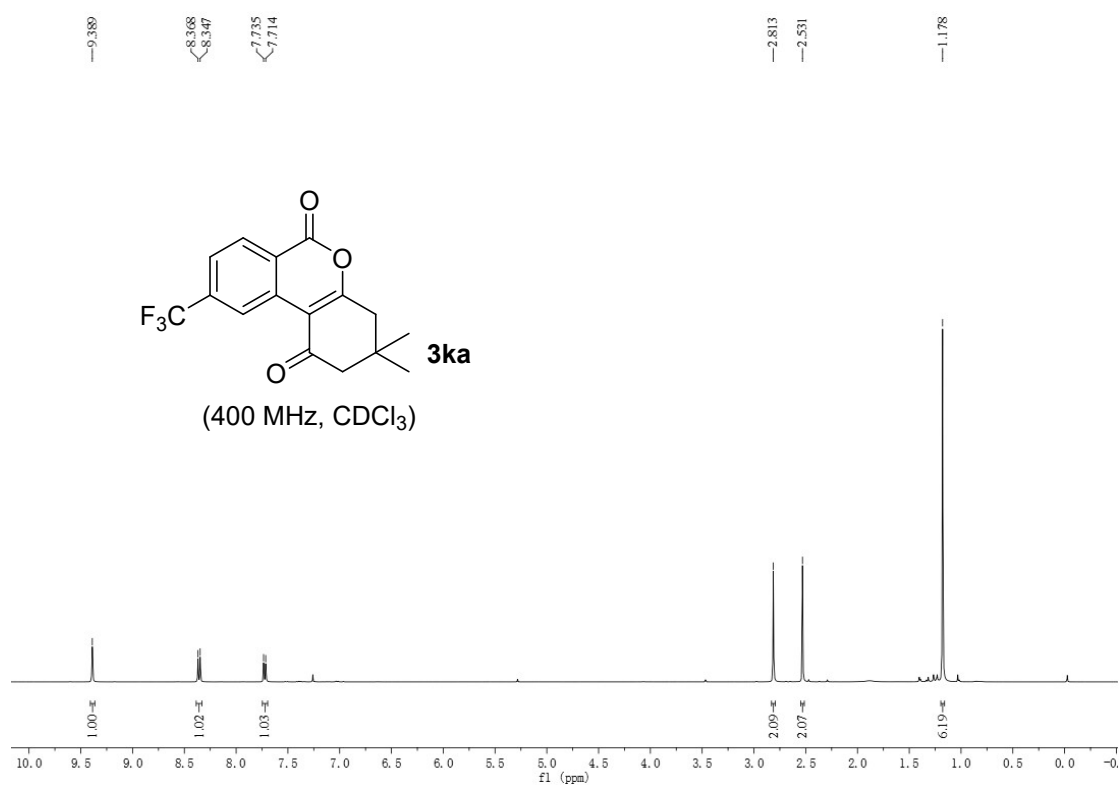

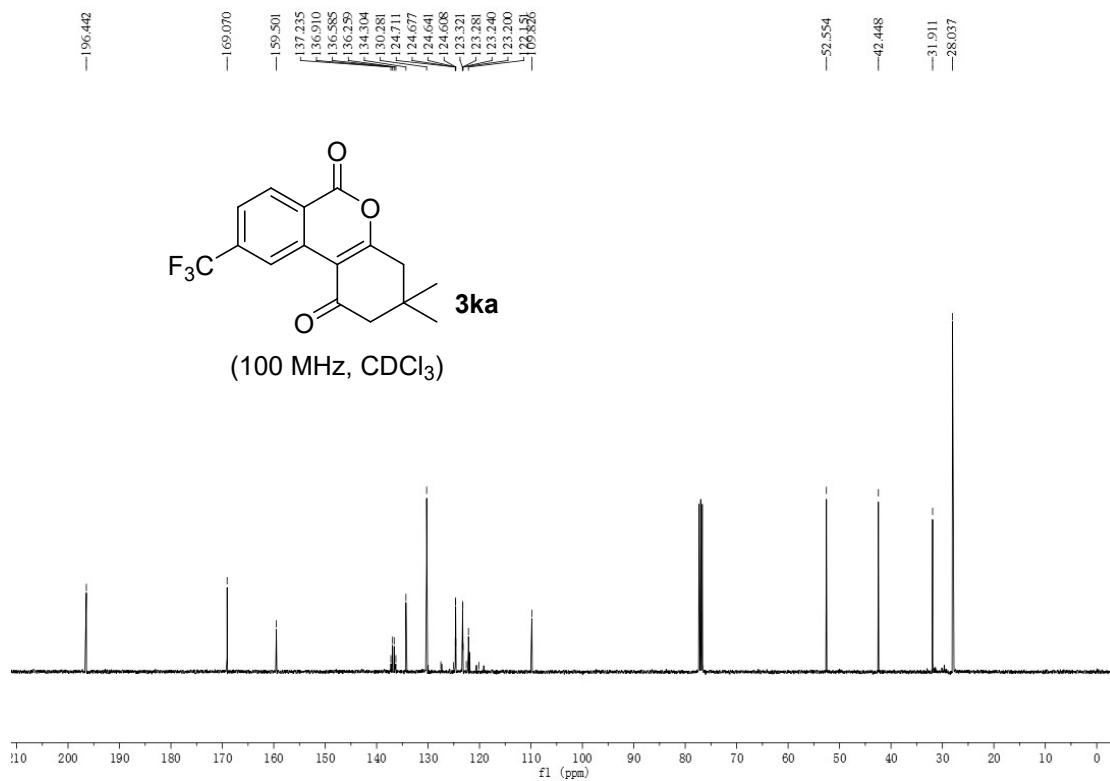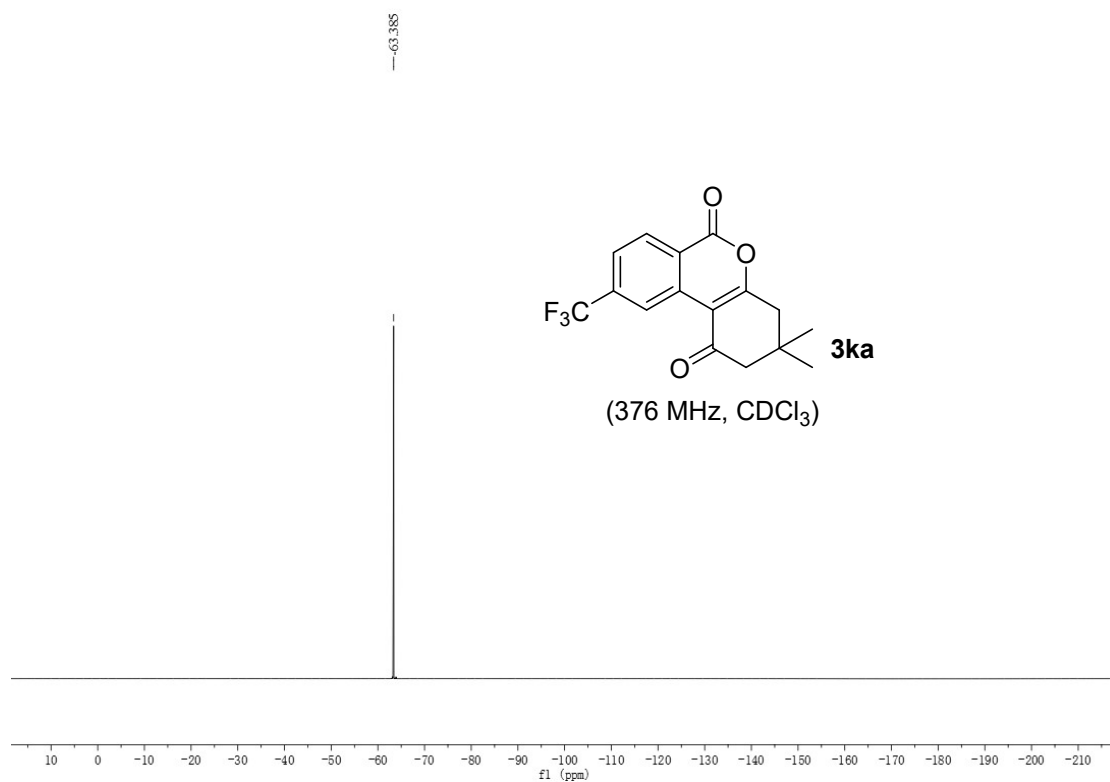

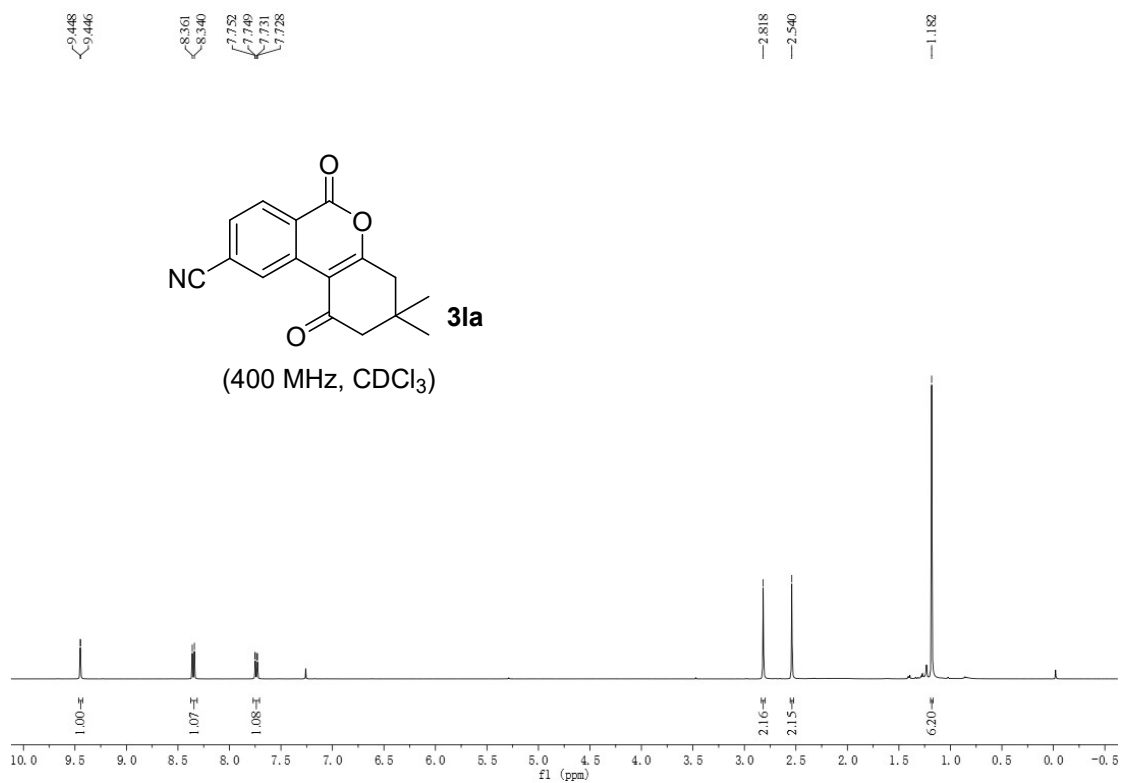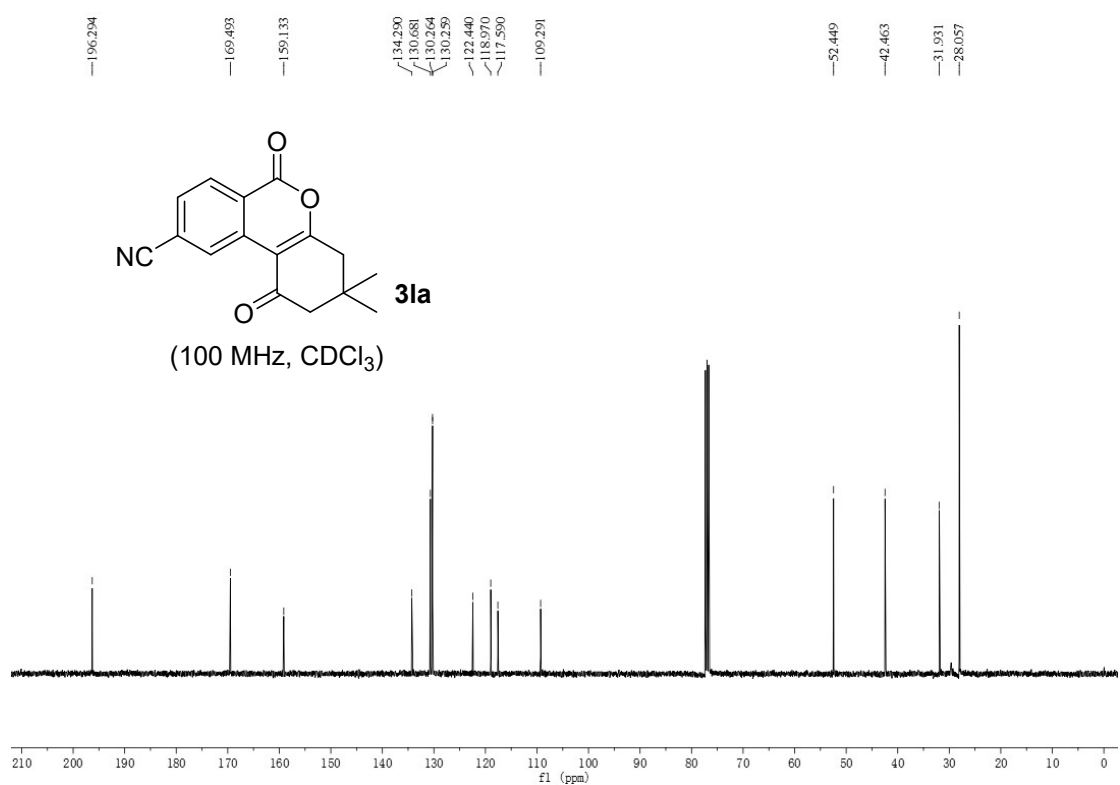

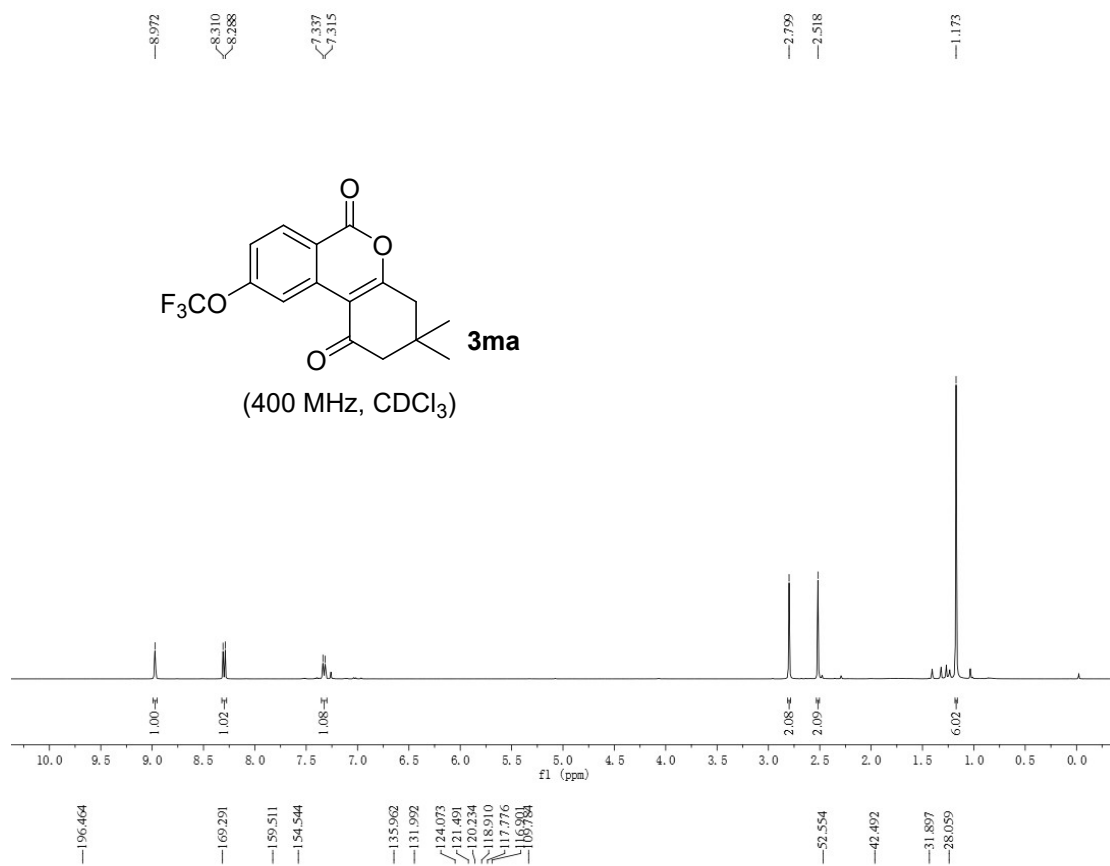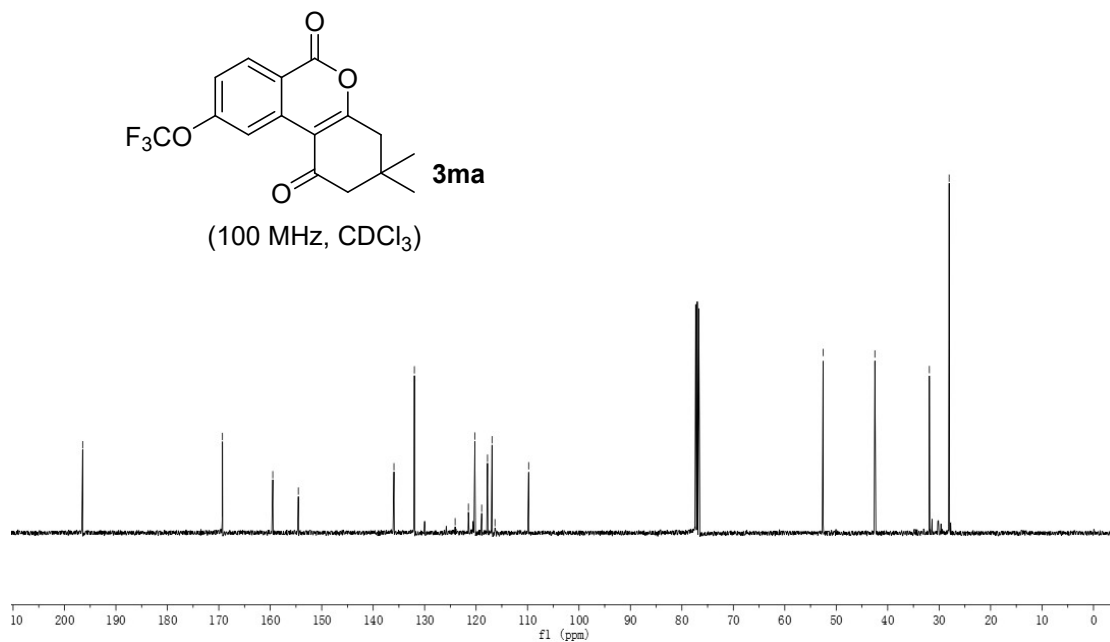

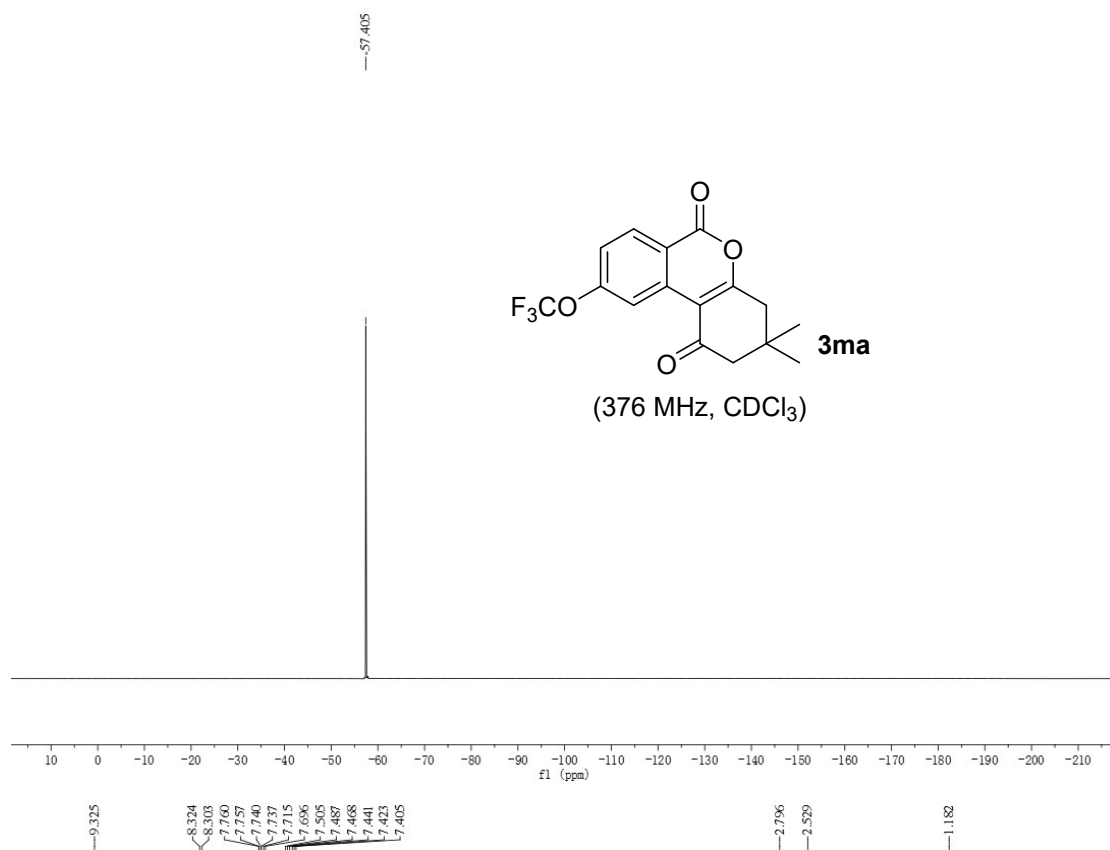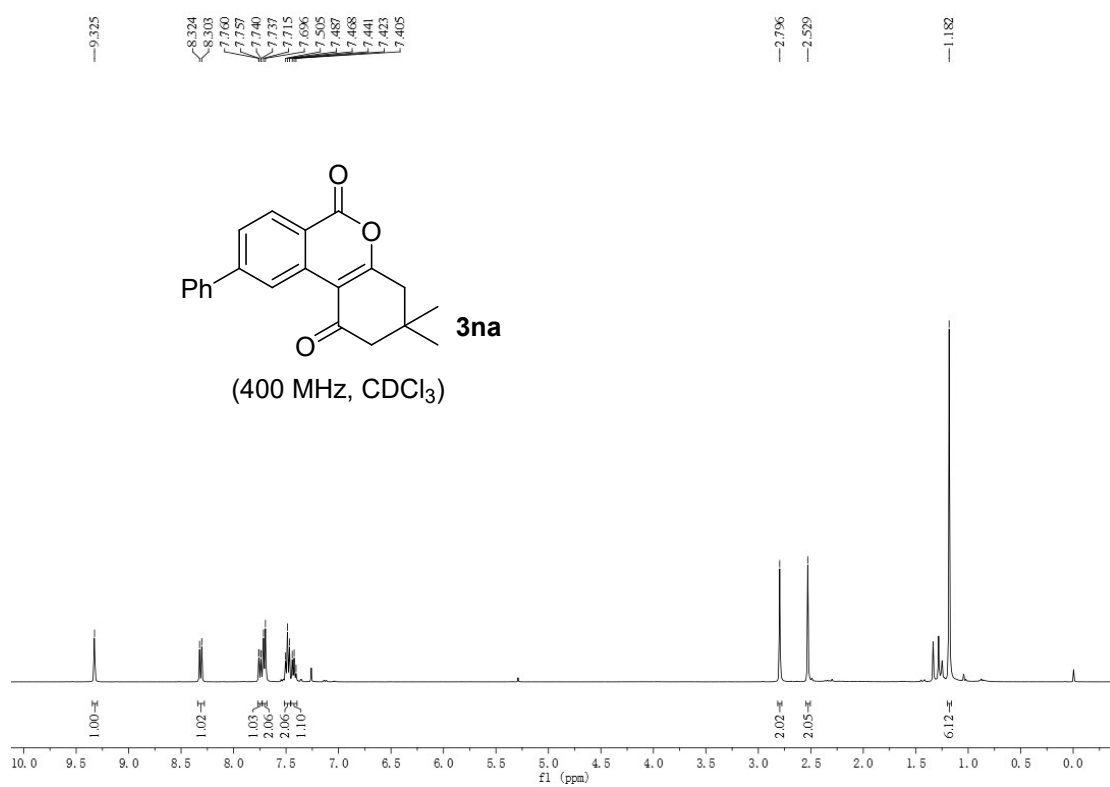

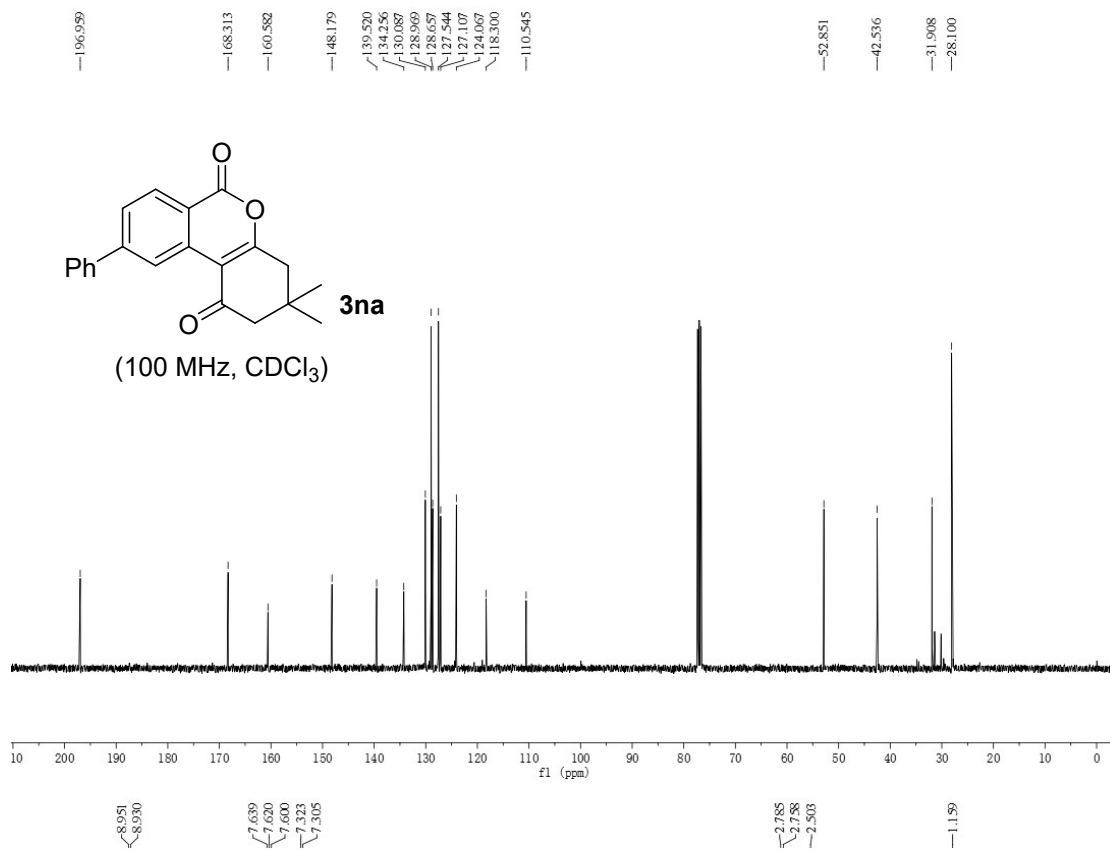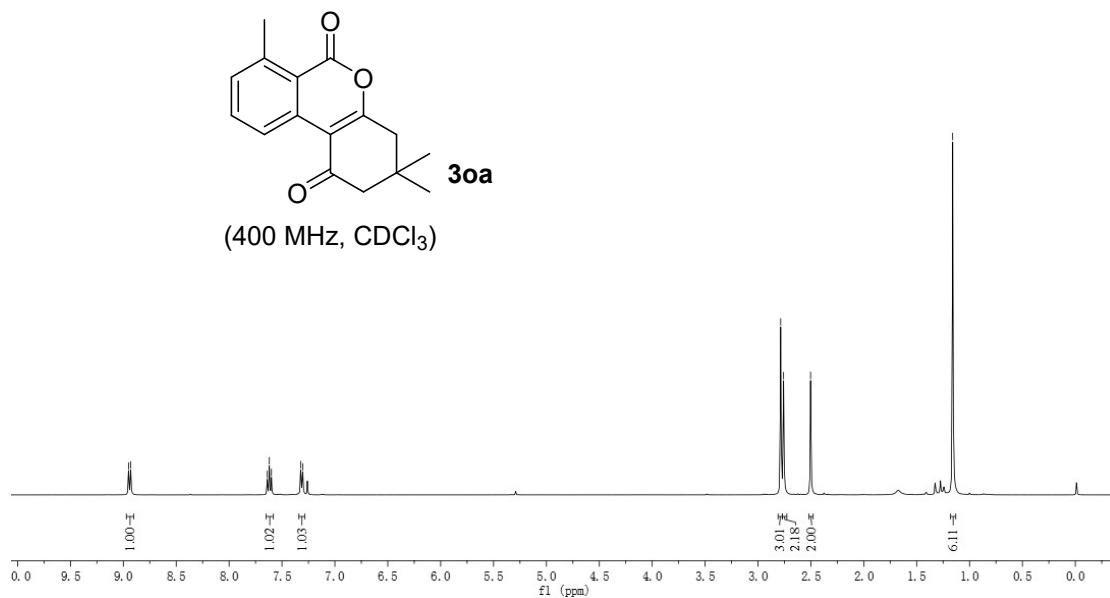



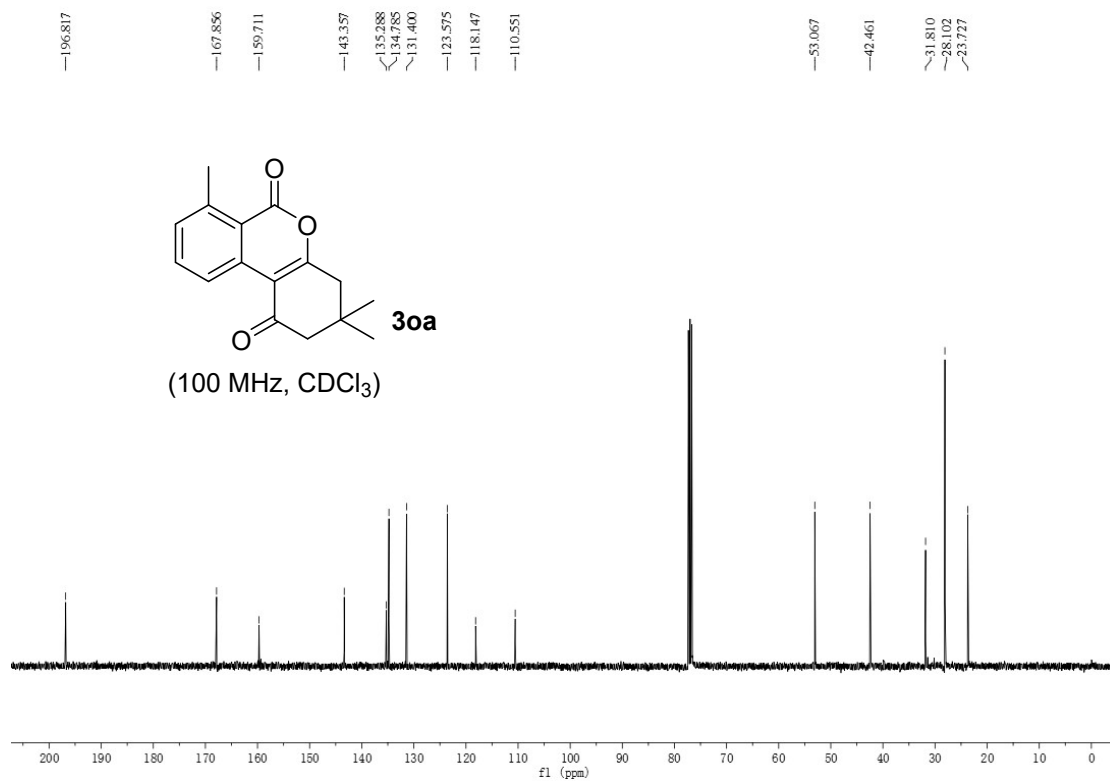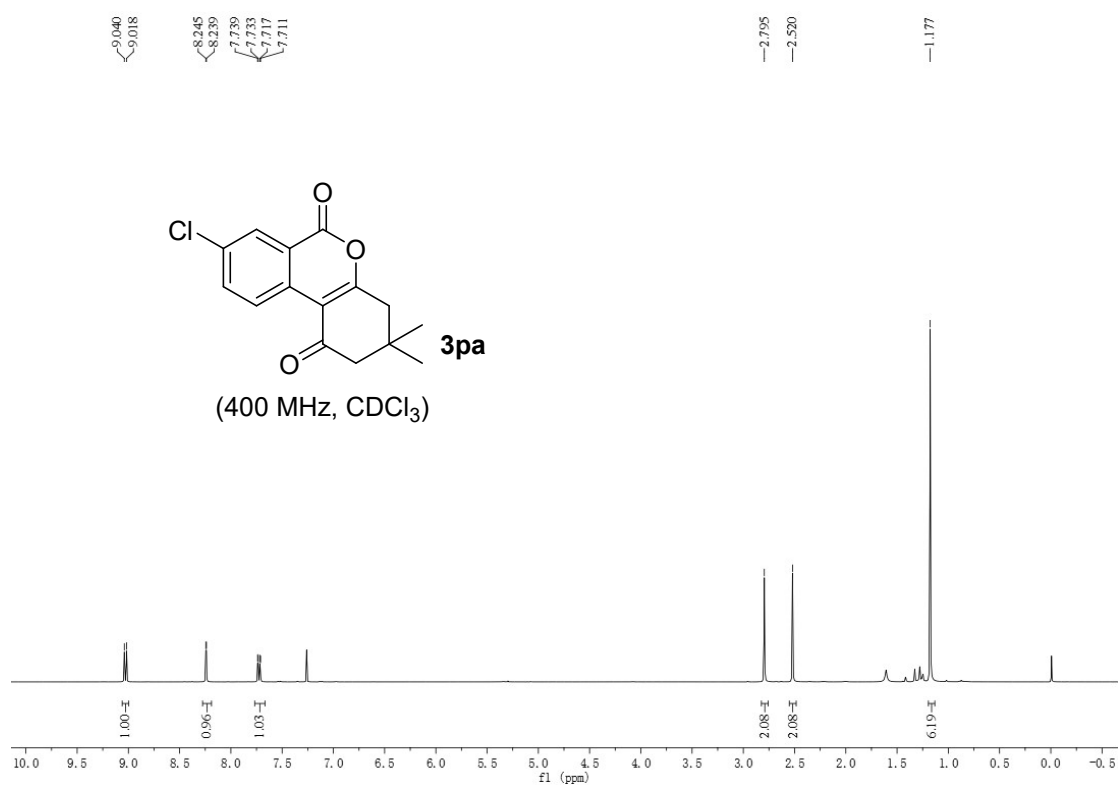

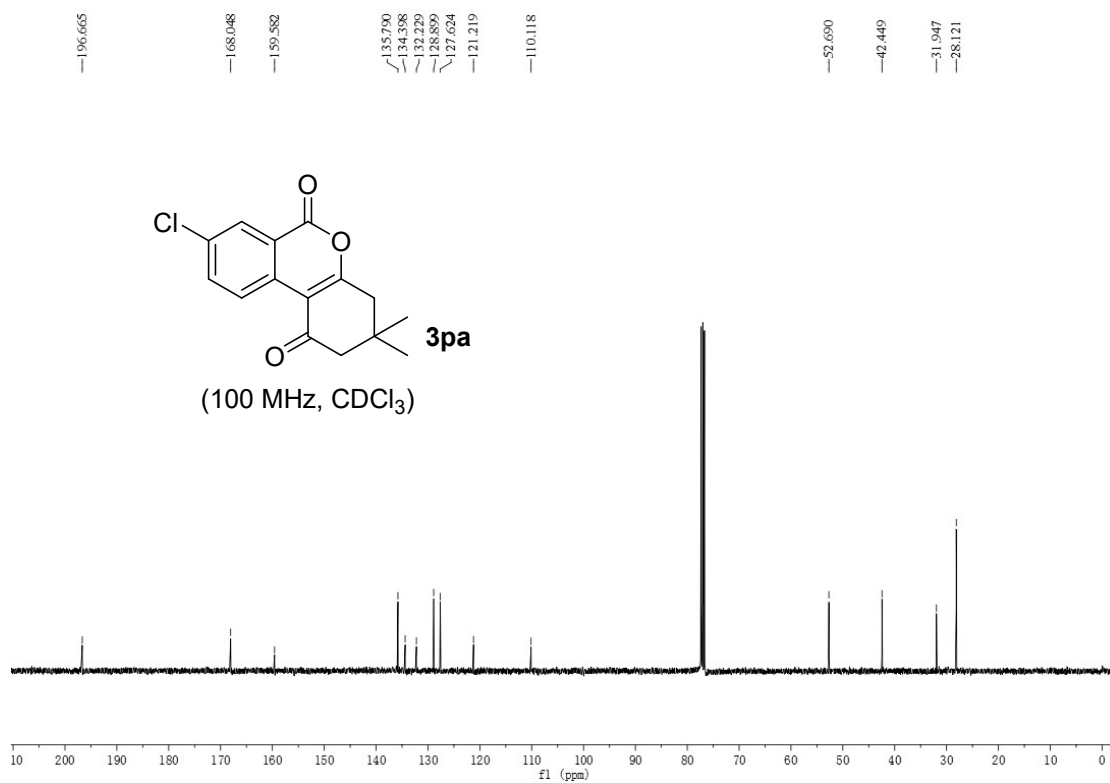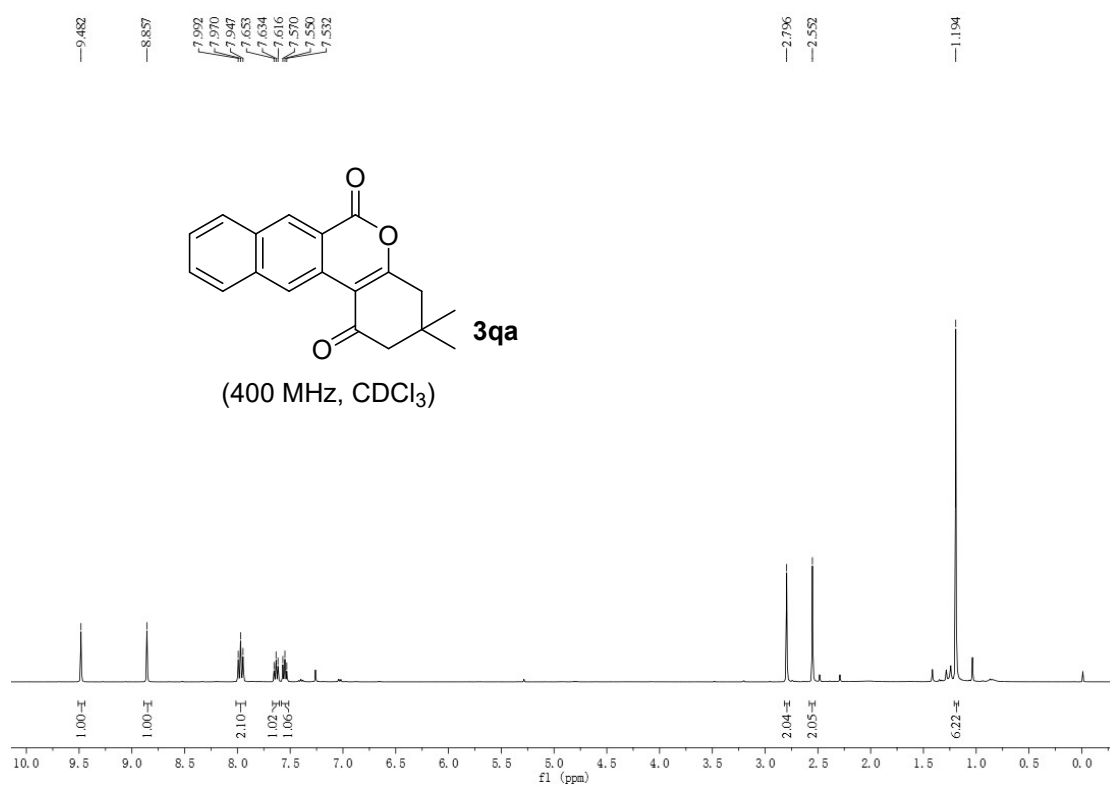

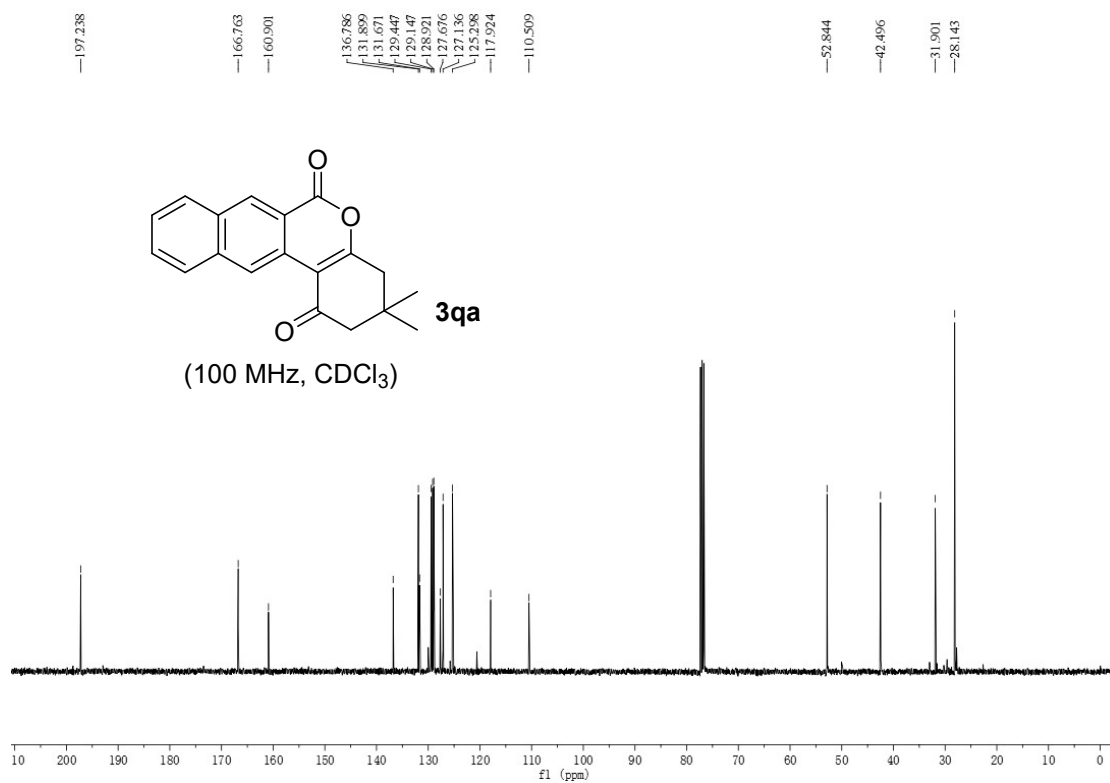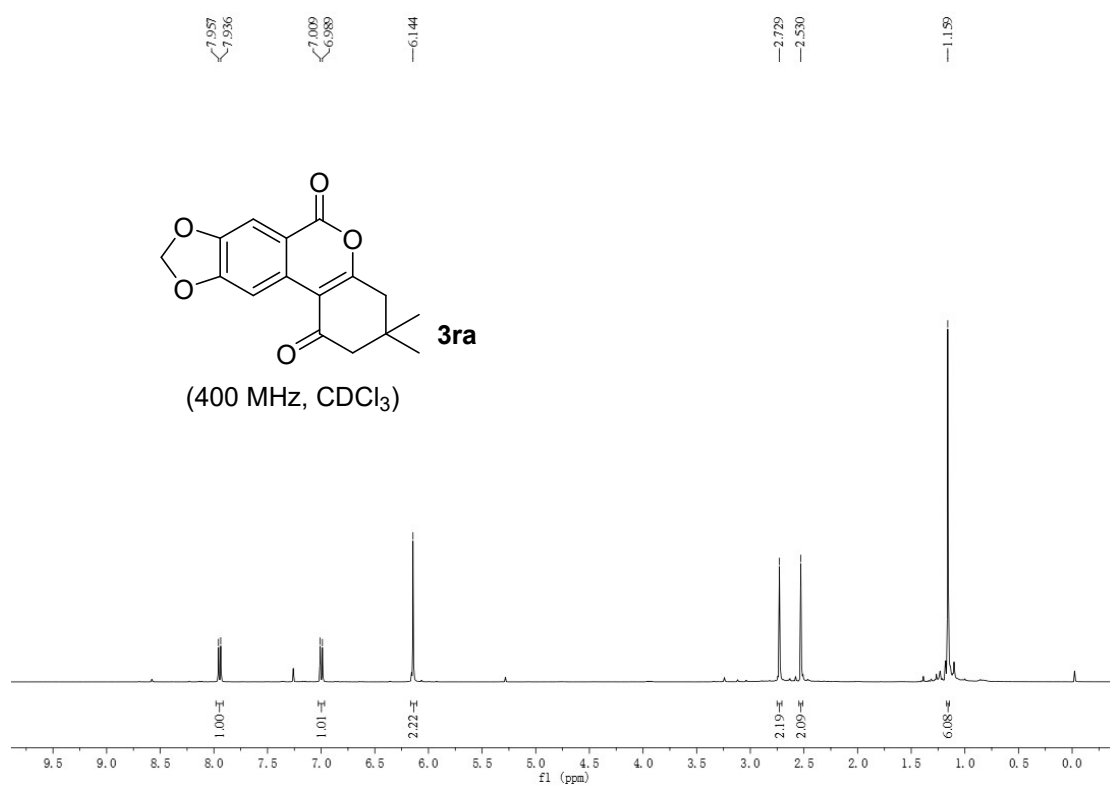

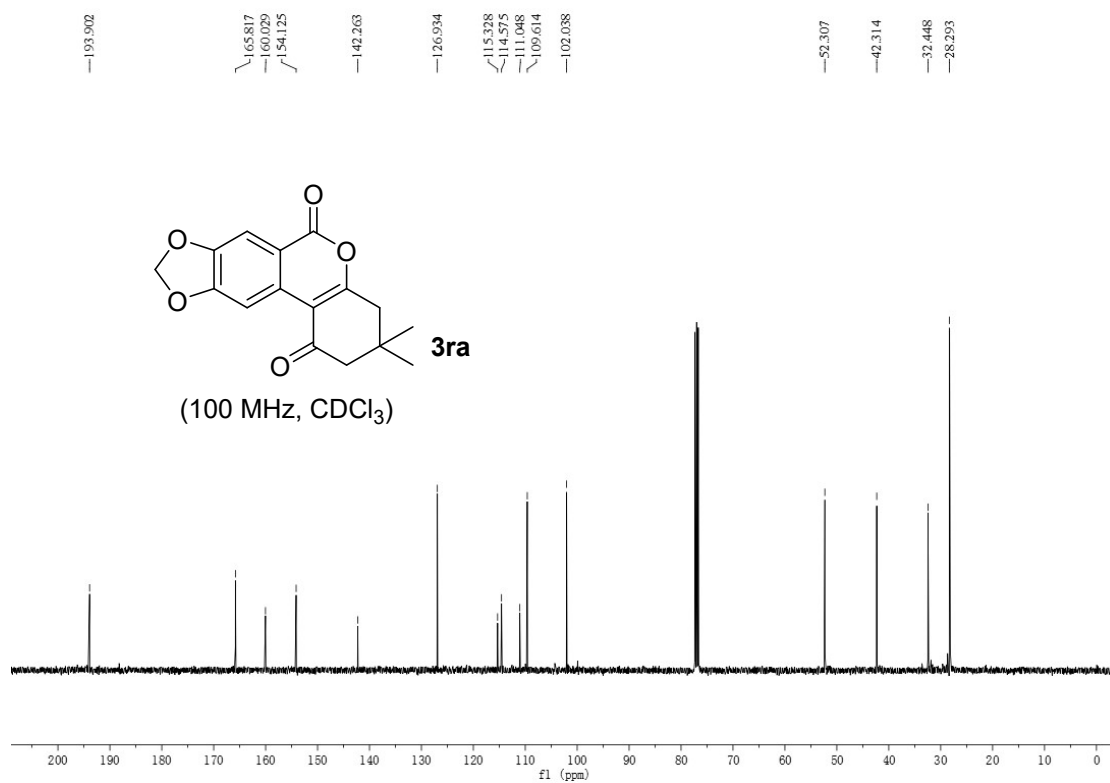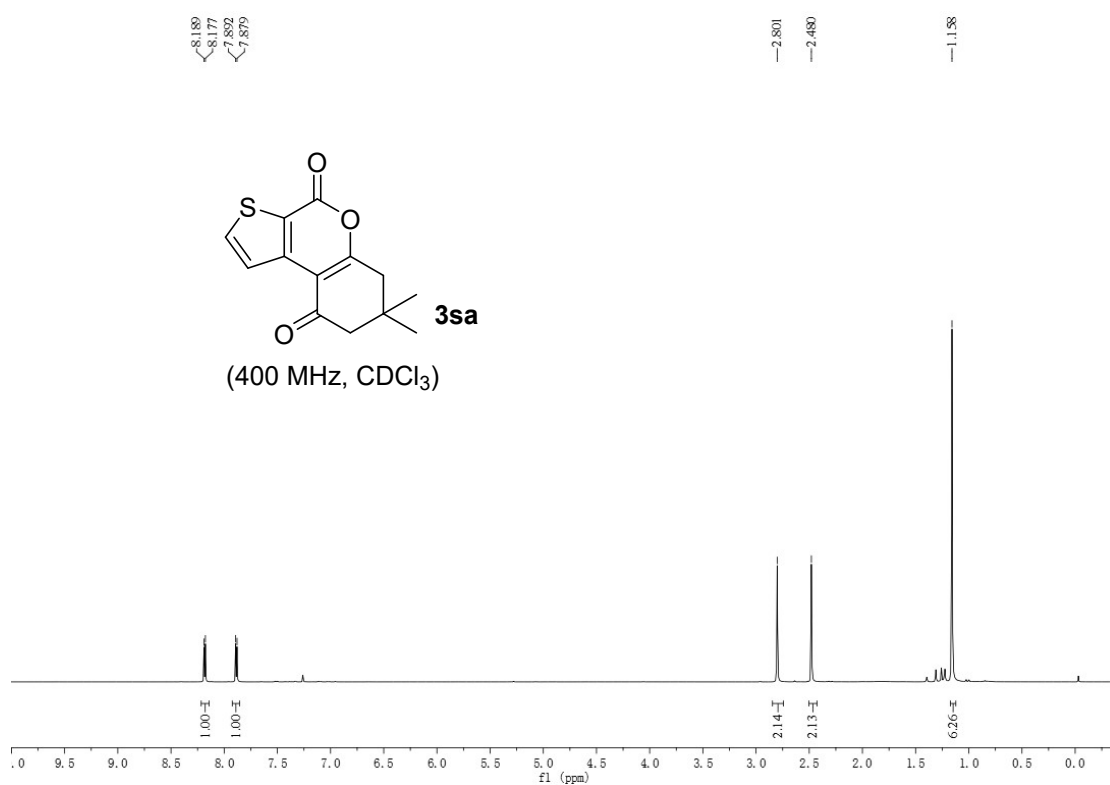

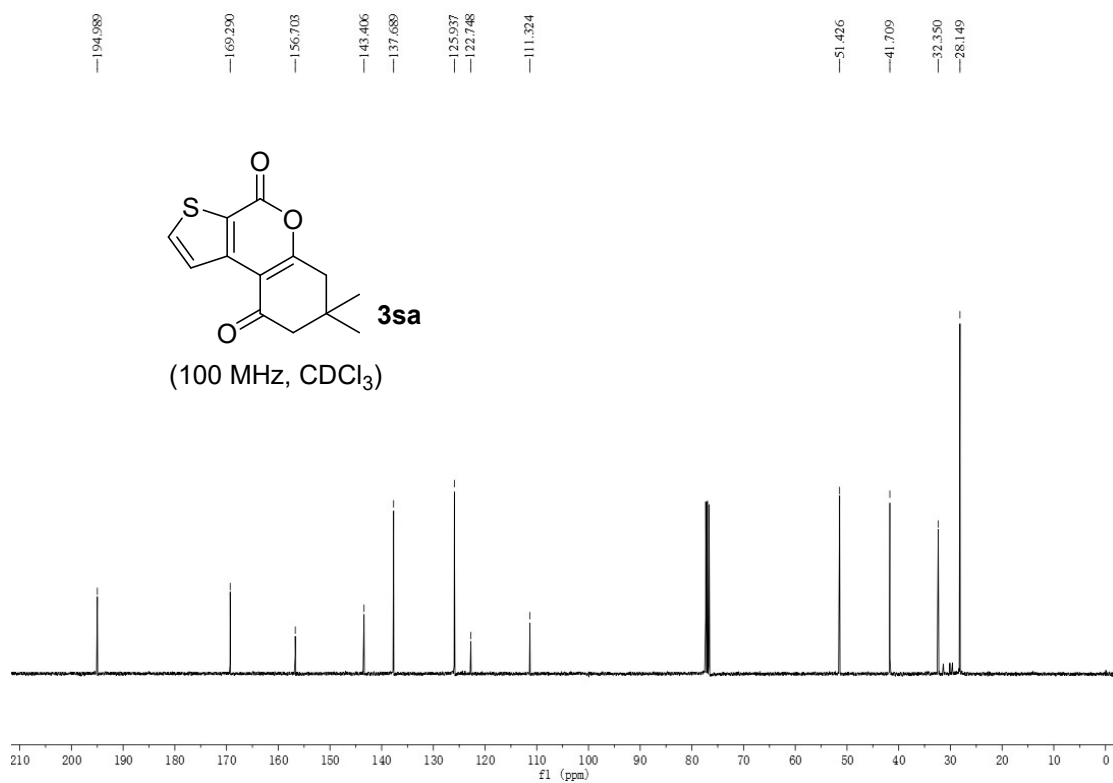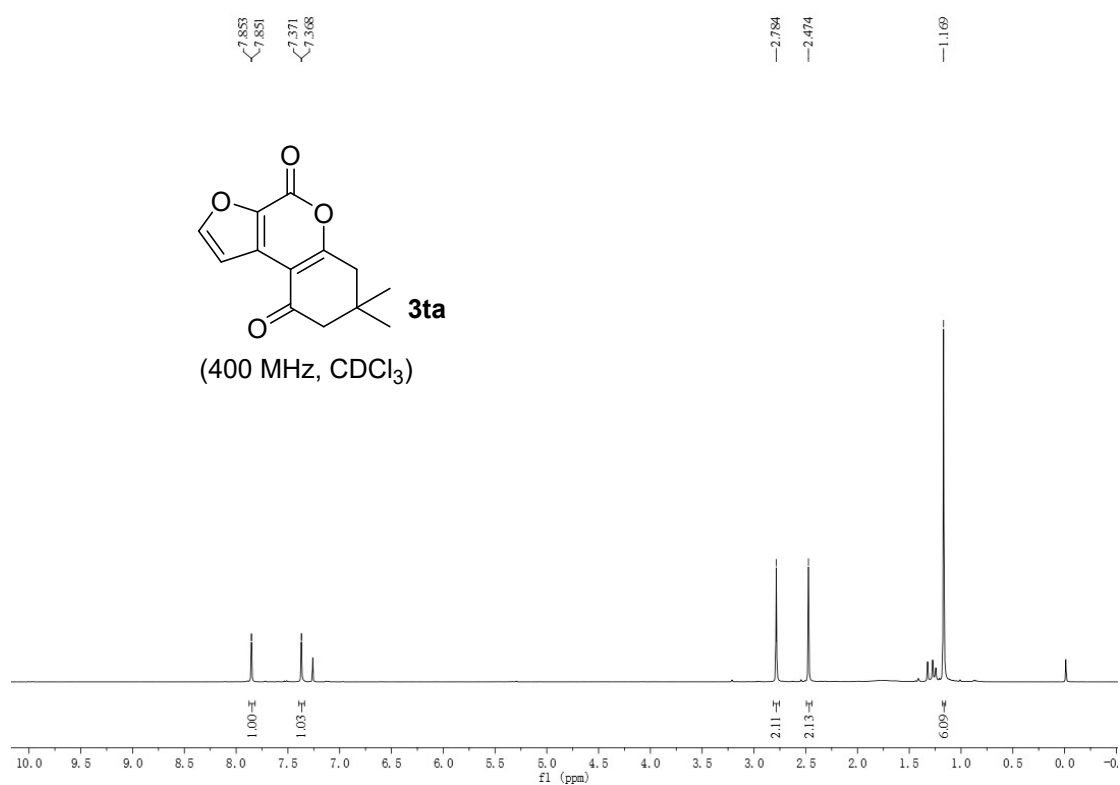

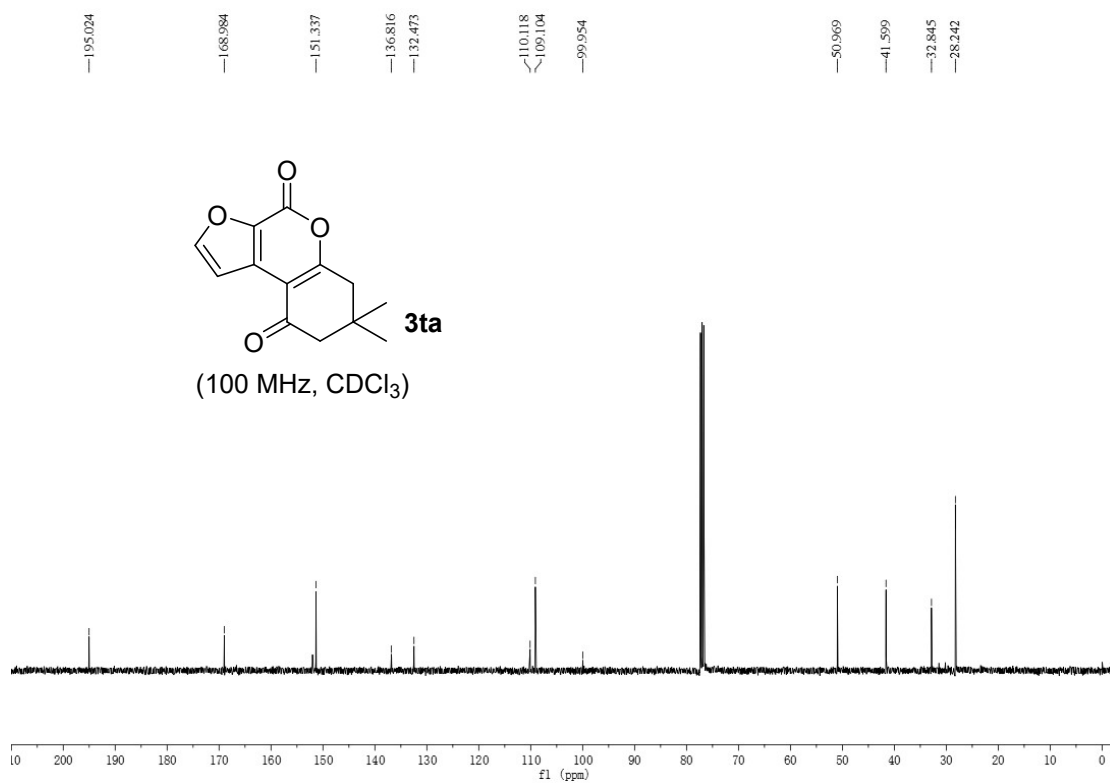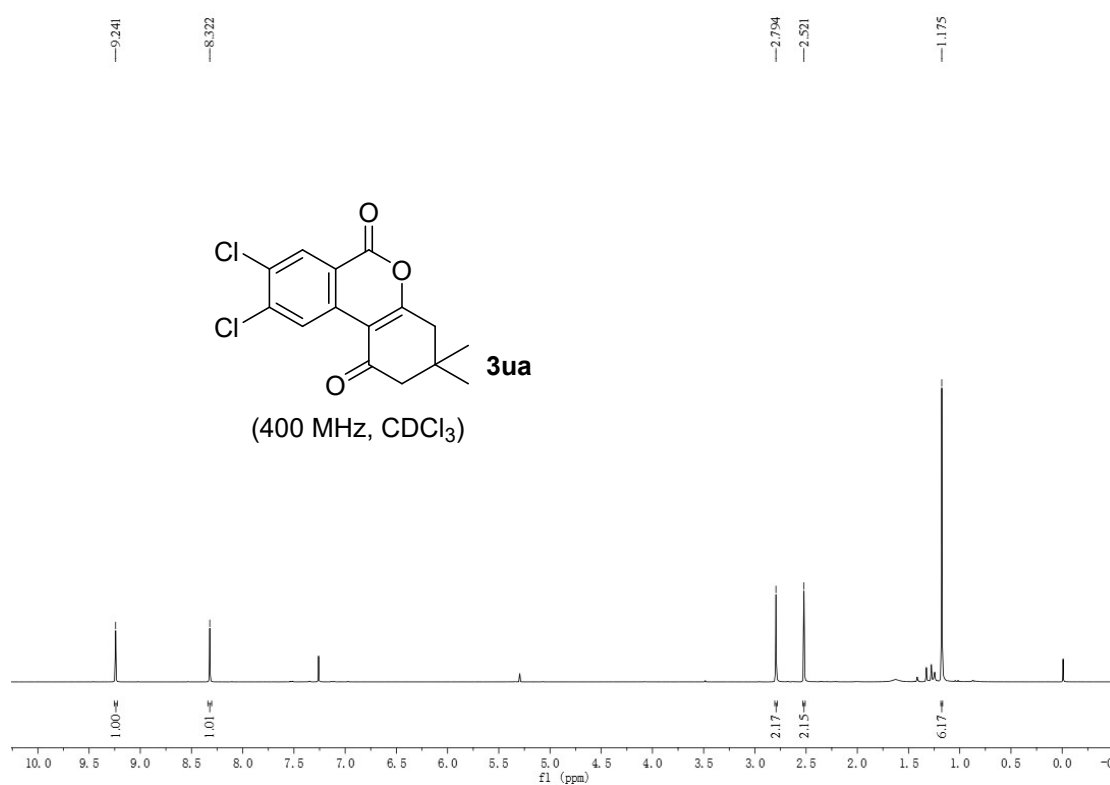

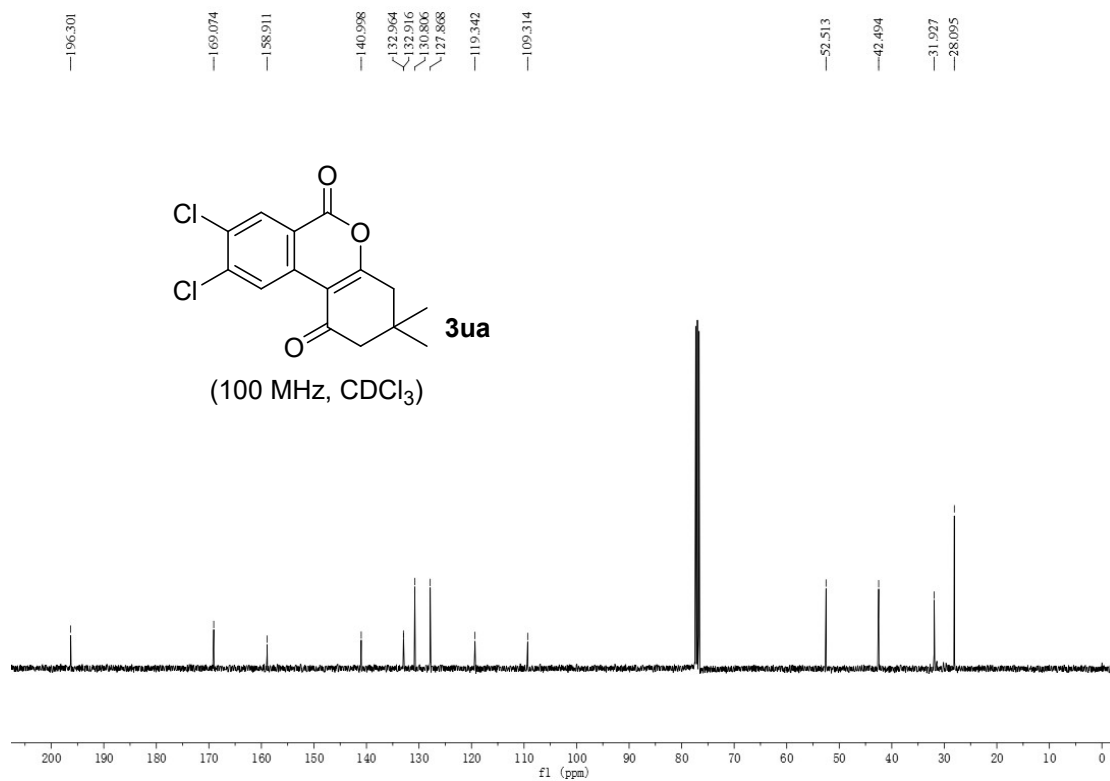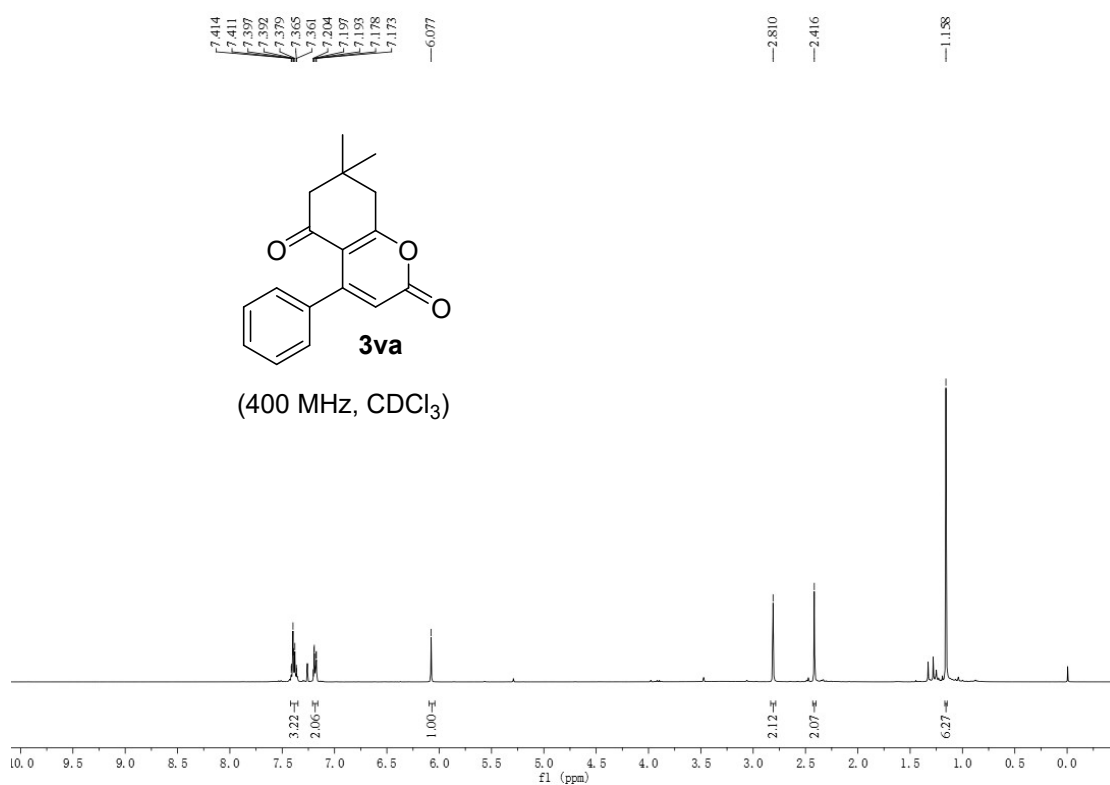

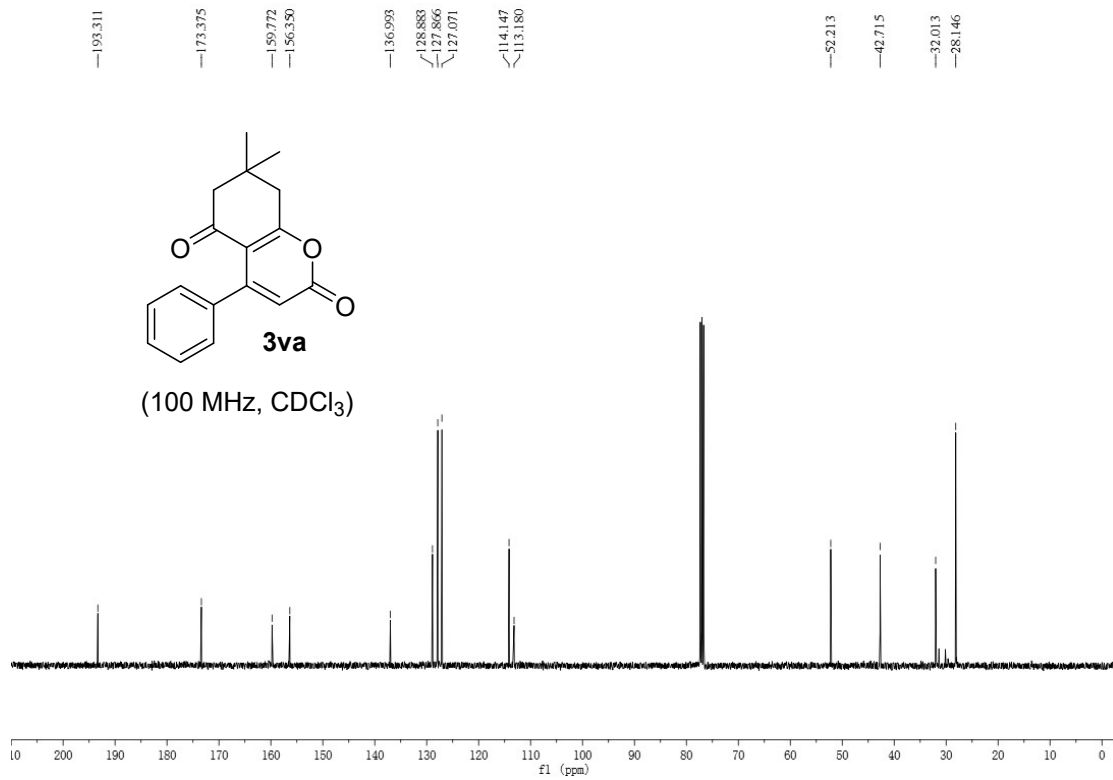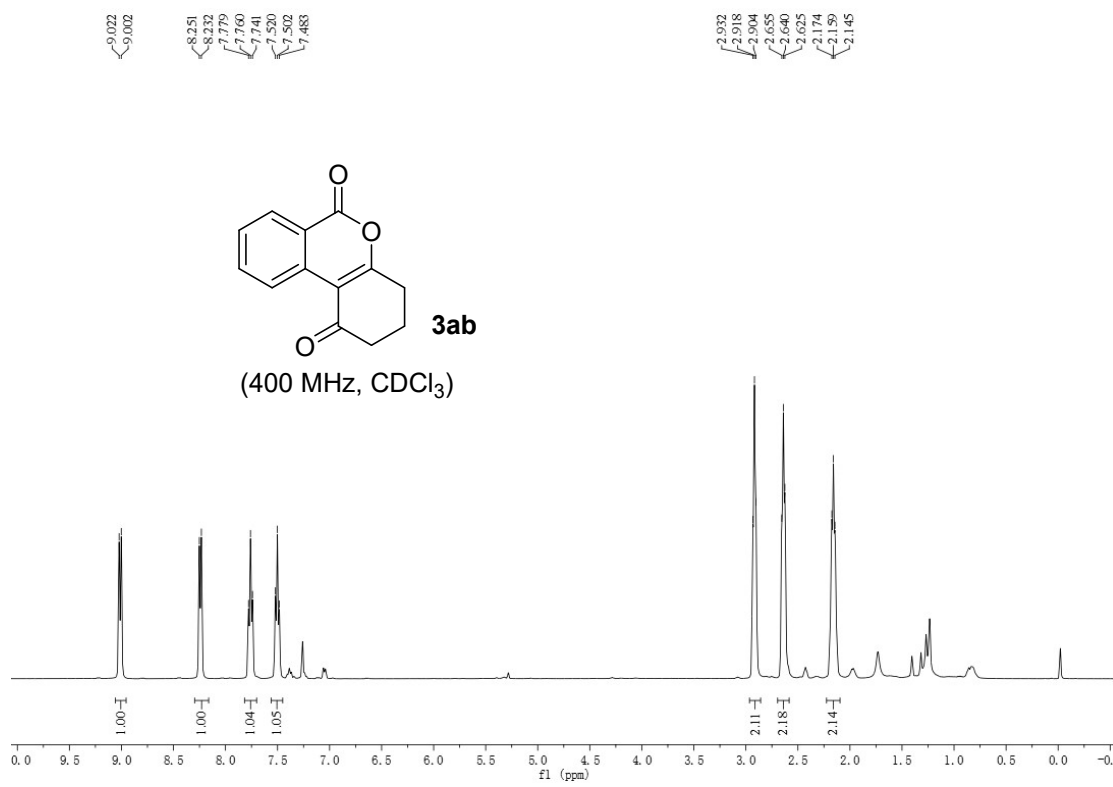



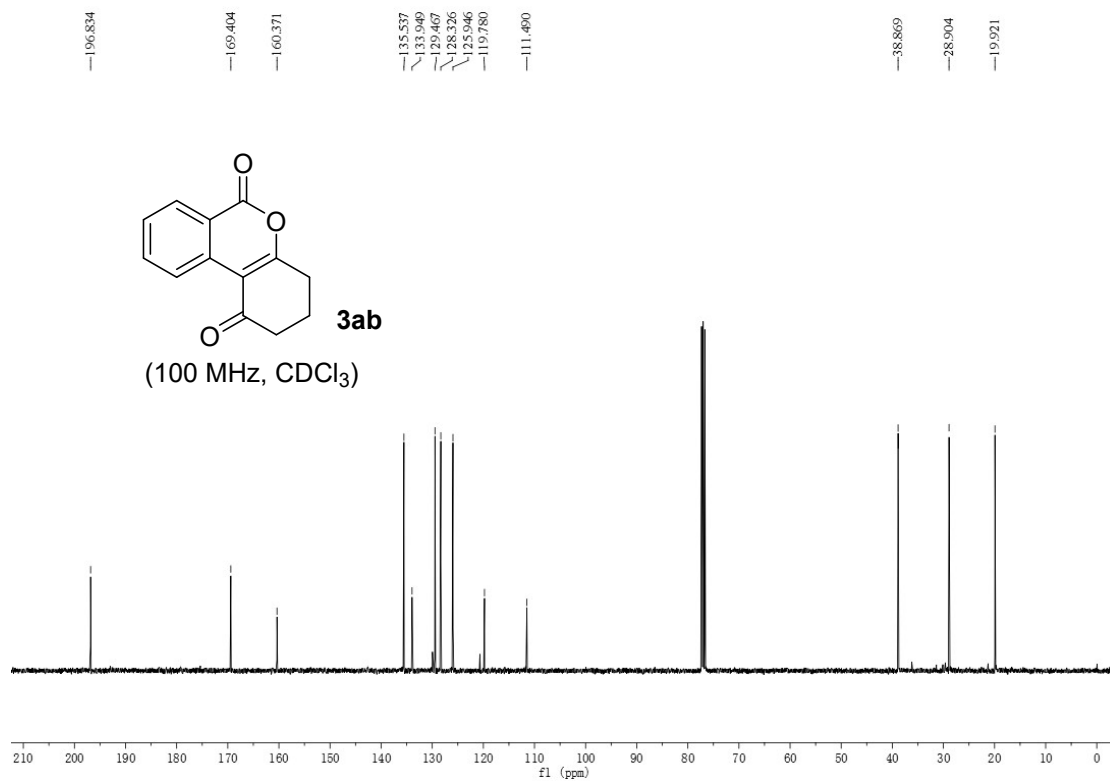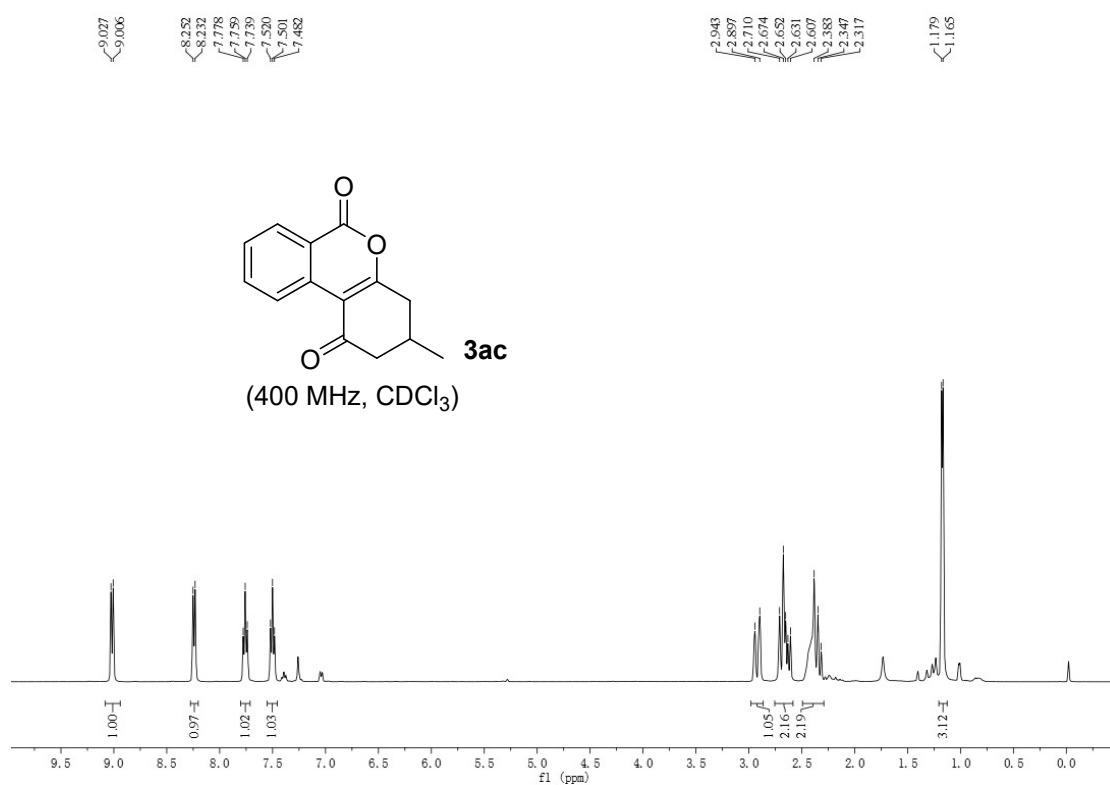

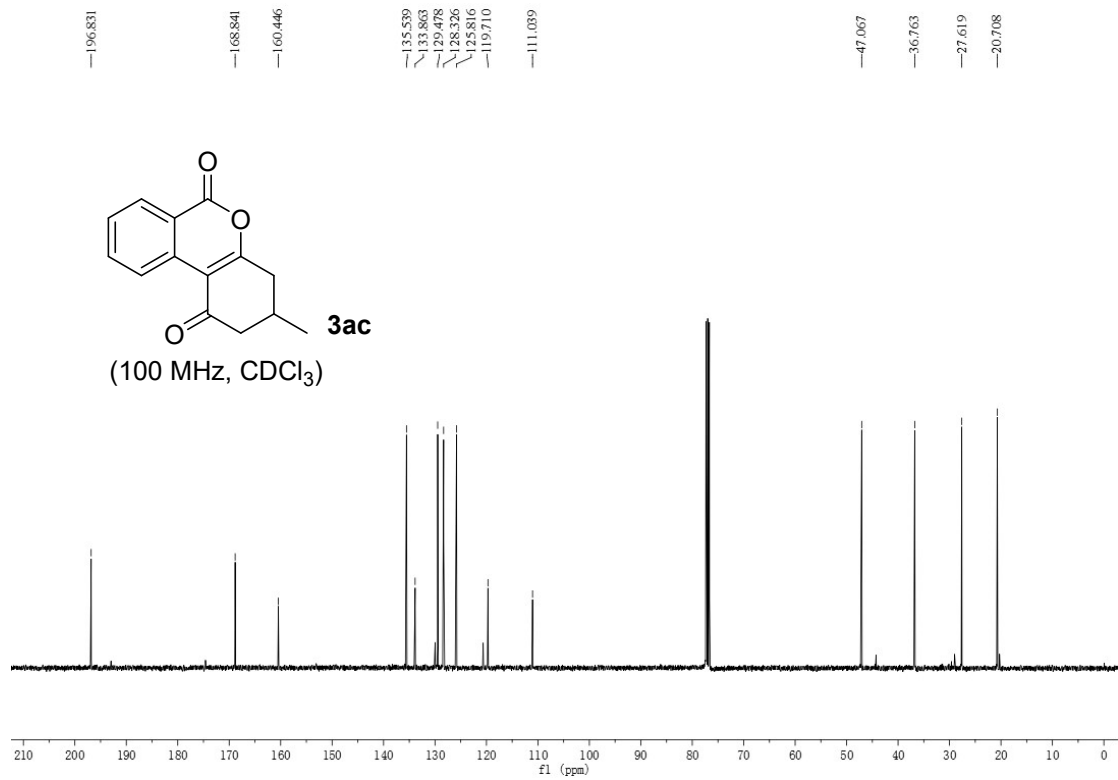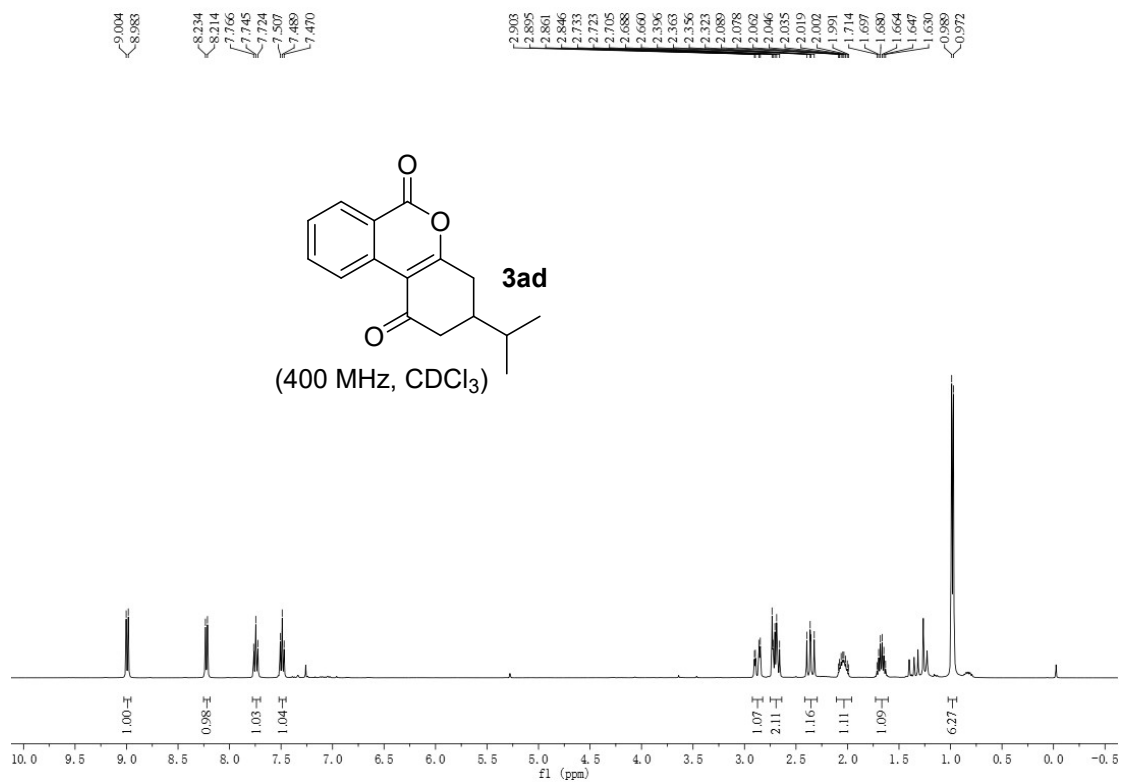

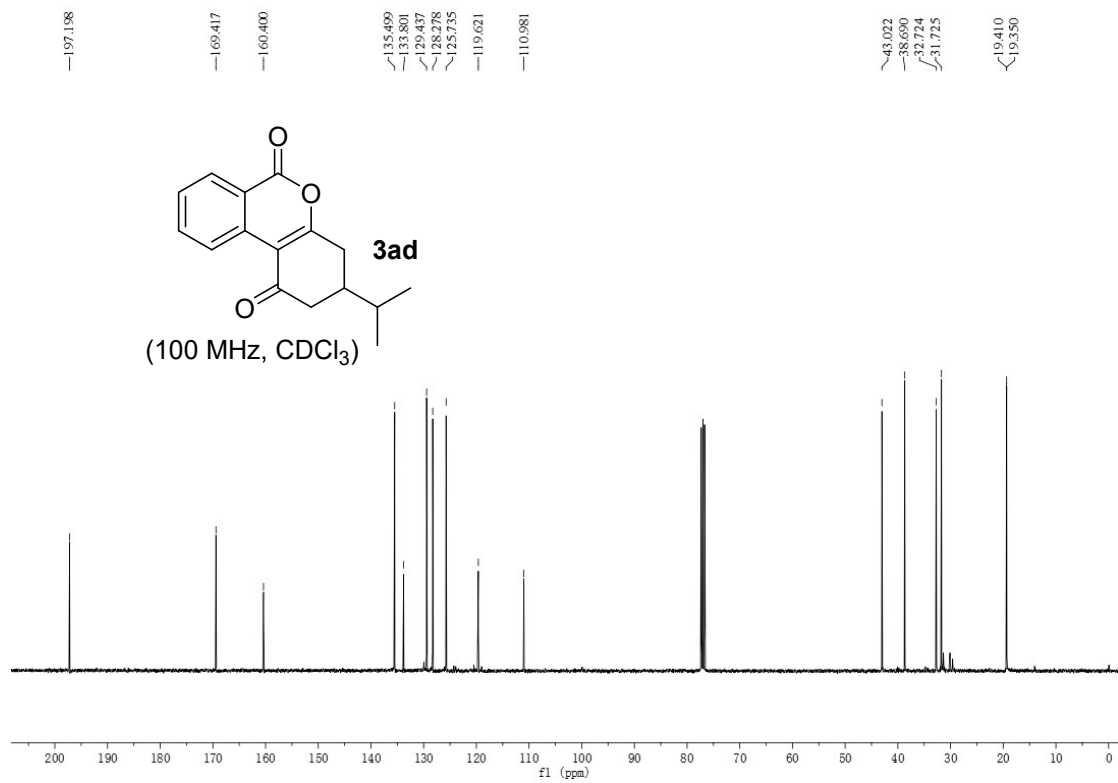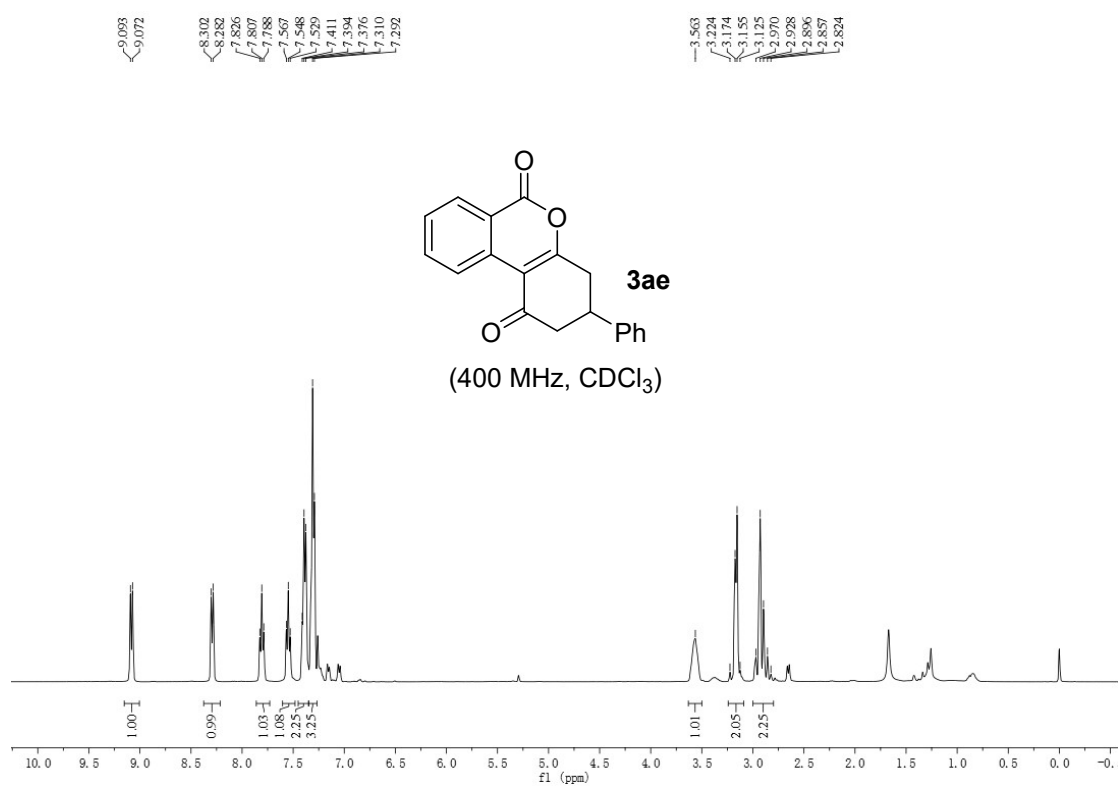

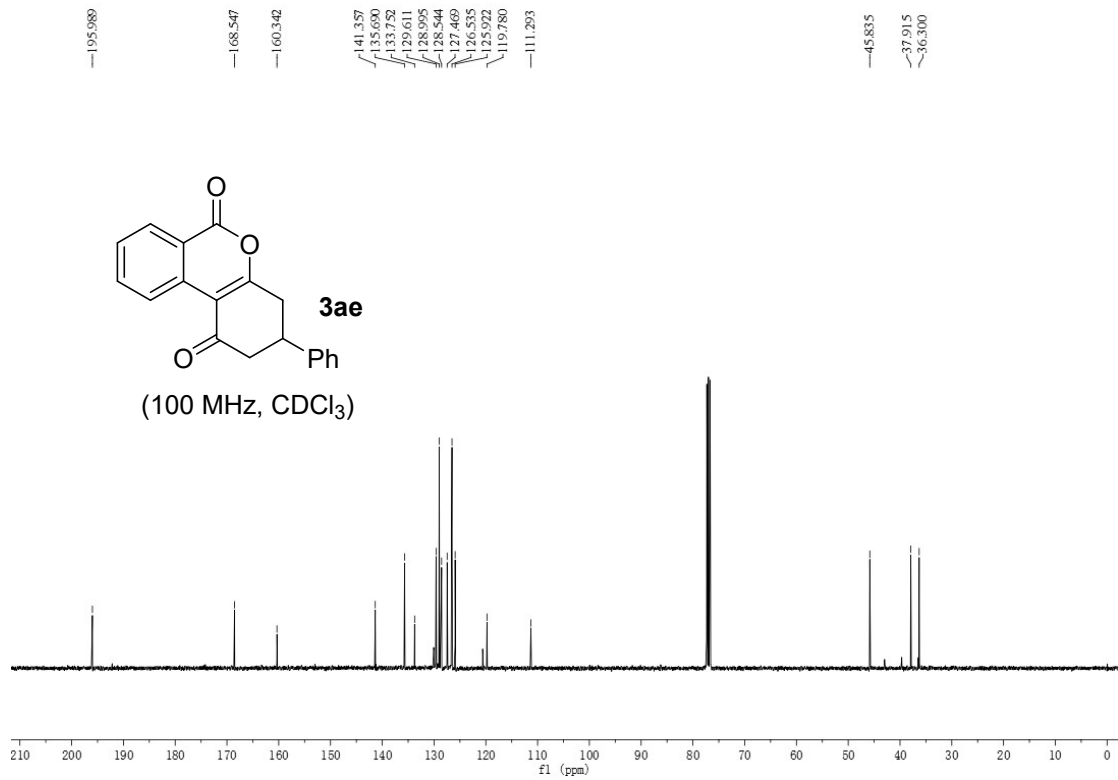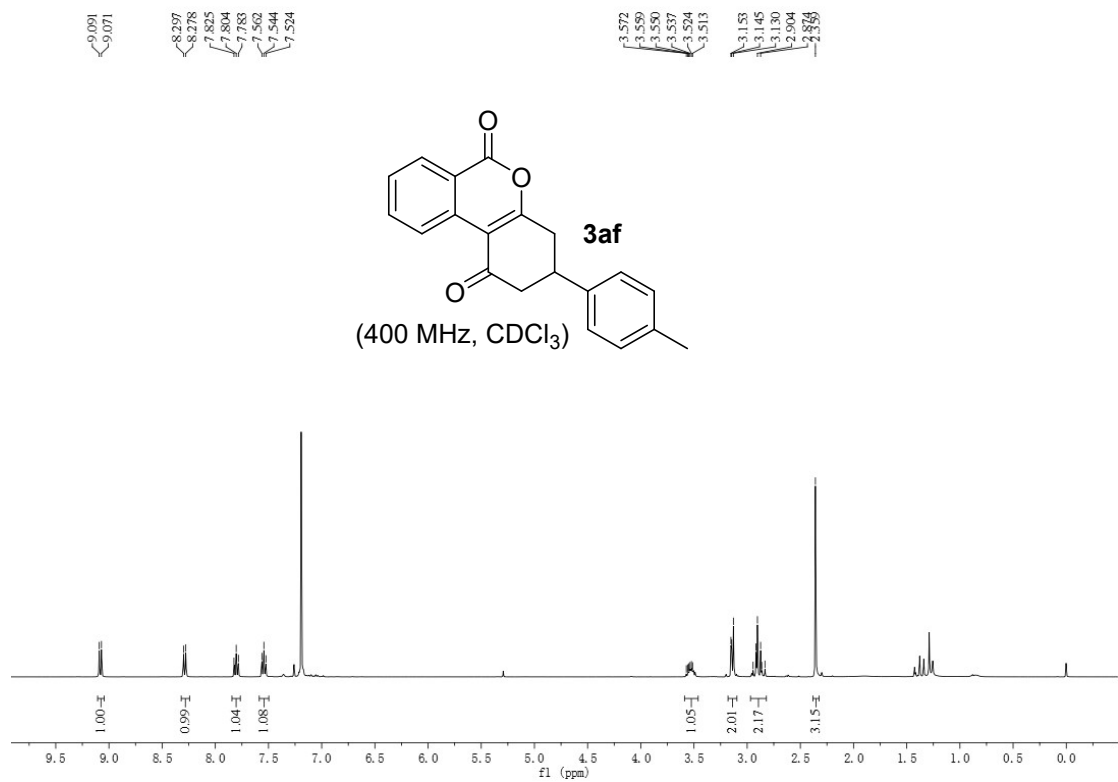

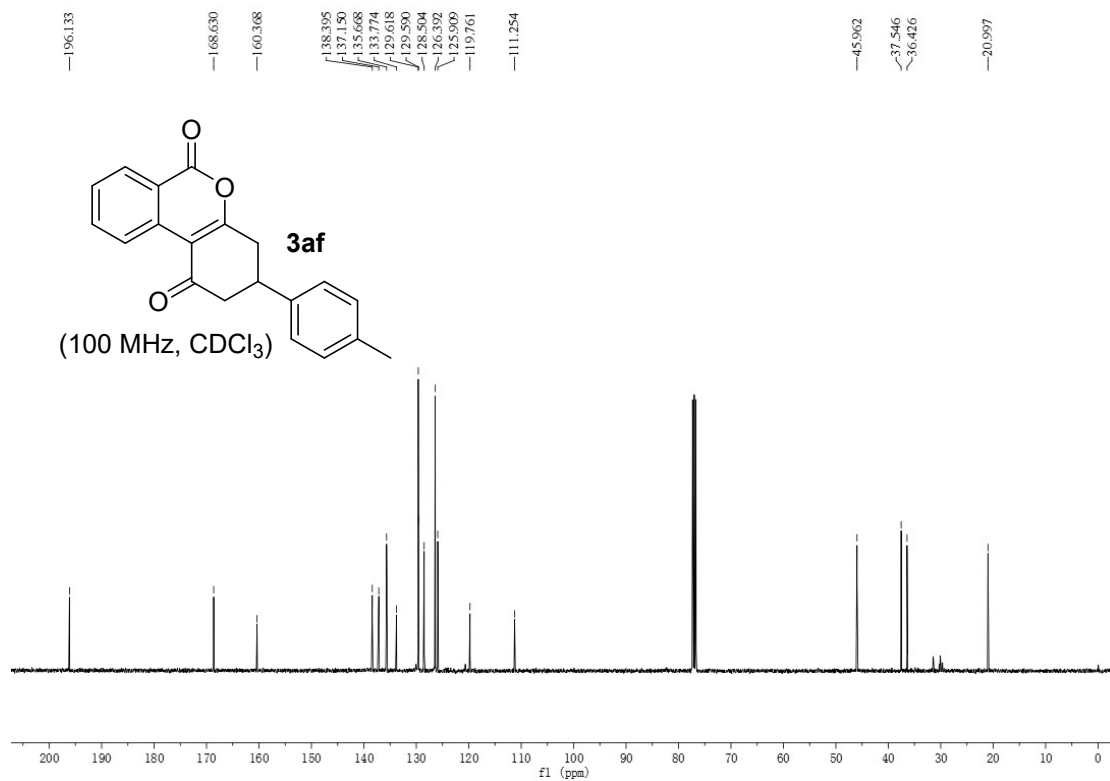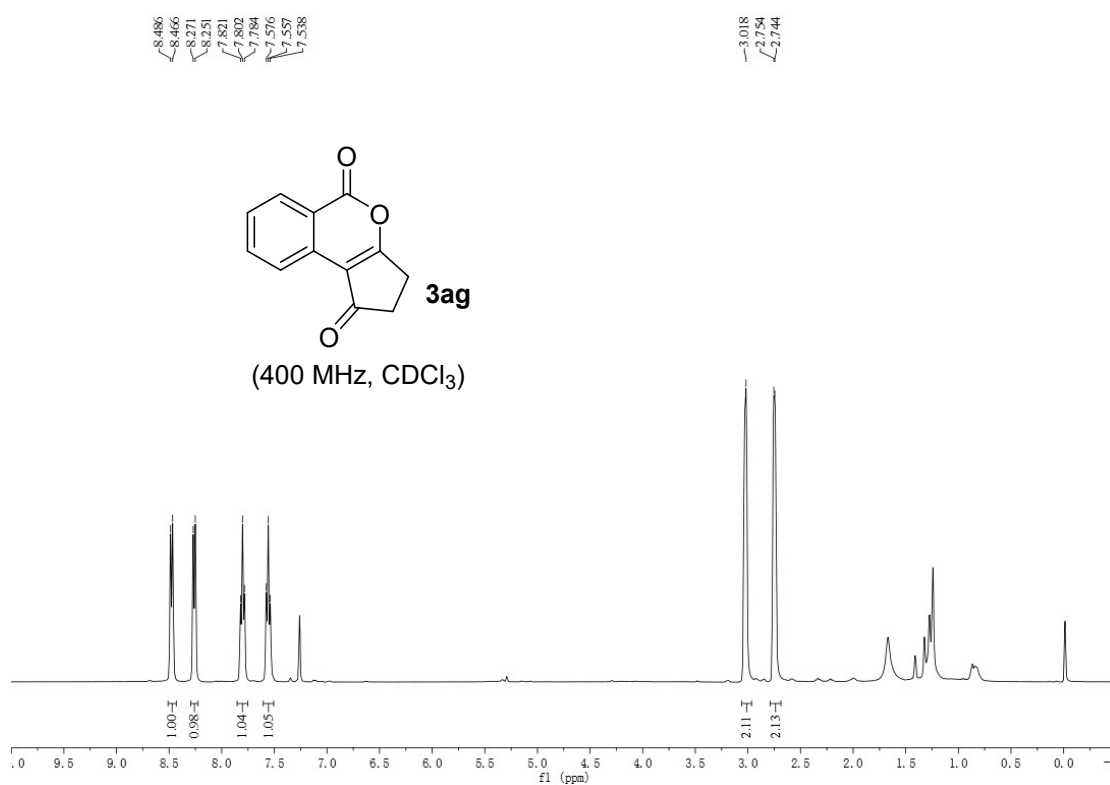

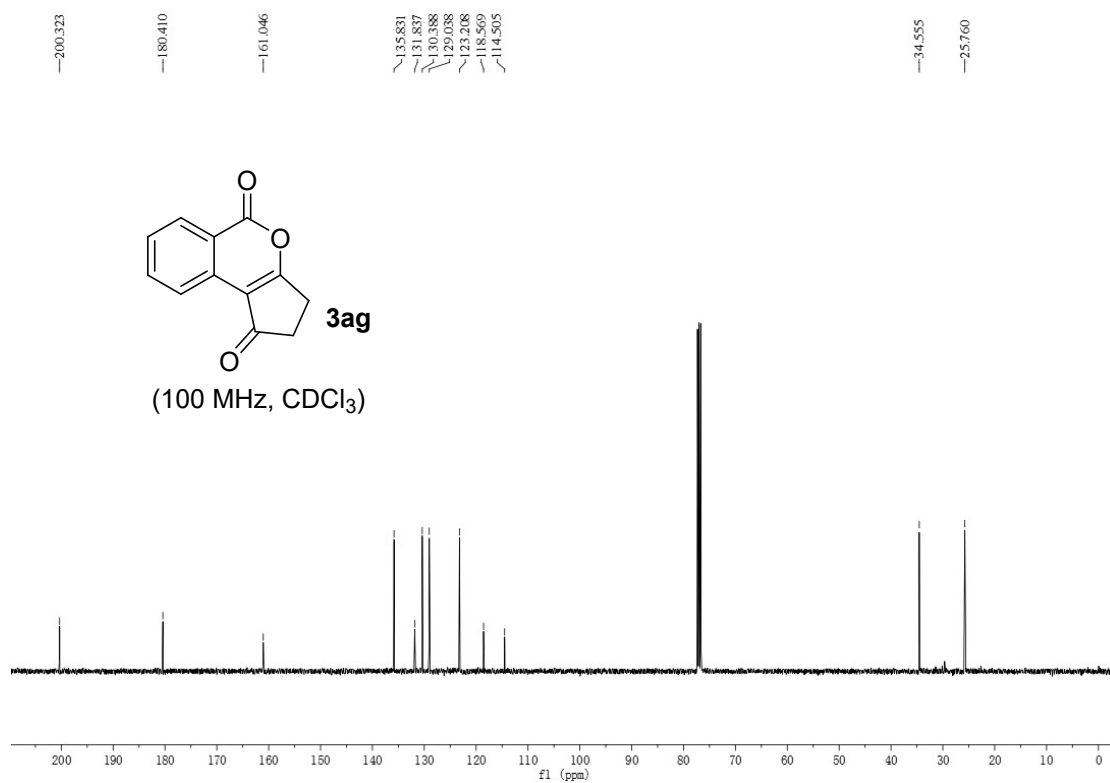

Supplement: d2cc05899e1.pdf [file d2cc05899e1.pdf]
